# Supplementary material for: Facile synthesis of functionalized quinolinones in a green reaction medium and their photophysical properties
Source: Royal Society of Chemistry journal article supplement (doi:10.1039/d4ob01390e), 2024-10-30
Supplement: d4ob01390e1.pdf [file d4ob01390e1.pdf]

**Electronic Supporting Information (ESI)**  
for  
**Facile Synthesis of Functionalized Quinolinones in  
Greener Reaction Medium and Their Photophysical  
Properties**

Pari Keerthana, Sundararajan Suresh, Fazhlur-Rahman Nawaz Khan\*

\* *Organic and Medicinal Chemistry Research Laboratory, School of Advanced Sciences, Vellore  
Institute of Technology, Vellore-632 014, Tamil Nadu, India. E-mail: [nawaz\\_f@yahoo.co.in](mailto:nawaz_f@yahoo.co.in);*

**Table of Contents**

|                                                                                                                                                                                                                                                                                                                                                               |         |
|---------------------------------------------------------------------------------------------------------------------------------------------------------------------------------------------------------------------------------------------------------------------------------------------------------------------------------------------------------------|---------|
| 1. General Information                                                                                                                                                                                                                                                                                                                                        | S2      |
| 2. Experimental Procedure<br>2.1 General procedure for the synthesis of K <sub>2</sub> CO <sub>3</sub> :Ethylene glycol (DES-1)<br>and DMU:Tartaric acid (7:3) (DES-2)<br>2.2 General procedure for the synthesis of compounds <b>5a-5l</b><br>2.3 General procedure for the synthesis of compounds <b>6a-6p</b><br>2.4 The gram-scale synthesis of <b>6a</b> | S2-S4   |
| 3. Spectral Data for the Synthesized Compounds                                                                                                                                                                                                                                                                                                                | S4-S18  |
| 4. Mechanistic Investigations<br>4.1 Control experiment study<br>4.2 Mass spectroscopic studies for the intermediate detection<br>4.3 Reaction monitoring by <sup>1</sup> H NMR analysis                                                                                                                                                                      | S18-S28 |
| 5. X-Ray Crystallography Data                                                                                                                                                                                                                                                                                                                                 | S28-S29 |
| 6. Copies of NMR ( <sup>1</sup> H & <sup>13</sup> C), FT-IR and HRMS Spectra                                                                                                                                                                                                                                                                                  | S30-S88 |
| 7. References                                                                                                                                                                                                                                                                                                                                                 | S89     |

## 1. General Information

All the reagents and chemicals were purchased from common commercial suppliers like Sigma-Aldrich, Merck, and SRL and directly used as received without any further purification unless otherwise mentioned. All the reactions were carried out under oven-dried glass containers in parallel synthesizer unless otherwise mentioned. Completion of reactions was examined by thin layer chromatography carried out on pre-coated Merck silica gel-60 F254 aluminium plates with ultraviolet light (UV) or iodine as visualizing agents. Merck silica gel 60 - 120 was used for column chromatography.  $^1\text{H}$  and  $^{13}\text{C}$  NMR spectra were recorded at Bruker Advance III ( $^1\text{H}$  at 400 MHz and  $^{13}\text{C}$  at 101 MHz) using  $\text{CDCl}_3$  as a solvent. The Chemical shifts,  $\delta$  (in ppm), are reported relative to TMS  $\delta$  ( $^1\text{H}$ ) 0.0 ppm,  $\delta$  ( $^{13}\text{C}$ ) 0.0 ppm, which was used as the internal reference. Otherwise, the solvents residual proton resonance and carbon resonance ( $\text{CHCl}_3$ ,  $\delta$  ( $^1\text{H}$ ) 7.26 ppm,  $\delta$  ( $^{13}\text{C}$ ) 77.16 ppm, were also used for calibration. Chemical shifts ( $\delta$ ) values were reported in ppm and spin-spin coupling constant (J) was expressed in Hz, and the following abbreviations are used to describe multiplicity: s = singlet, d = doublet, dd = doublet of doublet, dt = doublet of triplet, t = triplet, m = multiplet, q = quartet, pent = pentate, sext = sextet. Melting points were determined using the Electrothermal IA 9200 apparatus. IR spectra were recorded on Thermo Nicolet iS50 with an inbuilt ATR (Shimadzu IR Tracer-100) spectrometer. Mass spectra were recorded on WATERS-XEVO G2-XS-QToF (A positive electrospray ionization (ESI<sup>+</sup>) mode). Single-crystal X-ray diffraction was recorded using a D8-QUEST single-crystal XRD diffractometer; all data calculations were executed using the APEX2 program package on the PC version. The UV-vis and emission spectra were recorded with a Hitachi U-2900 apparatus JASCO V-670 PC spectrophotometer.

## 2. Experimental Procedure

### 2.1 General procedure for the synthesis of $\text{K}_2\text{CO}_3$ :Ethylene glycol (DES-1) and DMU:Tartaric acid (7:3) (DES-2)

A mixture of  $\text{K}_2\text{CO}_3$  and ethylene glycol was added to an oven-dried reaction vial and heated at 100 °C for 5 mins to form the  $\text{K}_2\text{CO}_3$ :Ethylene glycol deep Eutectic Solvent (DES-1). Similarly, the synthesis of the DMU:Tartaric acid (7:3) DES (DES-2) was carried out as per the procedure in prior literature.<sup>1</sup>

## 2.2 General procedure for the synthesis of compounds 5a-5l

A mixture of substituted 2-amino benzhydrol **1**<sup>2</sup> (0.5 mmol, 1.0 equiv.), Ni(OAc)<sub>2</sub>·4H<sub>2</sub>O (10 mol%), 2,2'-bipyridyl (15 mol%), KO<sup>t</sup>Bu (1.0 equiv.) and K<sub>2</sub>CO<sub>3</sub>:Ethylene glycol (1:5) (500 mg) were added and the reaction was conducted at 100 °C for 4 h to form the benzophenone **1a**. Then, ethyl acetoacetate **2** (0.5 mmol, 1.0 equiv.) was added, and the reaction mixture was heated at 100 °C for 3 h to form the intermediate **A**. Subsequently, K<sub>2</sub>CO<sub>3</sub>:Ethylene glycol (1:5) (500 mg) and phenacyl bromide **3** (0.5 mmol, 1.0 equiv.) were added and continued at 100 °C for an additional 3 h to form the N-alkylated intermediate **B**. After that, DMU:Tartaric acid (7:3) (300 mg) and alcohol **4** (0.6 mmol, 1.2 equiv.) were sequentially added, and the reaction was continued at 100 °C for 4 h. The entire reaction process was monitored by TLC. Upon completion of the reaction, the reaction mixture was cooled to RT, quenched with water (50 ml), and extracted with ethyl acetate (40 ml x 2). The combined organic layer was dried over anhydrous Na<sub>2</sub>SO<sub>4</sub>, and the crude reaction mixture was purified by silica gel column chromatography using 10-25% EtOAc/Pet ether as eluent, yielding a 68-81% of the desired products (**5a-5l**).

## 2.3 General procedure for the synthesis of compounds 6a-6p

A mixture of substituted 2-amino benzhydrol **1**<sup>2</sup> (0.5 mmol, 1.0 equiv.), Ni(OAc)<sub>2</sub>·4H<sub>2</sub>O (10 mol%), 2,2'-bipyridyl (15 mol%), KO<sup>t</sup>Bu (1.0 equiv.) and K<sub>2</sub>CO<sub>3</sub>:Ethylene glycol (1:5) (500 mg) were added and the reaction was conducted at 100 °C for 4 h to form the benzophenone **1a**. Then, ethyl acetoacetate **2** (0.5 mmol, 1.0 equiv.) was added, and the reaction mixture was heated at 100 °C for 3 h to produce intermediate **A**. Subsequently, K<sub>2</sub>CO<sub>3</sub>:Ethylene glycol (1:5) (500 mg) and phenacyl bromide **3** (0.5 mmol, 1.0 equiv.) were added and continued at 100 °C for an additional 3 h to form the N-alkylated intermediate **B**. After that, DMU:Tartaric acid (7:3) (300 mg) and alcohol **4** (1.5 mmol, 3.0 equiv.) were sequentially added, and the reaction was continued at 100 °C for 7 h. The entire reaction process was monitored by TLC. Upon completion of the reaction, the reaction mixture was cooled to RT, quenched with water (50 ml), and extracted with ethyl acetate (40 ml x 2). The combined organic layer was dried over anhydrous Na<sub>2</sub>SO<sub>4</sub>, and the crude reaction mixture was purified by silica gel column chromatography using 10-20% EtOAc/Pet ether as eluent, yielding 69-84% of the desired products (**6a-6p**).

## 2.4 The gram-scale synthesis of 6a

A mixture of substituted 2-amino-5-chloro benzhydrol **1a** (2.33 g, 10.0 mmol, 1.0 equiv.), Ni(OAc)<sub>2</sub>·4H<sub>2</sub>O (249 mg, 10 mol%), 2,2'-bipyridyl (234 mg, 15 mol%), KO<sup>t</sup>Bu (1.12 g, 10.0 mmol, 1.0 equiv.), and K<sub>2</sub>CO<sub>3</sub>:Ethylene glycol (1:5) (10.0 g) were added and the reaction was conducted at 100 °C for 4 h to form the benzophenone **1a**. Then, ethyl acetoacetate **2a** (1.30 g, 10.0 mmol, 1.0 equiv.) was added, and the reaction mixture was heated at 100 °C for 3 h to produce intermediate **A**. Subsequently, K<sub>2</sub>CO<sub>3</sub>:Ethylene glycol (1:5) (10.0 g) and phenacyl bromide **3a** (1.99 g, 10.0 mmol, 1.0 equiv.) were added and continued at 100 °C for an additional 3 h to form the N-alkylated intermediate **B**. After that, DMU:Tartaric acid (7:3) (300 mg) and alcohol **4a** (4.14 g, 30.0 mmol, 1.0 equiv.) were sequentially added, and the reaction was continued at 100 °C for 7 h. The entire reaction process was monitored by TLC. Upon completion of the reaction, the reaction mixture was cooled to RT, quenched with water (500 ml), and extracted with ethyl acetate (300 ml x 2). The combined organic layer was dried over anhydrous Na<sub>2</sub>SO<sub>4</sub>, and the crude reaction mixture was purified by silica gel column chromatography using 15% EtOAc/Pet ether as eluent, yielding 78% of the desired products (**6a**).

## 3. Spectral Data for the Synthesized Compounds

### (E)-6-Chloro-1-(2-oxo-2-phenylethyl)-4-phenyl-3-(3-(p-tolyl)acryloyl)quinolin-2(1H)-one

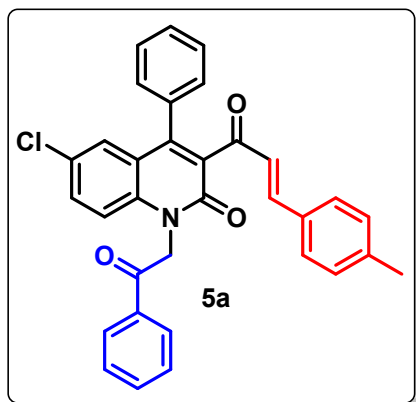

(**5a**). Purification was carried out by column chromatography on silica gel using a 13% ethyl acetate/Pet ether mixture, resulting in the isolation of **5a** as a Pale yellow solid (81% yield) mp: 265-267 °C; <sup>1</sup>H NMR (400 MHz, CDCl<sub>3</sub>) δ 8.14 – 8.08 (m, 2H), 7.68 (t, *J* = 7.4 Hz, 1H), 7.56 (t, *J* = 7.7 Hz, 2H), 7.49 – 7.40 (m, 4H), 7.36 – 7.31 (m, 6H), 7.26 (s, 2H), 7.13 (d, *J* = 7.9 Hz, 1H), 7.03 (d, *J* = 9.0 Hz, 1H), 6.67 (d, *J* = 16.2 Hz, 1H), 5.88 (s, 2H), 2.34 (s, 3H). <sup>13</sup>C NMR (101 MHz, CDCl<sub>3</sub>) δ 193.1, 192.1, 159.4, 147.6, 146.0, 141.3,

138.1, 134.7, 134.3, 133.5, 131.9, 131.6, 131.4, 129.6, 129.2, 129.1, 128.7, 128.6, 128.3, 128.2,

128.0, 126.2, 122.1, 115.9, 48.9, 21.5. **FT-IR:**  $\nu = 3057, 2918, 1698, 1641, 1554, 1420, 1223, 1065, 962, 812, 754, 710, 553 \text{ cm}^{-1}$ . **HRMS (ESI)** calcd for  $\text{C}_{33}\text{H}_{24}\text{ClNO}_3\text{Na}$  requires  $(\text{M} + \text{Na})^+$  540.1342; found: 540.1345.

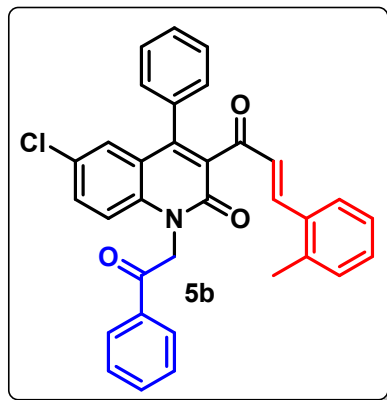

**(E)-6-Chloro-1-(2-oxo-2-phenylethyl)-4-phenyl-3-(3-(o-tolyl)acryloyl)quinolin-2(1H)-one (5b).** Purification was carried out by column chromatography on silica gel using a 14% ethyl acetate/Pet ether mixture, resulting in the isolation of **5b** as a Pale yellow solid (76% yield) mp: 263-265 °C; **<sup>1</sup>H NMR (400 MHz, CDCl<sub>3</sub>)**  $\delta$  8.10 (d,  $J = 7.6 \text{ Hz}$ , 2H), 7.71 – 7.63 (m, 2H), 7.55 (t,  $J = 7.5 \text{ Hz}$ , 2H), 7.43 (d,  $J = 12.1 \text{ Hz}$ , 5H), 7.34 (d,  $J = 5.2 \text{ Hz}$ , 3H), 7.22 (d,  $J = 7.4 \text{ Hz}$ , 1H), 7.13 (d,  $J = 6.9 \text{ Hz}$ , 2H), 7.03 (d,  $J = 9.0 \text{ Hz}$ , 1H), 6.63 (d,  $J = 16.1 \text{ Hz}$ ,

1H), 5.88 (s, 2H), 2.32 (s, 3H). **<sup>13</sup>C NMR (101 MHz, CDCl<sub>3</sub>)**  $\delta$  193.1, 191.9, 159.4, 147.7, 143.2, 138.2, 138.1, 134.7, 134.3, 133.5, 133.3, 131.9, 131.5, 130.7, 130.4, 129.3, 129.2, 129.1, 128.7, 128.3, 128.2, 128.1, 128.0, 126.8, 126.3, 122.1, 120.9, 115.8, 48.9, 19.8. **FT-IR:**  $\nu = 1696, 1637, 1555, 1427, 1225, 1067, 960, 821, 752, 688, 541 \text{ cm}^{-1}$ . **HRMS (ESI)** calcd for  $\text{C}_{33}\text{H}_{24}\text{ClNO}_3\text{Na}$  requires  $(\text{M} + \text{Na})^+$  540.1342; found: 540.1370.

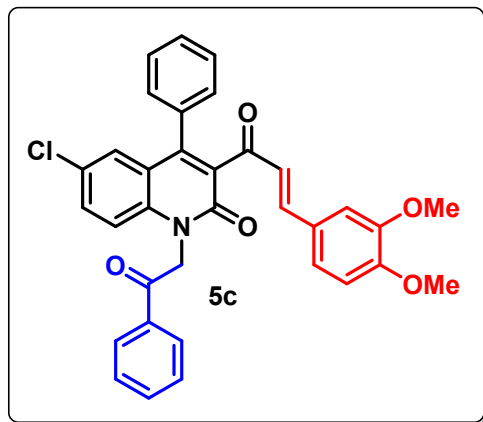

**(E)-6-Chloro-3-(3-(3,4-dimethoxyphenyl)acryloyl)-1-(2-oxo-2-phenylethyl)-4-phenylquinolin-2(1H)-one (5c).** Purification was carried out by column chromatography on silica gel using a 17% ethyl acetate/Pet ether mixture, resulting in the isolation of **5c**

as a Pale yellow solid (79% yield) mp: 272-274 °C; **<sup>1</sup>H NMR (400 MHz, CDCl<sub>3</sub>)**  $\delta$  8.03 (d,  $J = 7.6 \text{ Hz}$ , 2H), 7.61 (t,  $J = 7.2 \text{ Hz}$ , 1H), 7.49 (t,  $J = 7.5 \text{ Hz}$ , 3H), 7.41 – 7.34 (m, 4H), 7.25 (dd,  $J = 10.7, 8.1 \text{ Hz}$ , 4H), 6.95 (d,  $J = 8.3 \text{ Hz}$ , 2H), 6.88 (s, 1H), 6.74 (d,  $J = 8.3 \text{ Hz}$ , 1H), 6.53 (d,  $J = 16.1 \text{ Hz}$ , 1H), 5.82 (s, 2H), 3.82 (s, 3H), 3.79 (s, 3H). **<sup>13</sup>C NMR (101 MHz, CDCl<sub>3</sub>)**  $\delta$  193.0, 192.1, 151.6, 149.1, 147.6, 146.1, 138.1, 134.7, 134.4, 133.6, 131.9, 131.9, 131.4, 129.2, 129.1, 128.7, 128.3, 128.2, 128.0, 127.3, 125.2, 123.5, 122.2, 115.9, 110.9, 110.0, 56.0, 55.9, 48.9. **FT-IR:**  $\nu = 1715, 1639, 1594, 1483,$

1246, 1109, 1019, 945, 750, 707, 546  $\text{cm}^{-1}$ . **HRMS (ESI)** calcd for  $\text{C}_{34}\text{H}_{26}\text{ClNO}_5\text{Na}$  requires  $(\text{M} + \text{Na})^+$  586.1397; found: 586.1397.

**(E)-6-Chloro-3-(3-(4-chlorophenyl)acryloyl)-1-(2-oxo-2-phenylethyl)-4-phenylquinolin-**

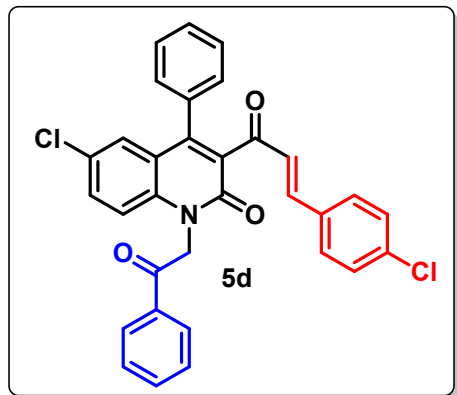

**2(1H)-one (5d)**. Purification was carried out by column chromatography on silica gel using a 12% ethyl acetate/Pet ether mixture, resulting in the isolation of **5d** as a Colourless solid (77% yield) mp: 245-247  $^{\circ}\text{C}$ ;  **$^1\text{H}$  NMR (400 MHz,  $\text{CDCl}_3$ )**  $\delta$  8.11 (d,  $J = 7.5$  Hz, 2H), 7.67 (t,  $J = 7.2$  Hz, 1H), 7.55 (t,  $J = 7.3$  Hz, 2H), 7.43 (d,  $J = 5.1$  Hz, 4H), 7.33 (dd,  $J = 14.7, 8.2$  Hz, 8H), 7.03 (d,  $J = 8.9$  Hz, 1H), 6.68 (d,  $J = 16.2$  Hz, 1H), 5.87 (s, 2H).  **$^{13}\text{C}$  NMR**

**(101 MHz,  $\text{CDCl}_3$ )**  $\delta$  192.6, 192.0, 159.4, 148.0, 143.8, 138.1, 136.6, 134.7, 134.3, 133.5, 132.9, 131.6, 131.6, 129.6, 129.2, 129.1, 129.1, 129.1, 128.7, 128.4, 128.2, 128.1, 127.4, 122.1, 115.9, 48.9. **FT-IR:**  $\nu = 1637, 1489, 1367, 1226, 1089, 958, 753, 685, 518$   $\text{cm}^{-1}$ . **HRMS (ESI)** calcd for  $\text{C}_{32}\text{H}_{21}\text{Cl}_2\text{NO}_3\text{Na}$  requires  $(\text{M} + \text{Na})^+$  560.0796; found: 560.0796.

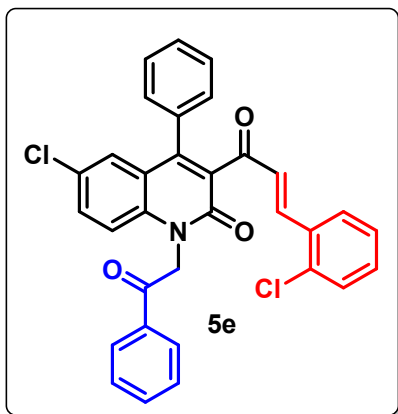

**(E)-6-Chloro-3-(3-(2-chlorophenyl)acryloyl)-1-(2-oxo-2-phenylethyl)-4-phenylquinolin-2(1H)-one (5e)**. Purification

was carried out by column chromatography on silica gel using an 11% ethyl acetate/Pet ether mixture, resulting in the isolation of **5e** as a Colourless solid (73% yield) mp: 243-245  $^{\circ}\text{C}$ ;  **$^1\text{H}$  NMR (400 MHz,  $\text{CDCl}_3$ )**  $\delta$  8.10 (d,  $J = 7.7$  Hz, 2H), 7.77 (d,  $J = 16.3$  Hz, 1H), 7.66 (t,  $J = 7.3$  Hz, 1H), 7.53 (dd,  $J = 13.0, 5.2$  Hz, 3H), 7.46 (dd,  $J = 14.8, 8.3$  Hz, 5H), 7.38 – 7.31 (m, 4H), 7.23 (dt,  $J = 14.8, 7.9$  Hz, 3H), 7.04 (d,  $J = 9.0$

Hz, 1H), 6.67 (d,  $J = 16.2$  Hz, 1H), 5.87 (s, 2H).  **$^{13}\text{C}$  NMR (101 MHz,  $\text{CDCl}_3$ )**  $\delta$  193.0, 191.9, 159.4, 148.0, 141.3, 138.2, 135.3, 134.7, 134.3, 133.4, 132.6, 131.6, 131.4, 131.3, 130.1, 129.4, 129.3, 129.2, 129.0, 128.7, 128.3, 128.2, 128.1, 127.9, 127.0, 122.0, 116.0, 48.9. **FT-IR:**  $\nu = 1642, 1555, 1419, 1224, 1087, 959, 754, 687, 552$   $\text{cm}^{-1}$ . **HRMS (ESI)** calcd for  $\text{C}_{32}\text{H}_{21}\text{Cl}_2\text{NO}_3\text{Na}$  requires  $(\text{M} + \text{Na})^+$  560.0796; found: 560.0797.

**(E)-6-Chloro-3-(3-(2-chlorophenyl)acryloyl)-1-(2-(4-methoxyphenyl)-2-oxoethyl)-4-**

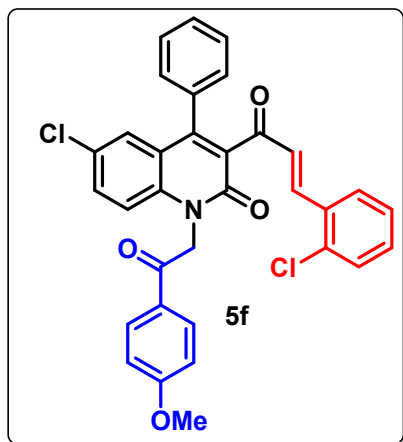

**phenylquinolin-2(1H)-one (5f).** Purification was carried out by column chromatography on silica gel using an 11% ethyl acetate/Pet ether mixture, resulting in the isolation of **5f** as a Colourless solid (75% yield) mp: 240-242 °C;  $^1\text{H NMR}$  (400 MHz,  $\text{CDCl}_3$ )  $\delta$  8.08 (d,  $J = 8.5$  Hz, 2H), 7.77 (d,  $J = 16.2$  Hz, 1H), 7.51 (d,  $J = 7.3$  Hz, 1H), 7.48 – 7.41 (m, 4H), 7.39 – 7.31 (m, 4H), 7.25 – 7.18 (m, 2H), 7.03 (dd,  $J = 17.0, 8.8$  Hz, 3H), 6.68 (d,  $J = 16.2$  Hz, 1H), 5.83 (s, 2H), 3.90 (s, 3H).  $^{13}\text{C NMR}$  (101 MHz,  $\text{CDCl}_3$ )  $\delta$  193.0, 190.2, 164.4, 159.4, 147.9, 141.2,

138.8, 135.2, 133.4, 132.6, 131.6, 131.3, 130.6, 130.0, 129.6, 129.4, 129.2, 128.7, 128.4, 128.3, 128.0, 127.9, 127.7, 127.2, 127.0, 122.0, 116.1, 114.2, 55.6, 48.6. **FT-IR:**  $\nu = 1700, 1633, 1488, 1369, 1224, 1089, 960, 752, 687, 544$   $\text{cm}^{-1}$ . **HRMS (ESI)** calcd for  $\text{C}_{33}\text{H}_{23}\text{Cl}_2\text{NO}_4\text{Na}$  requires (M + Na) $^+$  590.0902; found: 590.0903.

**(E)-6-Chloro-1-(2-(4-chlorophenyl)-2-oxoethyl)-3-(3-(4-chlorophenyl)acryloyl)-4-**

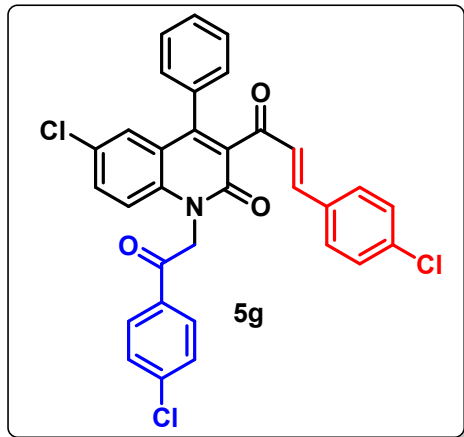

**phenylquinolin-2(1H)-one (5g).** Purification was carried out by column chromatography on silica gel using a 12% ethyl acetate/Pet ether mixture, resulting in the isolation of **5g** as a Colourless solid (78% yield) mp: 237-239 °C;  $^1\text{H NMR}$  (400 MHz,  $\text{CDCl}_3$ )  $\delta$  8.08 (s, 2H), 7.55 (d,  $J = 5.9$  Hz, 2H), 7.46 (d,  $J = 3.9$  Hz, 4H), 7.39 – 7.34 (m, 4H), 7.34 – 7.30 (m, 4H), 7.28 (s, 2H), 6.69 (d,  $J = 16.2$  Hz, 1H), 5.85 (s, 2H).  $^{13}\text{C NMR}$  (101 MHz,  $\text{CDCl}_3$ )  $\delta$  192.7, 191.1, 159.4, 148.1, 144.0, 141.0, 138.0, 136.7, 133.4,

132.9, 132.8, 131.7, 131.5, 129.7, 129.5, 129.3, 129.1, 129.1, 128.7, 128.5, 128.2, 127.31, 122.1, 115.8, 48.8. **FT-IR:**  $\nu = 1700, 1637, 1594, 1427, 1366, 1224, 1085, 956, 752, 686, 550$   $\text{cm}^{-1}$ .

**HRMS (ESI)** calcd for  $\text{C}_{32}\text{H}_{20}\text{Cl}_3\text{NO}_3\text{Na}$  requires (M + Na) $^+$  594.0406; found: 594.0408.

**(E)-6-Chloro-1-(2-(4-chlorophenyl)-2-oxoethyl)-3-(3-(4-fluorophenyl)acryloyl)-4-**

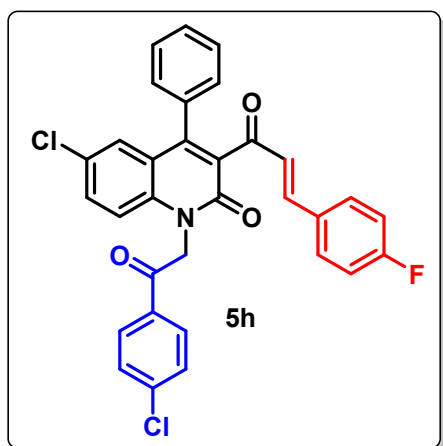

**phenylquinolin-2(1H)-one (5h).** Purification was carried out by column chromatography on

silica gel using an 11% ethyl acetate/Pet ether mixture, resulting in the isolation of **5h** as a Pale yellow solid (74% yield) mp: 230-232 °C; <sup>1</sup>H NMR (400 MHz, CDCl<sub>3</sub>) δ 8.05 (d, *J* = 8.4 Hz, 2H), 7.53 (d, *J* = 8.4 Hz, 2H), 7.48 (dd, *J* = 9.0, 2.3 Hz, 2H), 7.45 – 7.39 (m, 5H), 7.35 – 7.29 (m, 4H), 7.02 (t, *J* = 8.5 Hz, 3H), 6.63 (d, *J* = 16.2 Hz, 1H), 5.83 (s, 2H). <sup>13</sup>C NMR (101 MHz, CDCl<sub>3</sub>) δ 192.7, 191.1, 159.4, 148.0, 144.3, 138.0 (d, *J* = 29.8 Hz), 132.9 (d, *J* = 46.8 Hz), 131.6, 130.5, 130.4, 129.6, 129.5, 129.3, 129.1 (d, *J* = 14.1 Hz), 128.5, 128.2, 126.7, 122.1, 116.15, 116.1 (d, *J* = 22.2 Hz), 115.8, 48.8. <sup>19</sup>F NMR (377 MHz, CDCl<sub>3</sub>) δ -108.7 (s, 1F). HRMS (ESI) calcd for C<sub>32</sub>H<sub>20</sub>Cl<sub>2</sub>FNO<sub>3</sub>Na requires (M + Na)<sup>+</sup> 578.0702; found: 578.0703.

**(E)-1-benzyl-6-chloro-3-(3-(2-chlorophenyl)acryloyl)-4-phenylquinolin-2(1H)-one (5i)**. Purification

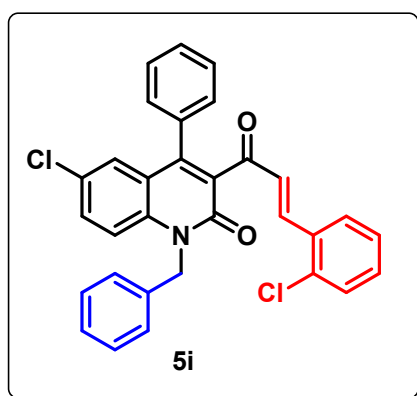

was carried out by column chromatography on silica gel using a 13% ethyl acetate/Pet ether mixture, resulting in the isolation of **5i** as a Colourless solid (79% yield) mp: 241-243 °C; <sup>1</sup>H NMR (400 MHz, CDCl<sub>3</sub>) δ 8.39 – 8.32 (m, 2H), 8.13 (d, *J* = 7.4 Hz, 2H), 7.81 (d, *J* = 16.3 Hz, 1H), 7.72 (t, *J* = 7.4 Hz, 1H), 7.59 (t, *J* = 7.7 Hz, 2H), 7.51 (dd, *J* = 7.3, 3.9 Hz, 4H), 7.40 (dd, *J* = 11.6, 6.1 Hz, 3H), 7.33 – 7.30 (m, 1H), 7.23 (dd, *J* = 17.3, 8.4 Hz, 2H), 6.68 (d, *J* = 16.3 Hz, 1H),

5.96 (s, 2H). <sup>13</sup>C NMR (101 MHz, CDCl<sub>3</sub>) δ 192.4, 191.2, 159.5, 148.6, 143.5, 142.6, 141.8, 135.3, 134.6, 134.4, 132.6, 132.4, 132.1, 131.6, 130.1, 129.8, 129.3, 129.2, 129.0, 128.9, 128.3, 127.9, 127.1, 126.0, 124.9, 120.7, 115.5, 49.2. FT-IR: ν = 3060, 2931, 1697, 1637, 1553, 1485, 1418, 1227, 1090, 958, 753, 687, 548 cm<sup>-1</sup>. HRMS (ESI) calcd for C<sub>31</sub>H<sub>22</sub>Cl<sub>2</sub>NO<sub>2</sub>K requires (M + K)<sup>+</sup> 549.0665; found: 549.0667.

**(E)-6-Chloro-3-(3-(4-nitrophenyl)acryloyl)-1-(2-oxo-2-phenylethyl)-4-phenylquinolin-**

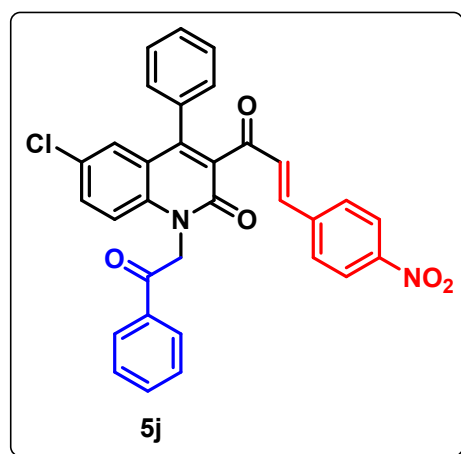

**2(1H)-one (5j)**. Purification was carried out by column chromatography on silica gel using a 15% ethyl acetate/Pet ether mixture, resulting in the isolation of **5j** as a Yellow solid (71% yield) mp: 267-269 °C; <sup>1</sup>H NMR (400 MHz, CDCl<sub>3</sub>) δ 8.17 (d, *J* = 8.4 Hz, 2H), 8.11 (d, *J* = 7.6 Hz, 2H), 7.70 (dd, *J* = 14.2, 7.0 Hz, 1H), 7.59 – 7.54 (m, 4H), 7.49 – 7.42 (m, 5H), 7.38 (s, 1H), 7.33 (d, *J* = 7.4



Hz, 3H), 6.84 (d,  $J = 16.2$  Hz, 1H), 5.89 (s, 2H).  $^{13}\text{C}$  NMR (101 MHz,  $\text{CDCl}_3$ )  $\delta$  192.2, 191.9, 159.5, 148.7, 148.6, 141.5, 140.6, 138.2, 134.5, 134.5, 133.4, 131.9, 131.2, 130.2, 129.4, 129.1, 129.0, 128.8, 128.5, 128.2, 124.0, 122.0, 115.9, 48.9. FT-IR:  $\nu = 2938, 1711, 1639, 1596, 1459, 1243, 1105, 1019, 948, 754, 709, 546$   $\text{cm}^{-1}$ . HRMS (ESI) calcd for  $\text{C}_{32}\text{H}_{22}\text{ClN}_2\text{O}_5$  requires  $(\text{M} + \text{H})^+$  549.1217; found: 549.1219.

**(E)-4-(3-(6-Chloro-2-oxo-1-(2-oxo-2-phenylethyl)-4-phenyl-1,2-dihydroquinolin-3-yl)-3-**

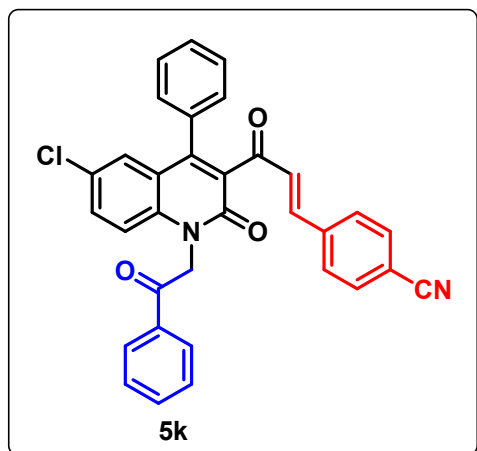

**oxoprop-1-en-1-yl)benzonitrile (5k).** Purification was carried out by column chromatography on silica gel using a 15% ethyl acetate/Pet ether mixture, resulting in the isolation of **5k** as a Yellow solid (68% yield) mp: 254-256 °C;  $^1\text{H}$  NMR (400 MHz,  $\text{CDCl}_3$ )  $\delta$  7.62 (d, 2H), 7.60 (d, 1H), 7.56 (d,  $J = 4.5$  Hz, 2H), 7.53 (d,  $J = 6.7$  Hz, 1H), 7.49 (d,  $J = 5.5$  Hz, 1H), 7.45 (d,  $J = 1.9$  Hz, 2H), 7.38 (d,  $J = 8.4$  Hz, 2H), 7.33 (d,  $J = 2.1$  Hz, 2H), 7.31 (d,  $J = 2.3$  Hz, 1H), 7.08 – 7.03 (m, 3H), 6.83 – 6.79

(m, 1H), 6.78 (d,  $J = 2.2$  Hz, 1H), 5.88 (s, 2H).  $^{13}\text{C}$  NMR (101 MHz,  $\text{CDCl}_3$ )  $\delta$  192.3, 191.9, 159.4, 150.0, 148.6, 142.8, 142.2, 138.8, 138.2, 137.1, 136.6, 136.1, 135.1, 134.5, 133.4, 132.8, 132.5, 130.1, 129.6, 129.3, 129.1, 128.8, 128.2, 122.0, 118.4, 115.9, 113.5, 48.9. FT-IR:  $\nu = 3372, 2227, 1696, 1634, 1447, 1366, 1227, 1073, 988, 752$   $\text{cm}^{-1}$ . HRMS (ESI) calcd for  $\text{C}_{33}\text{H}_{22}\text{ClN}_2\text{O}_3$  requires  $(\text{M} + \text{H})^+$  529.1319; found: 529.1319.

**(E)-3-(3-(2-Chlorophenyl)acryloyl)-1-(2-oxo-2-phenylethyl)-4-phenylquinolin-2(1H)-one**

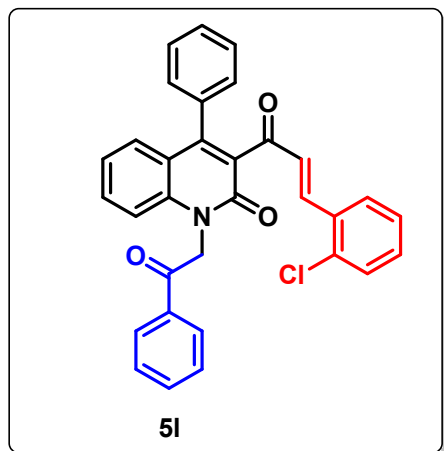

**(5l).** Purification was carried out by column chromatography on silica gel using a 13% ethyl acetate/Pet ether mixture, resulting in the isolation of **5l** as a Colourless solid (79% yield) mp: 215-217 °C;  $^1\text{H}$  NMR (400 MHz,  $\text{CDCl}_3$ )  $\delta$  8.12 (d,  $J = 7.4$  Hz, 2H), 7.79 (d,  $J = 16.2$  Hz, 1H), 7.66 (t,  $J = 7.4$  Hz, 1H), 7.53 (dd,  $J = 16.3, 8.4$  Hz, 4H), 7.38 (ddd,  $J = 16.2, 11.8, 7.9$  Hz, 7H), 7.25 – 7.14 (m, 3H), 7.10 (d,  $J = 8.5$  Hz, 1H), 6.70 (d,  $J = 16.2$  Hz, 1H), 5.91 (s, 2H).  $^{13}\text{C}$  NMR (101 MHz,  $\text{CDCl}_3$ )  $\delta$  193.5, 192.2,

159.7, 149.2, 141.0, 139.6, 135.2, 134.8, 134.2, 134.1, 132.8, 131.6, 131.2, 130.3, 130.0, 129.5, 129.5, 129.1, 129.0, 128.9, 128.5, 128.2, 127.9, 127.0, 122.6, 120.8, 114.4, 48.8. **FT-IR:**  $\nu = 1700, 1647, 1598, 1518, 1339, 1228, 1107, 849, 829, 750, 702, 537 \text{ cm}^{-1}$ . **HRMS (ESI)** calcd for  $\text{C}_{32}\text{H}_{23}\text{ClNO}_3$  requires  $(\text{M} + \text{H})^+$  504.1366; found: 504.1369.

**6-Chloro-1-((Z)-1-(4-methoxyphenyl)-3-oxo-3-phenylprop-1-en-2-yl)-3-((E)-3-(4-**

**methoxyphenyl)acryloyl)-4-phenylquinolin-2(1H)-one (6a).** Purification was carried out by

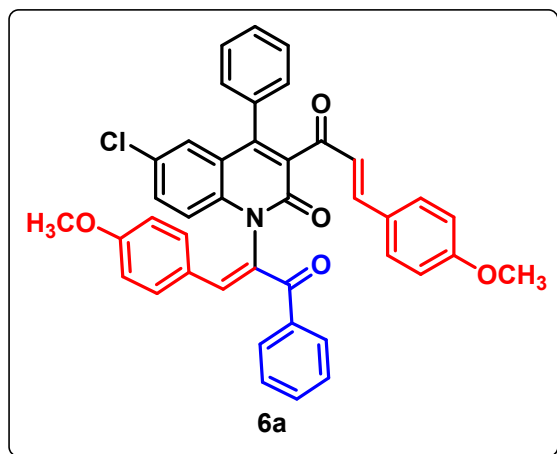

column chromatography on silica gel using a 12% ethyl acetate/Pet ether mixture, resulting in the isolation of **6a** as a Pale yellow solid (81% yield) mp: 270-272 °C;  $^1\text{H NMR}$  (400 MHz,  $\text{CDCl}_3$ )  $\delta$  7.92 (d,  $J = 7.6 \text{ Hz}$ , 2H), 7.55 – 7.49 (m, 2H), 7.43 (d,  $J = 7.5 \text{ Hz}$ , 2H), 7.38 – 7.34 (m, 4H), 7.29 (d,  $J = 8.9 \text{ Hz}$ , 3H), 7.25 (s, 1H), 7.13 (d,  $J = 8.5 \text{ Hz}$ , 2H), 7.06 (d,  $J = 9.6 \text{ Hz}$ , 1H), 6.75 (dd,  $J = 19.4, 9.5 \text{ Hz}$ , 5H), 6.50 (d,  $J = 16.2 \text{ Hz}$ , 1H), 3.72 (s,

3H), 3.71 (s, 3H).  $^{13}\text{C NMR}$  (101 MHz,  $\text{CDCl}_3$ )  $\delta$  193.1, 192.8, 161.9, 161.7, 159.4, 148.5, 146.0, 142.5, 137.8, 137.4, 133.7, 132.4, 132.0, 131.6, 130.6, 130.4, 130.0, 129.6, 129.2, 128.8, 128.7, 128.5, 128.5, 127.8, 127.1, 125.0, 124.3, 122.1, 116.8, 114.7, 114.2, 55.4, 55.4. **FT-IR:**  $\nu = 1638, 1599, 1509, 1422, 1248, 1174, 1019, 826, 709, 545 \text{ cm}^{-1}$ . **HRMS (ESI)** calcd for  $\text{C}_{41}\text{H}_{30}\text{ClNO}_5\text{Na}$  requires  $(\text{M} + \text{Na})^+$  674.1710; found: 674.1715.

**6-Chloro-1-((Z)-3-(4-chlorophenyl)-1-(4-methoxyphenyl)-3-oxoprop-1-en-2-yl)-3-((E)-3-(4-methoxyphenyl)acryloyl)-4-phenylquinolin-2(1H)-one (6b).** Purification was carried out by

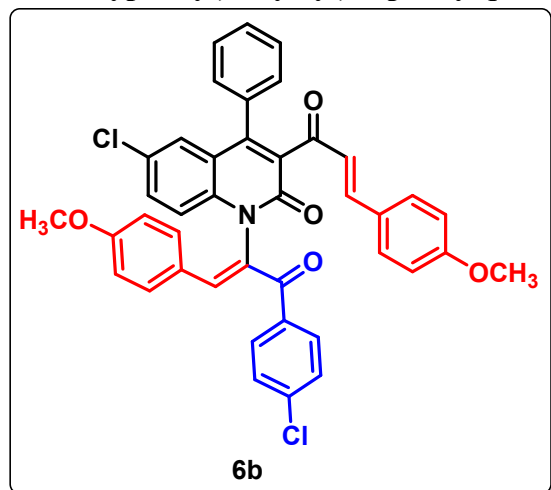

column chromatography on silica gel using a 14% ethyl acetate/Pet ether mixture, resulting in the isolation of **6b** as a Pale yellow solid (79% yield) mp: 275-277 °C;  $^1\text{H NMR}$  (400 MHz,  $\text{CDCl}_3$ )  $\delta$  7.88 (d,  $J = 8.3 \text{ Hz}$ , 2H), 7.47 (s, 1H), 7.38 (dd,  $J = 10.4, 5.8 \text{ Hz}$ , 6H), 7.30 – 7.23 (m, 6H), 7.12 (d,  $J = 8.7 \text{ Hz}$ , 2H), 7.04 (d,  $J = 9.6 \text{ Hz}$ , 1H), 6.73 (t,  $J = 9.4 \text{ Hz}$ , 4H), 6.48 (d,  $J = 16.2 \text{ Hz}$ , 1H), 3.72 (s, 3H), 3.70 (s, 3H).  $^{13}\text{C NMR}$  (101 MHz,  $\text{CDCl}_3$ )  $\delta$  192.6,

192.1, 162.0, 161.9, 159.4, 148.6, 146.1, 142.1, 138.8, 137.3, 136.1, 133.6, 132.6, 132.0, 131.7, 131.4, 130.4, 129.5, 129.2, 128.8, 128.8, 128.7, 128.7, 127.9, 127.1, 125.0, 124.1, 122.1, 116.8, 114.8, 114.3, 55.4, 55.4. **FT-IR:**  $\nu = 1640, 1599, 1445, 1245, 1174, 1024, 753, 710, 549 \text{ cm}^{-1}$ . **HRMS (ESI)** calcd for  $\text{C}_{41}\text{H}_{29}\text{Cl}_2\text{NO}_5\text{Na}$  requires  $(\text{M} + \text{Na})^+$  708.1320; found: 708.1321.

**6-Chloro-1-((Z)-1-(3-methoxyphenyl)-3-oxo-3-phenylprop-1-en-2-yl)-3-((E)-3-(3-methoxyphenyl)acryloyl)-4-phenylquinolin-2(1H)-one (6c).** Purification was carried out by

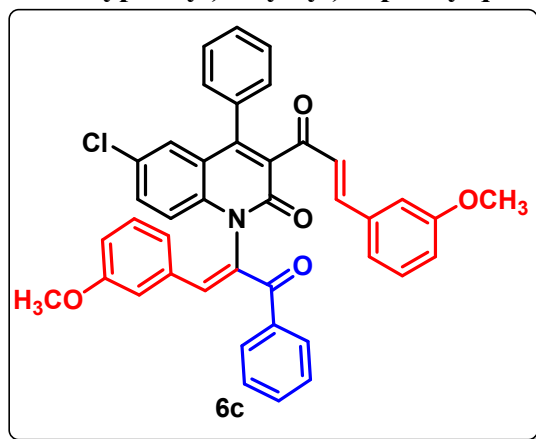

column chromatography on silica gel using a 17% ethyl acetate/Pet ether mixture, resulting in the isolation of **6c** as a Pale yellow solid (80% yield) mp: 258-260 °C;  $^1\text{H NMR}$  (400 MHz,  $\text{CDCl}_3$ )  $\delta$  78.08 (d,  $J = 7.4 \text{ Hz}$ , 2H), 7.92 (s, 1H), 7.70 (d,  $J = 16.4 \text{ Hz}$ , 1H), 7.58 (t,  $J = 7.4 \text{ Hz}$ , 1H), 7.48 (t,  $J = 7.6 \text{ Hz}$ , 2H), 7.42 – 7.33 (m, 5H), 7.28 (d,  $J = 9.1 \text{ Hz}$ , 2H), 7.23 (d,  $J = 2.2 \text{ Hz}$ , 2H), 7.13 (d,  $J = 9.0$

Hz, 1H), 6.87 (t,  $J = 7.6 \text{ Hz}$ , 1H), 6.79 (ddd,  $J = 35.3, 17.9, 9.7 \text{ Hz}$ , 4H), 3.80 (d,  $J = 1.4 \text{ Hz}$ , 5H).  $^{13}\text{C NMR}$  (101 MHz,  $\text{CDCl}_3$ )  $\delta$  193.5, 193.0, 159.8, 158.5, 157.4, 148.4, 141.9, 137.5, 133.7, 133.0, 132.7, 132.2, 132.1, 131.9, 131.3, 130.4, 129.5, 129.1, 129.1, 128.6, 128.5, 128.3, 128.2, 127.8, 127.6, 123.5, 121.9, 121.1, 121.0, 120.6, 117.0, 111.0, 110.7, 55.6, 55.4. **FT-IR:**  $\nu = 1707, 1638, 1484, 1240, 1110, 1018, 943, 755, 709, 541 \text{ cm}^{-1}$ . **HRMS (ESI):**  $\text{C}_{41}\text{H}_{30}\text{ClNO}_5\text{Na}$  requires 674.1710  $(\text{M} + \text{Na})^+$ ; found: 674.1739.

**6-Chloro-1-((Z)-3-(4-chlorophenyl)-1-(3-methoxyphenyl)-3-oxoprop-1-en-2-yl)-3-((E)-3-(3-methoxyphenyl)acryloyl)-4-phenylquinolin-2(1H)-one (6d).** Purification was carried out by

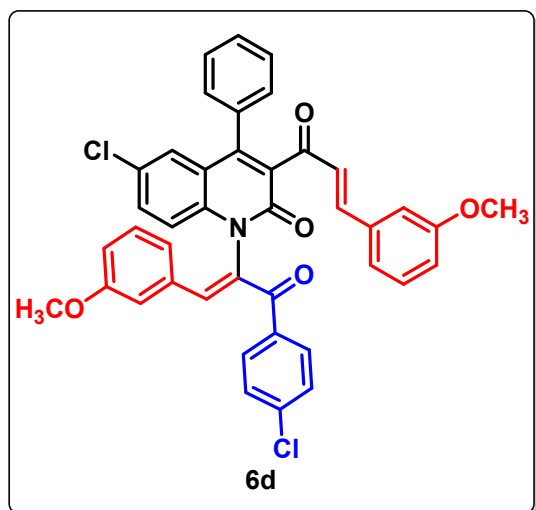

column chromatography on silica gel using a 16% ethyl acetate/Pet ether mixture, resulting in the isolation of **6d** as a Pale yellow solid (76% yield) mp: 262-264 °C;  $^1\text{H NMR}$  (400 MHz,  $\text{CDCl}_3$ )  $\delta$  7.94 (d,  $J = 8.5 \text{ Hz}$ , 2H), 7.47 (s, 1H), 7.41 (d,  $J = 8.5 \text{ Hz}$ , 2H), 7.36 (dd,  $J = 4.8, 3.5 \text{ Hz}$ , 2H), 7.28 – 7.23 (m, 4H), 7.18 (s, 1H), 7.14 (td,  $J = 7.9, 4.8 \text{ Hz}$ , 2H), 7.05 (d,  $J = 8.9 \text{ Hz}$ , 1H), 6.91 (d,  $J = 7.7 \text{ Hz}$ , 1H), 6.80 (ddd,  $J = 12.6, 7.8, 5.5 \text{ Hz}$ , 4H), 6.68 (s,

1H), 6.57 (d,  $J = 16.2$  Hz, 1H), 3.69 (s, 3H), 3.58 (s, 3H).  $^{13}\text{C}$  NMR (101 MHz,  $\text{CDCl}_3$ )  $\delta$  192.6, 192.1, 159.9, 159.8, 159.5, 148.9, 146.1, 141.7, 139.3, 137.3, 135.7, 135.6, 133.4, 132.7, 132.6, 132.2, 131.8, 131.6, 130.2, 129.7, 129.4, 129.3, 128.9, 128.8, 128.8, 128.8, 127.8, 127.3, 122.7, 121.9, 121.3, 117.6, 116.8, 116.8, 113.5, 113.2, 55.3, 55.2. FT-IR:  $\nu = 1705, 1639, 1595, 1447, 1247, 1173, 1025, 830, 755, 709, 550$   $\text{cm}^{-1}$ . HRMS (ESI) calcd for  $\text{C}_{41}\text{H}_{29}\text{Cl}_2\text{NO}_5\text{Na}$  requires  $(\text{M} + \text{Na})^+$  708.1320; found: 708.1351.

**6-Chloro-1-((Z)-1-(2,4-dimethoxyphenyl)-3-oxo-3-phenylprop-1-en-2-yl)-3-((E)-3-(2,4-dimethoxyphenyl)acryloyl)-4-phenylquinolin-2(1H)-one (6e)**. Purification was carried out by

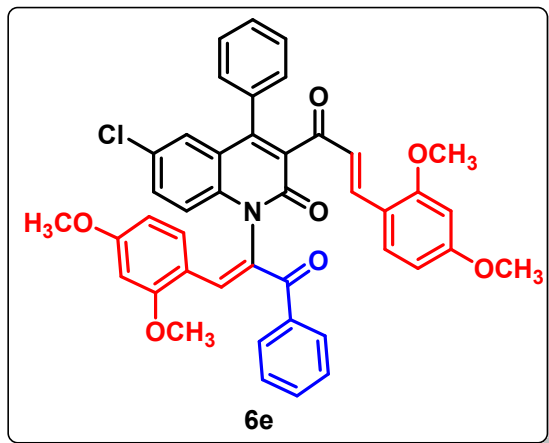

column chromatography on silica gel using a 18% ethyl acetate/Pet ether mixture, resulting in the isolation of **6e** as a Pale yellow solid (78% yield) mp: 280-282  $^{\circ}\text{C}$ ;  $^1\text{H}$  NMR (400 MHz,  $\text{CDCl}_3$ )  $\delta$  8.06 (dd,  $J = 29.3, 7.3$  Hz, 3H), 7.95 (s, 1H), 7.65 (d,  $J = 3.3$  Hz, 1H), 7.63 – 7.54 (m, 2H), 7.48 (d,  $J = 7.7$  Hz, 2H), 7.40 (dd,  $J = 7.7, 4.6$  Hz, 4H), 7.35 – 7.28 (m, 4H), 7.13 (dd,  $J = 8.7, 6.2$  Hz, 2H), 6.66

(d,  $J = 16.3$  Hz, 1H), 6.43 – 6.30 (m, 4H), 3.77 (t,  $J = 7.7$  Hz, 12H).  $^{13}\text{C}$  NMR (101 MHz,  $\text{CDCl}_3$ )  $\delta$  193.5, 193.1, 163.3, 163.2, 160.1, 159.7, 159.4, 159.42, 148.0, 142.1, 138.0, 137.5, 137.1, 133.9, 132.7, 132.3, 131.3, 130.7, 130.2, 130.0, 129.6, 129.3, 128.9, 128.5, 128.4, 128.2, 128.1, 127.6, 125.7, 122.1, 117.0, 116.8, 113.9, 105.8, 105.3, 98.3, 98.2, 55.7, 55.5, 55.4, 55.4. FT-IR:  $\nu = 1637, 1597, 1415, 1263, 1206, 1155, 1030, 822, 701, 554$   $\text{cm}^{-1}$ . HRMS (ESI) calcd for  $\text{C}_{43}\text{H}_{34}\text{ClNO}_7\text{Na}$  requires  $(\text{M} + \text{Na})^+$  734.1921; found: 734.1949.

**6-Chloro-1-((Z)-3-(4-chlorophenyl)-1-(2,4-dimethoxyphenyl)-3-oxoprop-1-en-2-yl)-3-((E)-3-(2,4-dimethoxyphenyl)acryloyl)-4-phenylquinolin-2(1H)-one (6f)**. Purification was carried out

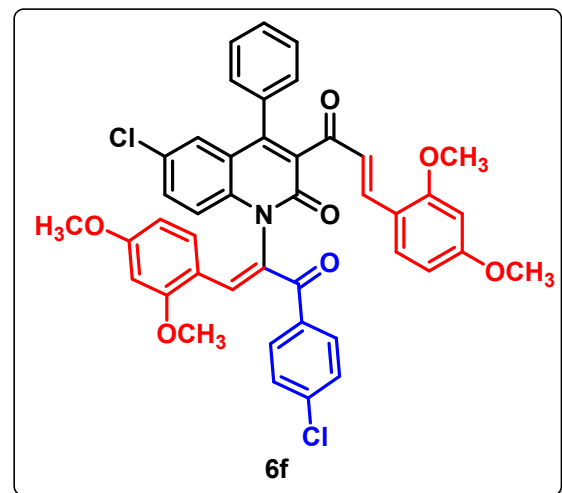

by column chromatography on silica gel using a 17% ethyl acetate/Pet ether mixture, resulting in the isolation of **6f** as a Pale yellow solid (75% yield) mp: 284-286  $^{\circ}\text{C}$ ;  $^1\text{H}$  NMR (400 MHz,  $\text{CDCl}_3$ )  $\delta$  7.98 (d,  $J = 8.4$  Hz, 2H), 7.89 (s, 1H), 7.62 (d,  $J = 16.3$  Hz, 1H), 7.45 (d,  $J = 8.4$  Hz, 3H), 7.43 – 7.38 (m, 4H), 7.35 – 7.28 (m, 3H), 7.10 (dd,

$J = 8.8, 5.5$  Hz, 2H), 6.66 (d,  $J = 16.3$  Hz, 1H), 6.42 (dd,  $J = 8.6, 2.1$  Hz, 1H), 6.36 (s, 2H), 6.31 (dd,  $J = 8.7, 2.1$  Hz, 1H), 3.79 (d,  $J = 2.6$  Hz, 6H), 3.77 (s, 3H), 3.76 (s, 3H).  $^{13}\text{C}$  NMR (101 MHz,  $\text{CDCl}_3$ )  $\delta$  193.4, 192.1, 163.4, 163.2, 160.1, 159.5, 148.1, 142.1, 138.7, 137.3, 136.6, 136.3, 133.8, 132.7, 131.7, 131.3, 130.7, 130.5, 130.0, 129.6, 129.1, 128.6, 128.2, 127.6, 125.6, 122.1, 117.0, 116.7, 113.7, 105.9, 105.3, 98.3, 98.2, 55.7, 55.5, 55.4. FT-IR:  $\nu = 1713, 1633, 1595, 1461, 1243, 1109, 1018, 840, 754, 545$   $\text{cm}^{-1}$ . HRMS (ESI) calcd for  $\text{C}_{43}\text{H}_{33}\text{Cl}_2\text{NO}_7\text{K}$  requires  $(\text{M} + \text{K})^+$  784.1271; found: 784.1273.

**6-Chloro-1-((Z)-1-(3,4-dimethoxyphenyl)-3-oxo-3-phenylprop-1-en-2-yl)-3-((E)-3-(3,4-dimethoxyphenyl)acryloyl)-4-phenylquinolin-2(1H)-one (6g)**. Purification was carried out by

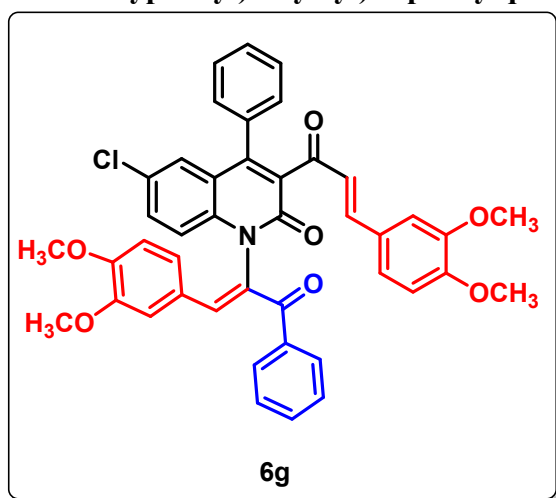

column chromatography on silica gel using a 20% ethyl acetate/Pet ether mixture, resulting in the isolation of **6g** as a Yellow solid (80% yield) mp: 271-273  $^{\circ}\text{C}$ ;  $^1\text{H}$  NMR (400 MHz,  $\text{CDCl}_3$ )  $\delta$  8.05 (d,  $J = 7.3$  Hz, 2H), 7.64 (d,  $J = 10.1$  Hz, 2H), 7.53 (t,  $J = 7.6$  Hz, 2H), 7.50 – 7.43 (m, 3H), 7.36 (dd,  $J = 7.7, 5.5$  Hz, 3H), 7.31 (d,  $J = 3.9$  Hz, 2H), 7.18 (d,  $J = 8.9$  Hz, 1H), 7.02 (d,  $J = 8.2$  Hz, 1H), 6.93 (d,  $J = 9.7$  Hz, 2H), 6.80 (dd,  $J = 8.3, 3.5$  Hz, 3H),

6.59 (d,  $J = 16.1$  Hz, 1H), 3.88 (d,  $J = 6.4$  Hz, 6H), 3.85 (s, 3H), 3.67 (s, 3H).  $^{13}\text{C}$  NMR (101 MHz,  $\text{CDCl}_3$ )  $\delta$  193.2, 192.6, 159.4, 151.6, 151.5, 149.1, 149.1, 148.3, 146.5, 142.6, 137.7, 137.5, 133.5, 132.8, 132.5, 131.8, 130.6, 130.1, 129.3, 129.2, 128.8, 128.7, 128.7, 128.5, 127.6, 127.3, 125.5, 125.1, 124.4, 123.5, 121.9, 116.9, 111.0, 110.9, 110.9, 110.1, 56.0, 55.9, 55.9, 55.6. FT-IR:  $\nu = 2932, 2831, 1676, 1607, 1509, 1242, 1174, 1142, 1032, 827, 706, 542$   $\text{cm}^{-1}$ . HRMS (ESI) calcd for  $\text{C}_{43}\text{H}_{35}\text{ClNO}_7$  requires  $(\text{M} + \text{H})^+$  712.2102; found: 712.2104.

**6-Chloro-1-((Z)-3-(4-chlorophenyl)-3-oxo-1-(p-tolyl)prop-1-en-2-yl)-4-phenyl-3-((E)-3-(p-**

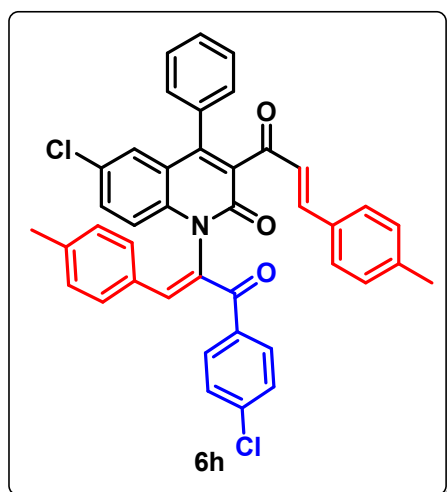

**tolyl)acryloyl)quinolin-2(1H)-one (6h)**. Purification was carried out by column chromatography on silica gel using a 12% ethyl acetate/Pet ether mixture, resulting in the isolation of **6h** as a Pale-yellow solid (78% yield) mp: 245-247  $^{\circ}\text{C}$ ;  $^1\text{H}$  NMR (400 MHz,  $\text{CDCl}_3$ )  $\delta$  8.01 (d,  $J = 8.3$  Hz, 2H), 7.59 (s, 1H), 7.48 (dd,  $J = 16.3, 5.3$  Hz, 6H), 7.36 –

7.28 (m, 6H), 7.19 – 7.11 (m, 7H), 6.66 (d,  $J = 16.2$  Hz, 1H), 2.35 (s, 3H), 2.33 (s, 3H).  $^{13}\text{C}$  NMR (101 MHz,  $\text{CDCl}_3$ )  $\delta$  192.7, 192.2, 159.4, 148.8, 146.3, 142.2, 142.0, 141.3, 139.0, 137.3, 135.9, 133.5, 132.4, 131.7, 131.7, 131.5, 130.0, 129.9, 129.5, 129.5, 129.2, 128.9, 128.8, 128.8, 128.7, 128.6, 127.9, 126.2, 122.0, 116.8, 21.5, 21.5. FT-IR:  $\nu = 3059, 2926, 1698, 1635, 1554, 1420, 1367, 1225, 1070, 961, 751, 709, 553$   $\text{cm}^{-1}$ . HRMS (ESI) calcd for  $\text{C}_{41}\text{H}_{29}\text{Cl}_2\text{NO}_3\text{Na}$  requires  $(\text{M} + \text{Na})^+$  676.1422; found: 676.1424.

**6-Chloro-1-((Z)-1-(2-ethoxyphenyl)-3-oxo-3-phenylprop-1-en-2-yl)-3-((E)-3-(2-**

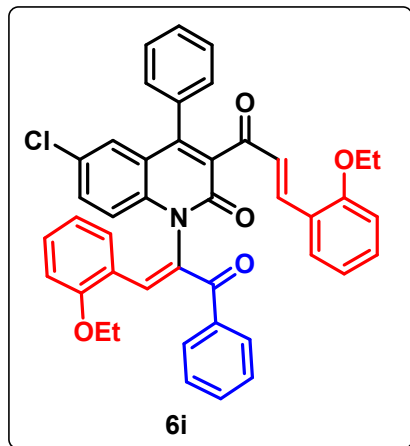

**ethoxyphenyl)acryloyl)-4-phenylquinolin-2(1H)-one (6i).**

Purification was carried out by column chromatography on silica gel using a 11% ethyl acetate/Pet ether mixture, resulting in the isolation of **6i** as a Dark brown solid (76% yield) mp: 271-273  $^{\circ}\text{C}$ ;  $^1\text{H}$  NMR (400 MHz,  $\text{CDCl}_3$ )  $\delta$  8.11 – 8.01 (m, 3H), 7.70 (d,  $J = 16.4$  Hz, 1H), 7.58 (t,  $J = 7.4$  Hz, 1H), 7.48 (t,  $J = 7.6$  Hz, 2H), 7.43 – 7.33 (m, 5H), 7.31 (d,  $J = 2.2$  Hz, 1H), 7.28 – 7.21 (m, 4H), 7.19 (dd,  $J = 13.1, 6.0$  Hz, 2H), 6.89

– 6.78 (m, 4H), 6.74 (t,  $J = 7.5$  Hz, 1H), 4.09 – 3.98 (m, 4H), 1.33 (dt,  $J = 18.3, 6.9$  Hz, 6H).  $^{13}\text{C}$  NMR (101 MHz,  $\text{CDCl}_3$ )  $\delta$  193.2, 192.9, 159.7, 158.0, 157.0, 148.3, 141.8, 138.0, 137.6, 133.8, 132.6, 132.4, 132.1, 131.7, 131.2, 130.3, 129.7, 129.5, 129.2, 129.0, 128.6, 128.5, 128.4, 128.2, 128.2, 127.9, 127.6, 123.7, 121.9, 121.3, 120.9, 120.5, 117.0, 112.0, 111.7, 64.1, 64.0, 14.7, 14.6. FT-IR:  $\nu = 1639, 1594, 1451, 1367, 1302, 1246, 1037, 923, 751, 711, 545$   $\text{cm}^{-1}$ . HRMS (ESI) calcd for  $\text{C}_{43}\text{H}_{34}\text{ClNO}_5\text{Na}$  requires  $(\text{M} + \text{Na})^+$  702.2023; found: 702.2048.

**6-Chloro-1-((Z)-1-(4-(dimethylamino)phenyl)-3-oxo-3-phenylprop-1-en-2-yl)-3-((E)-3-(4-(dimethylamino)phenyl)acryloyl)-4-phenylquinolin-2(1H)-one (6j).**

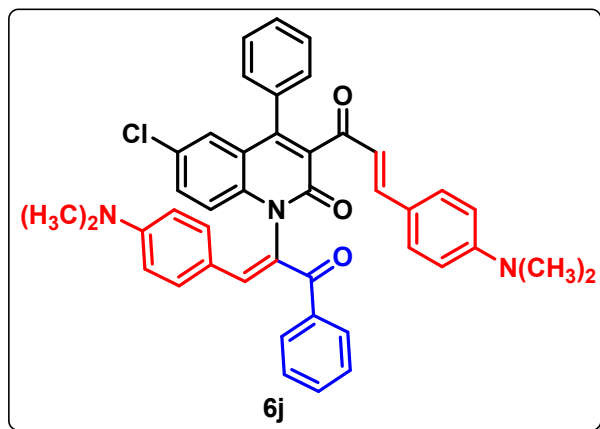

out by column chromatography on silica gel using a 10% ethyl acetate/Pet ether mixture, resulting in the isolation of **6j** as a Dark brown solid (84% yield) mp: 265-267  $^{\circ}\text{C}$ ;  $^1\text{H}$  NMR (400 MHz,  $\text{CDCl}_3$ )  $\delta$  7.87 (d,  $J = 7.1$  Hz, 2H), 7.53 (s, 1H), 7.50 – 7.44 (m, 1H), 7.39 (t,  $J = 7.4$  Hz, 4H), 7.33 (dd,  $J = 5.4, 2.6$  Hz, 2H), 7.29 – 7.25 (m, 2H), 7.23 (dd,  $J = 9.4, 2.2$  Hz,

4H), 7.11 (d,  $J = 9.6$  Hz, 1H), 7.02 (d,  $J = 8.9$  Hz, 2H), 6.52 – 6.40 (m, 5H), 2.89 (s, 12H).  $^{13}\text{C}$  NMR (101 MHz,  $\text{CDCl}_3$ )  $\delta$  193.0, 192.9, 159.3, 152.1, 152.1, 147.8, 147.4, 144.0, 138.6, 137.8, 134.0, 133.3, 132.5, 131.7, 131.4, 130.6, 129.7, 129.6, 129.0, 128.9, 128.6, 128.5, 128.3, 128.1, 127.9, 127.6, 122.6, 122.3, 122.2, 119.0, 117.0, 111.9, 111.6, 40.0, 39.9. FT-IR:  $\nu = 1693, 1641, 1523, 1359, 1161, 1112, 1061, 945, 812, 701, 543$   $\text{cm}^{-1}$ . HRMS (ESI) calcd for  $\text{C}_{43}\text{H}_{36}\text{ClN}_3\text{O}_3\text{Na}$  requires  $(\text{M} + \text{Na})^+ 700.2343$ ; found: 700.2371.

**1-((Z)-1-(4-Bromophenyl)-3-oxo-3-phenylprop-1-en-2-yl)-3-((E)-3-(4-**

**bromophenyl)acryloyl)-6-chloro-4-phenylquinolin-2(1H)-one (6k).** Purification was carried

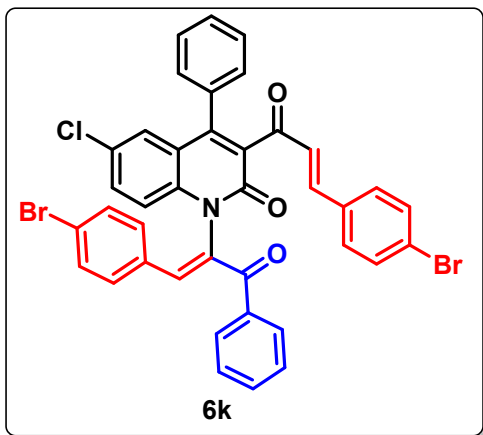

out by column chromatography on silica gel using a 11% ethyl acetate/Pet ether mixture, resulting in the isolation of **6k** as a Colourless solid (75% yield) mp: 255-257  $^{\circ}\text{C}$ ;  $^1\text{H}$  NMR (400 MHz,  $\text{CDCl}_3$ )  $\delta$  7.98 – 7.91 (m, 2H), 7.54 (d,  $J = 8.4$  Hz, 2H), 7.44 (t,  $J = 7.6$  Hz, 3H), 7.38 – 7.34 (m, 6H), 7.29 – 7.23 (m, 3H), 7.19 (t,  $J = 8.4$  Hz, 4H), 7.04 (dd,  $J = 13.4, 8.7$  Hz, 3H), 6.57 (d,  $J = 16.2$  Hz, 1H).  $^{13}\text{C}$  NMR (101 MHz,  $\text{CDCl}_3$ )  $\delta$

192.8, 192.2, 159.4, 149.2, 144.3, 141.1, 137.2, 137.1, 133.3, 133.3, 133.2, 132.9, 132.5, 132.1, 131.9, 130.9, 130.7, 130.0, 129.9, 129.5, 129.4, 128.9, 128.7, 128.6, 128.1, 127.4, 125.6, 125.0, 121.9, 116.6. FT-IR:  $\nu = 1701, 1637, 1418, 1370, 1227, 1064, 964, 814, 690, 553$   $\text{cm}^{-1}$ . HRMS (ESI) calcd for  $\text{C}_{39}\text{H}_{24}\text{Br}_2\text{ClNO}_3\text{Na}$  requires  $(\text{M} + \text{Na})^+ 769.9709$ ; found: 769.9709.

**6-Chloro-1-((Z)-1-(2-chlorophenyl)-3-oxo-3-phenylprop-1-en-2-yl)-3-((E)-3-(2-**

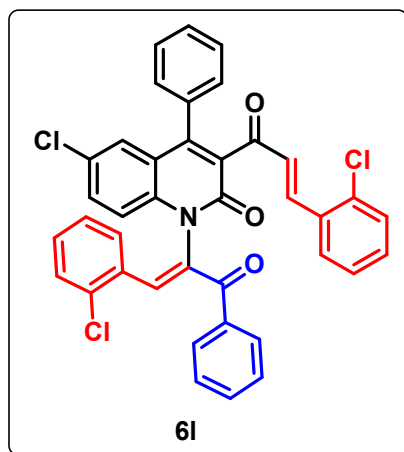

**chlorophenyl)acryloyl)-4-phenylquinolin-2(1H)-one (6l).**

Purification was carried out by column chromatography on silica gel using a 12% ethyl acetate/Pet ether mixture, resulting in the isolation of **6l** as a Colourless solid (71% yield) mp: 267-269  $^{\circ}\text{C}$ ;  $^1\text{H}$  NMR (400 MHz,  $\text{CDCl}_3$ )  $\delta$  8.10 (d,  $J = 7.6$  Hz, 2H), 7.85 (s, 1H), 7.74 (d,  $J = 16.3$  Hz, 1H), 7.50 (t,  $J = 7.9$  Hz, 3H), 7.45 – 7.36 (m, 5H), 7.35 (s, 4H), 7.28 – 7.23 (m, 3H), 7.19 (s, 1H), 7.14 (s, 1H), 6.62 (d,  $J = 16.3$  Hz, 2H).  $^{13}\text{C}$  NMR (101 MHz,  $\text{CDCl}_3$ )  $\delta$  192.6, 192.3, 159.9, 149.1, 141.5,

138.6, 137.5, 136.8, 135.1, 134.9, 133.9, 133.3, 133.1, 132.6, 131.7, 131.4, 131.3, 130.8, 130.3,

130.0, 129.7, 129.5, 129.4, 129.3, 128.9, 128.8, 128.6, 128.5, 128.0, 127.8, 127.4, 127.1, 121.6, 116.8. **FT-IR:**  $\nu = 1637, 1489, 1367, 1226, 1089, 958, 753, 685, 518 \text{ cm}^{-1}$ . **HRMS (ESI)** calcd for  $\text{C}_{39}\text{H}_{24}\text{Cl}_3\text{NO}_3\text{Na}$  requires  $(\text{M} + \text{Na})^+$  682.0719; found: 682.0748.

**6-Chloro-1-((Z)-1-(2-chlorophenyl)-3-(4-chlorophenyl)-3-oxoprop-1-en-2-yl)-3-((E)-3-(2-chlorophenyl)acryloyl)-4-phenylquinolin-2(1H)-one (6m).**

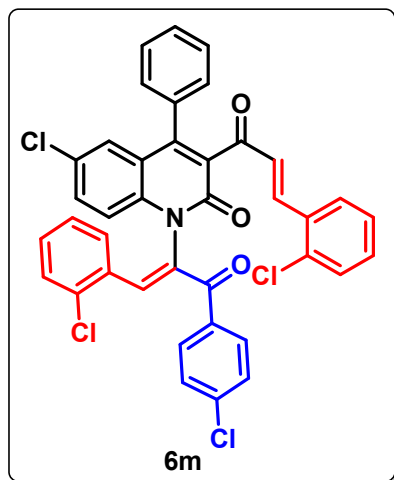

Purification was carried out by column chromatography on silica gel using a 10% ethyl acetate/Pet ether mixture, resulting in the isolation of **6m** as a Colourless solid (69% yield) mp: 271-273 °C; **<sup>1</sup>H NMR (400 MHz, CDCl<sub>3</sub>)**  $\delta$  7.98 (d,  $J = 8.5$  Hz, 2H), 7.75 – 7.63 (m, 2H), 7.41 (d,  $J = 8.5$  Hz, 3H), 7.37 – 7.32 (m, 3H), 7.30 – 7.24 (m, 6H), 7.21 (dd,  $J = 7.4, 1.5$  Hz, 1H), 7.18 – 7.13 (m, 3H), 7.06 (dd,  $J = 14.0, 8.2$  Hz, 2H), 6.54 (d,  $J = 16.3$  Hz, 1H). **<sup>13</sup>C NMR (101 MHz, CDCl<sub>3</sub>)**  $\delta$  192.6,

191.3, 159.9, 149.2, 141.7, 139.7, 138.1, 137.3, 135.1, 134.6, 133.9, 133.2, 132.5, 131.8, 131.6, 131.5, 131.2, 130.6, 130.1, 129.8, 129.4, 129.4, 129.3, 128.9, 128.8, 128.8, 128.6, 128.0, 127.8, 127.5, 127.1, 121.6, 116.7. **FT-IR:**  $\nu = 1693, 1636, 1593, 1555, 1365, 1224, 1088, 752, 686, 553 \text{ cm}^{-1}$ . **HRMS (ESI)** calcd for  $\text{C}_{39}\text{H}_{23}\text{Cl}_4\text{NO}_3\text{Na}$  requires  $(\text{M} + \text{Na})^+$  716.0303; found: 716.0305.

**6-Chloro-1-((Z)-1-(4-fluorophenyl)-3-oxo-3-phenylprop-1-en-2-yl)-3-((E)-3-(4-fluorophenyl)acryloyl)-4-phenylquinolin-2(1H)-one (6n).** Purification was carried out by

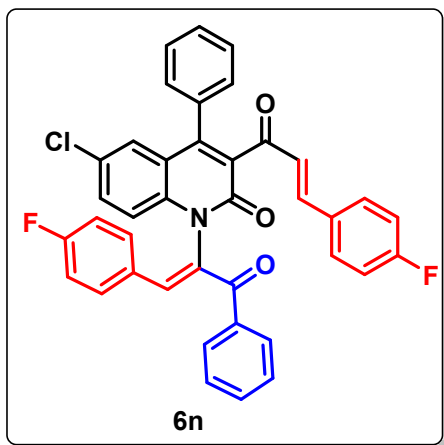

column chromatography on silica gel using a 11% ethyl acetate/Pet ether mixture, resulting in the isolation of **6n** as a Colourless solid (73% yield) mp: 280-282 °C; **<sup>1</sup>H NMR (400 MHz, CDCl<sub>3</sub>)**  $\delta$  8.02 (d,  $J = 7.6$  Hz, 2H), 7.67 – 7.60 (m, 2H), 7.50 (dd,  $J = 15.5, 7.8$  Hz, 4H), 7.40 (dd,  $J = 15.0, 8.9$  Hz, 5H), 7.35 – 7.25 (m, 6H), 7.10 (d,  $J = 8.7$  Hz, 1H), 7.02 – 6.96 (m, 3H), 6.60 (d,  $J = 16.2$  Hz, 1H). **<sup>13</sup>C NMR (101 MHz, CDCl<sub>3</sub>)**  $\delta$  192.9, 192.4, 165.2, 162.7, 162.07,

159.4, 149.1, 141.2 (d,  $J = 336.3$  Hz), 137.2 (d,  $J = 4.0$  Hz), 133.4, 132.8 (d,  $J = 91.9$  Hz), 132.5, 132.2, 131.8 (d,  $J = 2.0$  Hz), 130.6, 130.5, 130.0, 129.8, 129.3 (d,  $J = 25.2$  Hz), 128.8, 128.7 (d,  $J = 2.0$  Hz), 128.6, 128.0, 126.7, 126.37, 122.0, 116.7, 116.4, 115.9 (d,  $J = 21.2$  Hz). **<sup>19</sup>F NMR (377 MHz, CDCl<sub>3</sub>)**  $\delta$  -107.0 (s, 1F), -108.7 (s, 1F). **FT-IR:**  $\nu = 1693, 1641, 1555, 1420,$



1365, 1223, 1063, 960, 827, 687, 550  $\text{cm}^{-1}$ . **HRMS (ESI)** calcd for  $\text{C}_{39}\text{H}_{24}\text{ClF}_2\text{NO}_3\text{Na}$  requires  $(\text{M} + \text{Na})^+$  650.1310; found: 650.1337.

**6-Chloro-1-((Z)-1-(2-ethoxyphenyl)-3-oxo-3-(p-tolyl)prop-1-en-2-yl)-3-((E)-3-(2-**

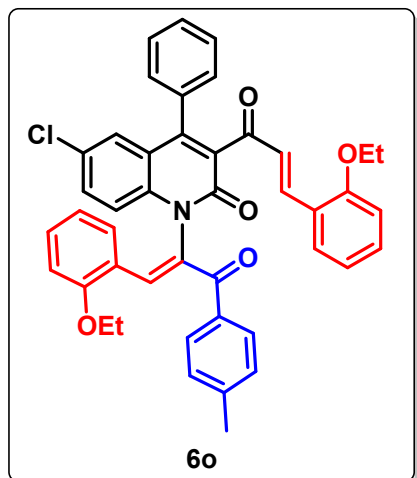

**ethoxyphenyl)acryloyl)-4-phenylquinolin-2(1H)-one (6o).**

Purification was carried out by column chromatography on silica gel using a 15% ethyl acetate/Pet ether mixture, resulting in the isolation of **6o** as a Colourless solid (79% yield) mp: 268-270  $^{\circ}\text{C}$ ;  $^1\text{H NMR}$  (400 MHz,  $\text{CDCl}_3$ )  $\delta$  8.03 – 7.99 (m, 3H), 7.72 (d,  $J = 16.4$  Hz, 1H), 7.55 – 7.50 (m, 1H), 7.43 (dt,  $J = 6.4, 3.3$  Hz, 2H), 7.41 – 7.36 (m, 3H), 7.34 – 7.29 (m, 4H), 7.28 (s, 1H), 7.25 (d,  $J = 3.9$  Hz, 1H), 7.21 (dd,  $J = 10.5, 5.1$  Hz, 2H), 6.92 – 6.80 (m, 4H), 6.76 (t,  $J =$

7.6 Hz, 1H), 4.06 (ddd,  $J = 11.8, 9.5, 4.0$  Hz, 4H), 2.46 (s, 3H), 1.40 (t,  $J = 7.0$  Hz, 3H), 1.32 (dd,  $J = 18.0, 11.0$  Hz, 3H).  $^{13}\text{C NMR}$  (101 MHz,  $\text{CDCl}_3$ )  $\delta$  193.3, 192.6, 159.7, 158.0, 156.9, 148.3, 143.3, 141.8, 137.8, 137.6, 134.8, 133.8, 132.7, 132.4, 131.9, 131.8, 131.2, 130.6, 129.7, 129.5, 129.2, 129.1, 129.0, 128.6, 128.5, 128.4, 128.1, 127.9, 127.5, 123.6, 121.8, 121.3, 120.9, 120.4, 117.0, 111.9, 111.6, 64.0, 64.0, 21.7, 14.8, 14.6. **FT-IR:**  $\nu = 2921, 2832, 1685, 1608, 1508, 1392, 1240, 1182, 1119, 997, 802, 702, 547, 492$   $\text{cm}^{-1}$ . **HRMS (ESI)** calcd for  $\text{C}_{44}\text{H}_{37}\text{ClNO}_5$  requires  $(\text{M} + \text{H})^+$  694.2360; found: 694.2362.

**1-((Z)-1-(2-Chlorophenyl)-3-oxo-3-phenylprop-1-en-2-yl)-3-((E)-3-(2-**

**chlorophenyl)acryloyl)-6-nitro-4-phenylquinolin-2(1H)-one (6p).**

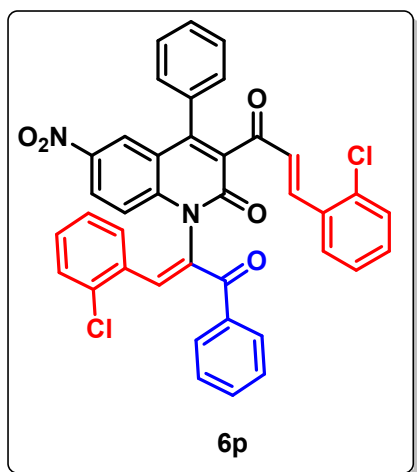

by column chromatography on silica gel using a 13% ethyl acetate/Pet ether mixture, resulting in the isolation of **6p** as a Colourless solid (73% yield) mp: 245-247  $^{\circ}\text{C}$ ;  $^1\text{H NMR}$  (400 MHz,  $\text{CDCl}_3$ )  $\delta$  8.28 – 8.22 (m, 2H), 8.14 (d,  $J = 7.4$  Hz, 2H), 7.92 (s, 1H), 7.78 (d,  $J = 16.3$  Hz, 1H), 7.67 (t,  $J = 7.4$  Hz, 1H), 7.59 – 7.48 (m, 6H), 7.36 (dd,  $J = 17.8, 8.3$  Hz, 6H), 7.32 – 7.29 (m, 1H), 7.26 (dd,  $J = 14.0, 6.5$  Hz, 2H), 7.17 (t,  $J = 7.5$  Hz, 1H), 6.65 (d,  $J = 16.3$  Hz, 1H).  $^{13}\text{C NMR}$  (101 MHz,  $\text{CDCl}_3$ )  $\delta$  192.0, 191.9, 190.3, 160.1, 149.6, 143.0,

142.8, 142.0, 139.1, 136.5, 135.2, 134.6, 133.8, 133.4, 132.5, 132.3, 132.0, 131.7, 131.7, 130.5, 130.4, 130.1, 129.9, 129.9, 129.4, 129.2, 129.1, 129.1, 128.9, 128.7, 128.6, 128.0, 127.6, 127.2, 126.0, 124.8, 120.3, 116.3. **FT-IR:**  $\nu = 1700, 1641, 1557, 1420, 1374, 1226, 1089, 958, 755, 689, 553 \text{ cm}^{-1}$ . **HRMS (ESI)** calcd for  $\text{C}_{39}\text{H}_{25}\text{Cl}_2\text{N}_2\text{O}_5$  requires  $(\text{M} + \text{H})^+$  671.1141; found: 671.1145.

**(2-amino-5-chlorophenyl) (phenyl)methanol (1a)**. Colourless solid (96% yield);  **$^1\text{H}$  NMR (400**

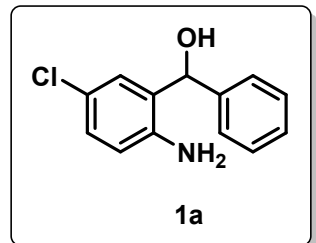

**MHz,  $\text{CDCl}_3$ )  $\delta$  7.43 – 7.34 (m, 5H), 7.13 – 7.04 (m, 2H), 6.59 (d,  $J = 8.4 \text{ Hz}$ , 1H), 5.76 (d,  $J = 3.1 \text{ Hz}$ , 1H), 3.95 (s, 2H), 2.91 (d,  $J = 3.5 \text{ Hz}$ , 1H).  $^{13}\text{C}$  NMR (101 MHz,  $\text{CDCl}_3$ )  $\delta$  143.2, 141.1, 129.0, 128.7, 128.6, 128.2, 128.0, 126.6, 123.1, 118.1, 74.3.**

## 4. Mechanistic Investigations

### 4.1 Control experiment study

As illustrated in Scheme S1, a model reaction was performed using the starting materials **1a**, **2a**, **3a** and **4c**. The formation of the intermediates **A**, **7**, and **B** was successfully isolated and characterized by  $^1\text{H}$  and  $^{13}\text{C}$  NMR analysis and the spectra are given below.

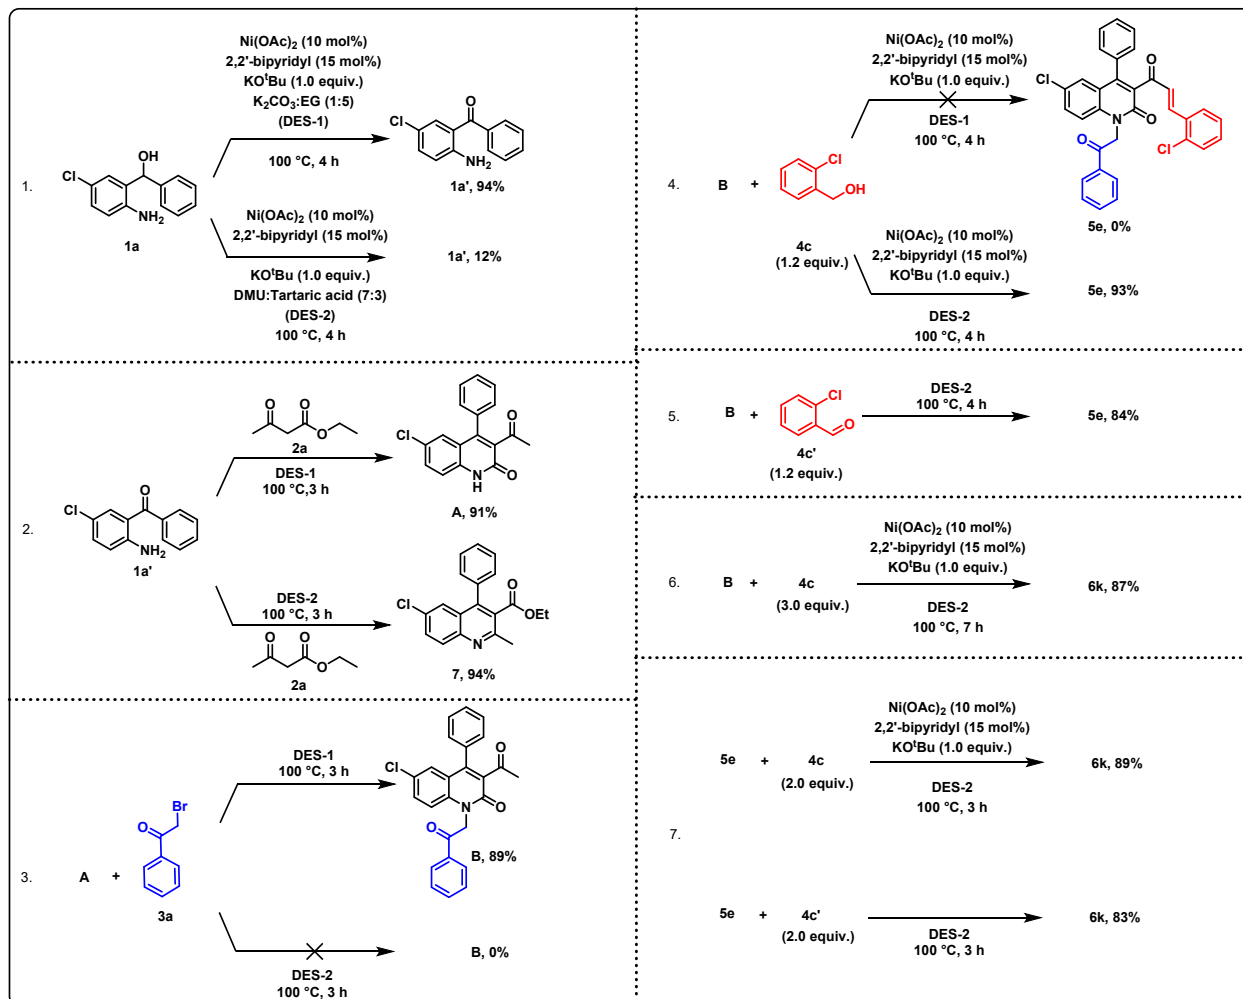

Scheme S1. Control experiment study

**3-Acetyl-6-chloro-4-phenylquinolin-2(1H)-one (A).** Colourless solid (93% yield); <sup>1</sup>H NMR

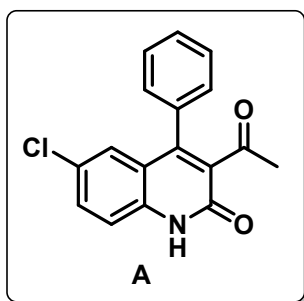

(400 MHz, CDCl<sub>3</sub>) δ 13.20 (s, 1H), 7.52 (dd, *J* = 4.8, 1.5 Hz, 3H), 7.47 (dd, *J* = 13.0, 5.4 Hz, 2H), 7.32 (dd, *J* = 6.5, 2.9 Hz, 2H), 7.24 (d, *J* = 2.0 Hz, 1H), 2.29 (s, 3H). <sup>13</sup>C NMR (101 MHz, CDCl<sub>3</sub>) δ 201.5, 161.5, 148.0, 136.7, 133.7, 133.5, 131.8, 129.4, 129.0, 128.9, 128.6, 126.7, 120.9, 118.2, 31.7.

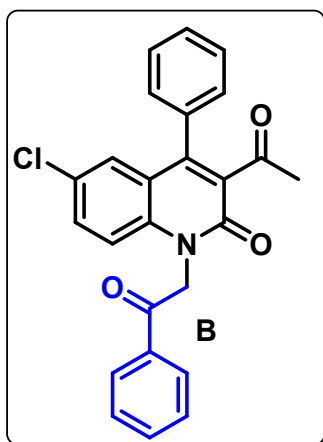

**3-Acetyl-6-chloro-1-(2-oxo-2-phenylethyl)-4-phenylquinolin-2(1H)-one (B).** Colourless solid (93% yield); <sup>1</sup>H NMR (400 MHz, CDCl<sub>3</sub>) δ 8.13 – 8.09 (m, 2H), 7.69 (t, *J* = 7.4 Hz, 1H), 7.57 (t, *J* = 7.7 Hz, 2H), 7.51 (dd, *J* = 5.0, 1.8 Hz, 3H), 7.43 (dd, *J* = 9.0, 2.4 Hz, 1H), 7.33 (dd, *J* = 6.4, 3.1 Hz, 2H), 7.27 – 7.26 (m, 1H), 6.98 (d, *J* =

9.0 Hz, 1H), 5.85 (s, 2H), 2.23 (s, 3H).  $^{13}\text{C}$  NMR (101 MHz,  $\text{CDCl}_3$ )  $\delta$  201.0, 191.9, 159.1, 146.3, 137.8, 134.6, 134.4, 133.6, 133.4, 131.5, 129.3, 129.1, 129.1, 128.8, 128.3, 128.2, 128.1, 122.0, 115.8, 48.9, 31.4.

**Ethyl 6-chloro-2-methyl-4-phenylquinoline-3-carboxylate (7).**

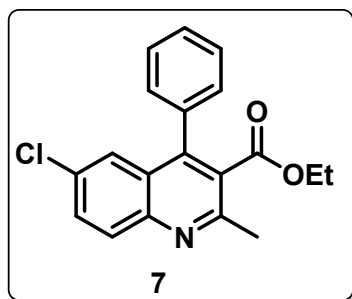

7.48 (m, 3H), 7.37 – 7.32 (s, 3H), 0.95 (t,  $J = 7.1$   $\text{CDCl}_3$ )  $\delta$  168.1, 155.0, 146.1, 145.4, 135.0, 132.4, 131.2, 130.5, 129.3, 128.8, 128.5, 128.2, 126.0, 125.2, 61.5, 23.7, 13.6.

Colourless solid (93% yield);  $^1\text{H}$  NMR (400 MHz,  $\text{CDCl}_3$ )  $\delta$  8.01 (d,  $J = 8.9$  Hz, 1H), 7.65 (dd,  $J = 8.9, 0.9$  Hz, 1H), 7.55 – 7.53 (m, 1H), 7.52 – (m, 2H), 4.07 (q,  $J = 7.1$  Hz, 2H), 2.77 Hz, 3H).  $^{13}\text{C}$  NMR (101 MHz,

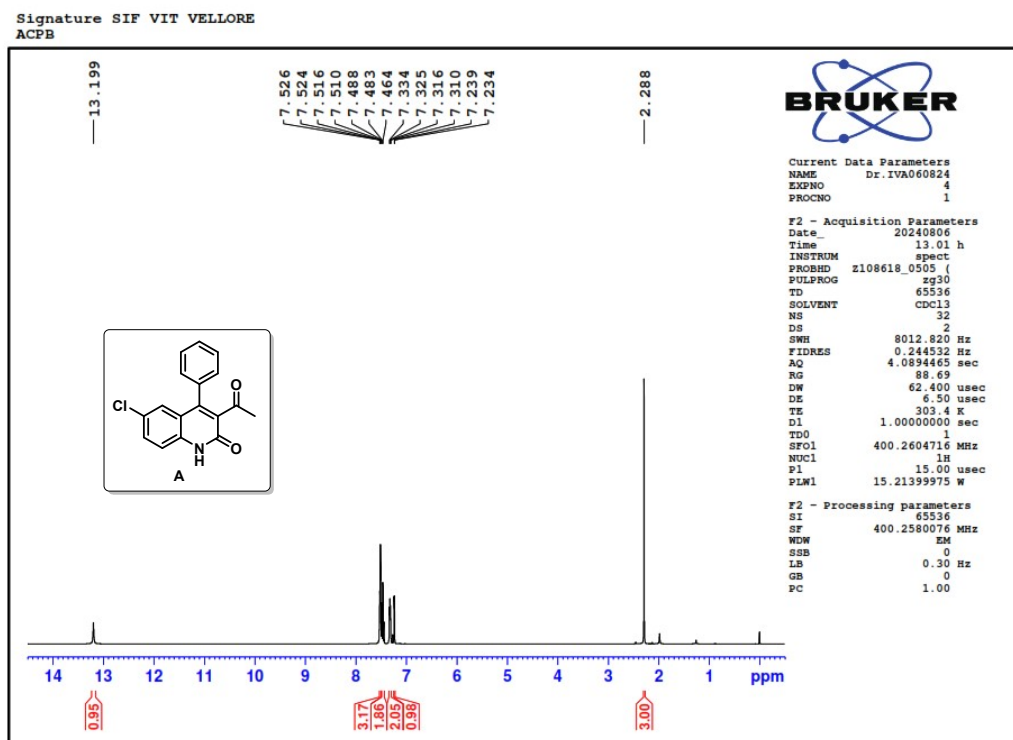

Fig. S1.  $^1\text{H}$  NMR spectrum of A ( $\text{CDCl}_3$ , 400 MHz)

Signature SIF VIT VELLORE  
INI

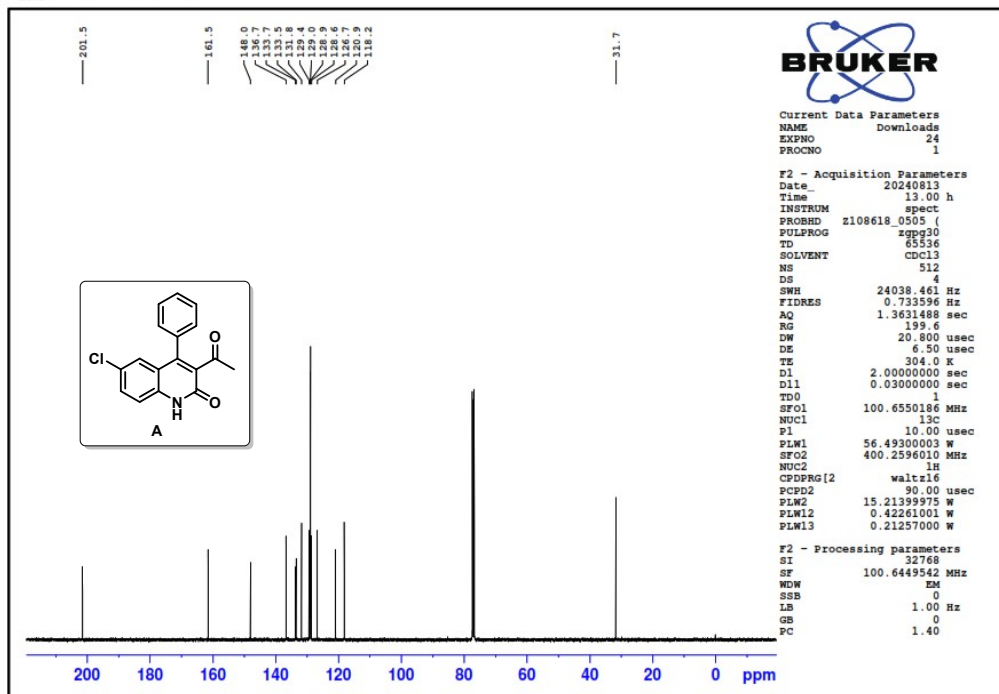

Fig. S2. <sup>13</sup>C NMR spectrum of A (CDCl<sub>3</sub>, 101 MHz)

Signature SIF VIT VELLORE  
ACPB

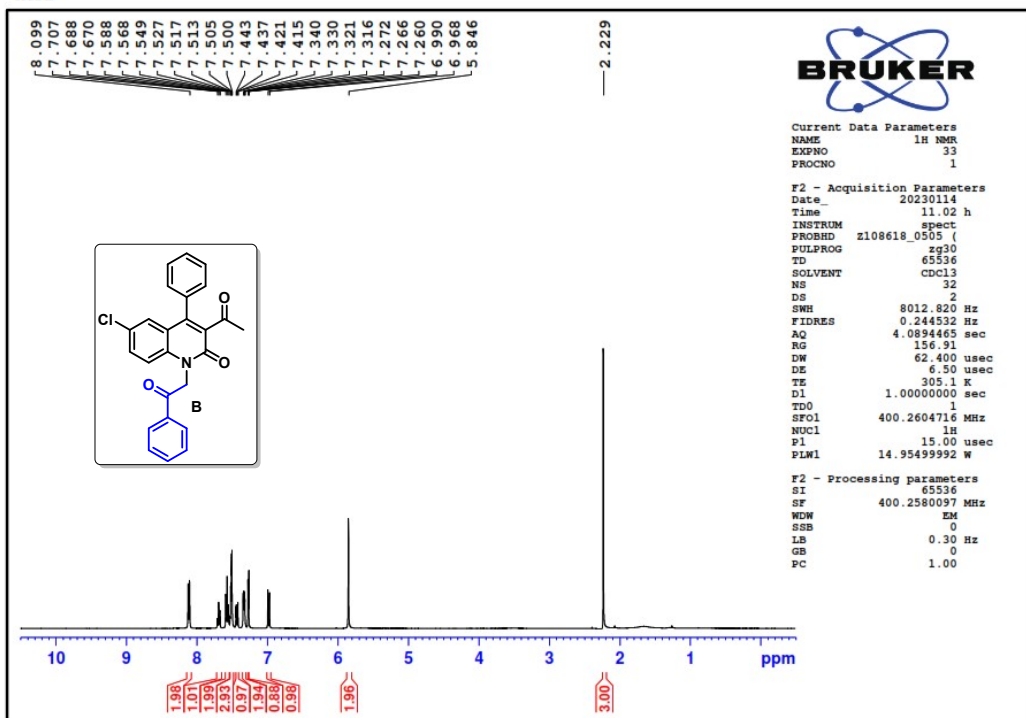

Fig. S3. <sup>1</sup>H NMR spectrum of B (CDCl<sub>3</sub>, 400 MHz)

Signature SIF VIT VELLORE  
ACPB

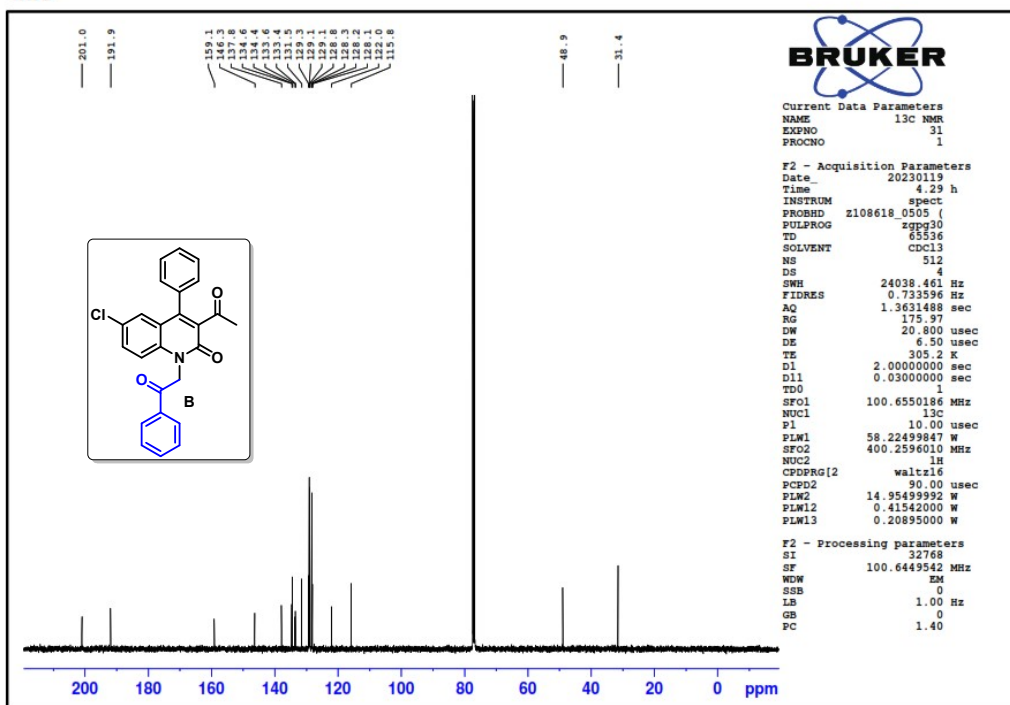

Fig S4. <sup>13</sup>C NMR spectrum of **B** (CDCl<sub>3</sub>, 101 MHz)

Signature SIF VIT VELLORE  
ES

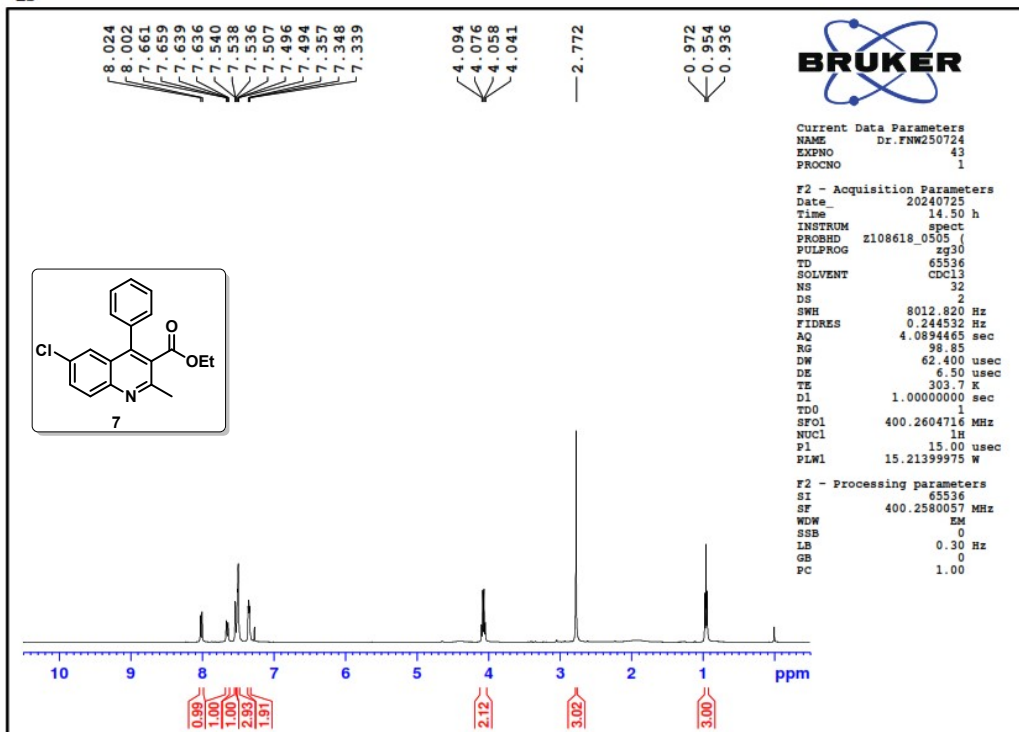

Fig. S5. <sup>1</sup>H NMR spectrum of **7** (CDCl<sub>3</sub>, 400 MHz)

Signature SIF VIT VELLORE  
ES

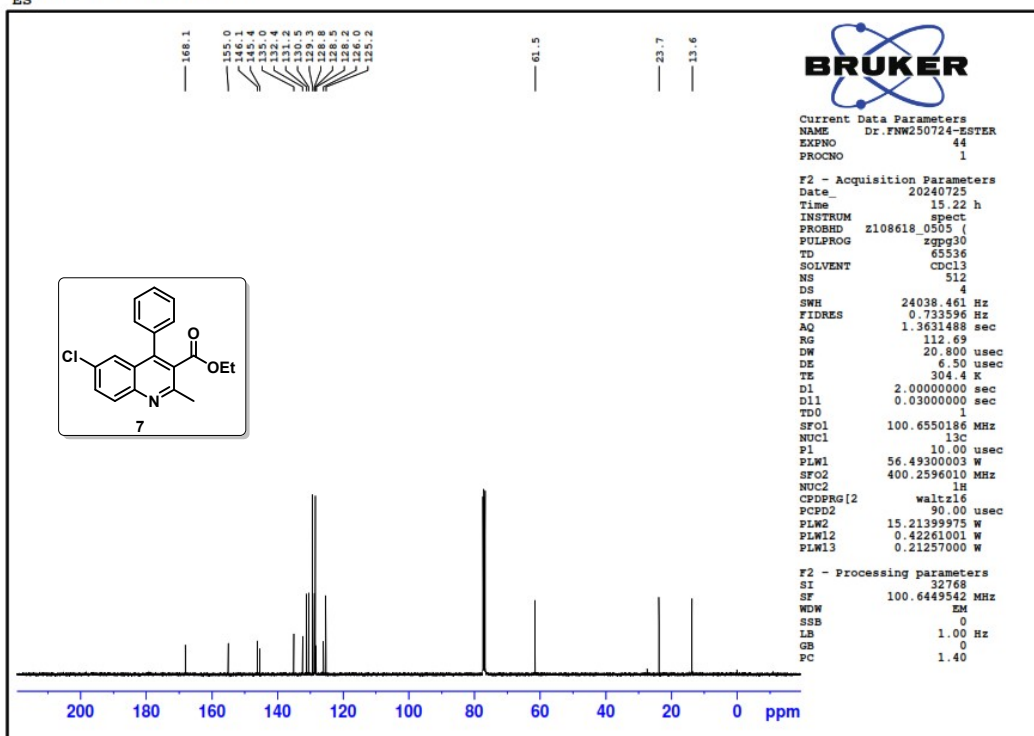

Fig. S6.  $^{13}\text{C}$  NMR spectrum of 7 ( $\text{CDCl}_3$ , 101 MHz)

## 4.2 Mass spectroscopic Studies for the intermediate detection

### 4.2.1 Stoichiometric studies

A mixture of  $\text{Ni}(\text{OAc})_2 \cdot 4\text{H}_2\text{O}$  (1.0 mmol), 2,2'-bipyridyl (1.5 mmol),  $\text{KO}^t\text{Bu}$  (1.0 equiv.) and  $\text{K}_2\text{CO}_3$ :Ethylene glycol (1:5) DES-1 were heated at 100 °C for 10 min. The reaction mixture was analyzed by HRMS (ESI) spectroscopy. The calculated mass for  $\text{C}_{14}\text{H}_{14}\text{KN}_2\text{NiO}_4$  ( $\text{M} + \text{K}$ ) $^+$  is 370.9944; found: 370.9945. Based on the HRMS result, we concluded that a nickel complex forms during the catalytic cycle. The HRMS spectrum of complex  $[\text{Ni}(\text{II})\text{L}_n]$  is shown in Fig.S7

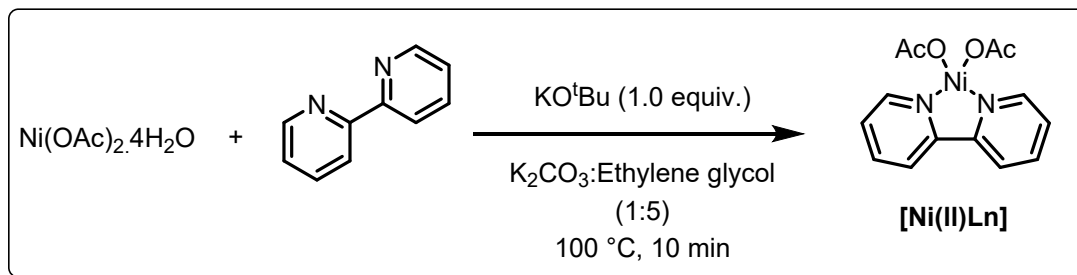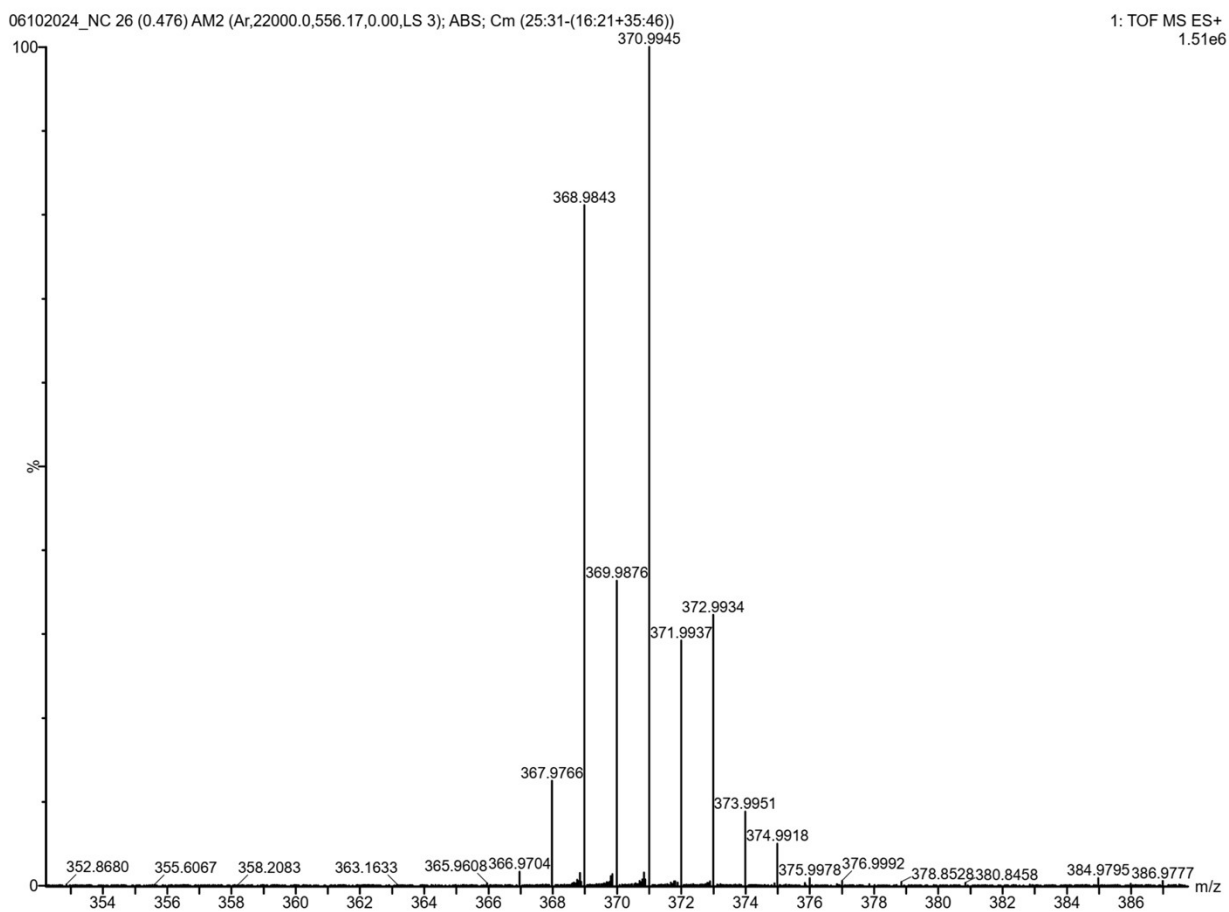

Fig. S7. HRMS spectrum of [Ni(II)L<sub>n</sub>]

#### 4.2.2 Nickel enolate intermediate identification study



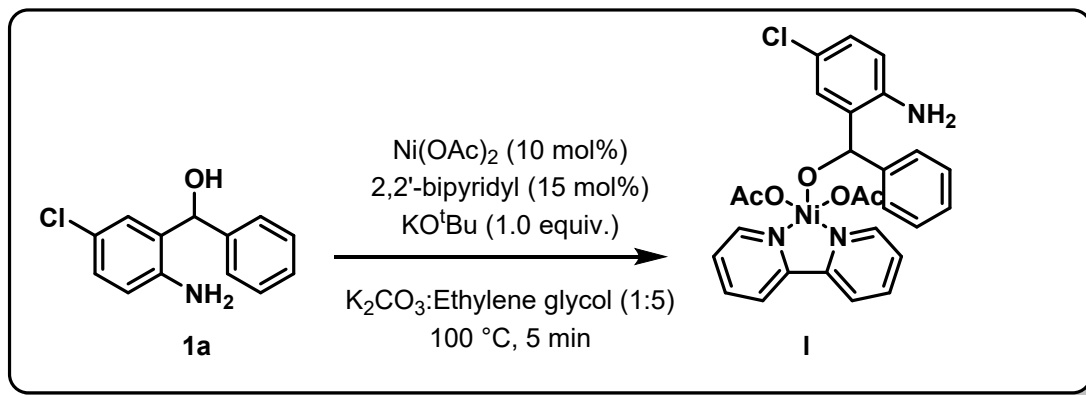

A mixture of 2-amino benzhydrol (0.5 mmol),  $\text{Ni(OAc)}_2 \cdot 4\text{H}_2\text{O}$  (10 mol%), 2,2'-bipyridyl (15 mol%),  $\text{KO}^t\text{Bu}$  (1.0 equiv.) and  $\text{K}_2\text{CO}_3$ :Ethylene glycol (1:5) DES-1 were heated at  $100\text{ }^\circ\text{C}$  for 5 min. The reaction mixture was analyzed by HRMS (ESI) spectroscopy. The calculated mass for  $\text{C}_{27}\text{H}_{26}\text{ClN}_3\text{NiO}_5$  ( $\text{M} + \text{H}$ )<sup>+</sup> is 565.0914; found: 565.0915.

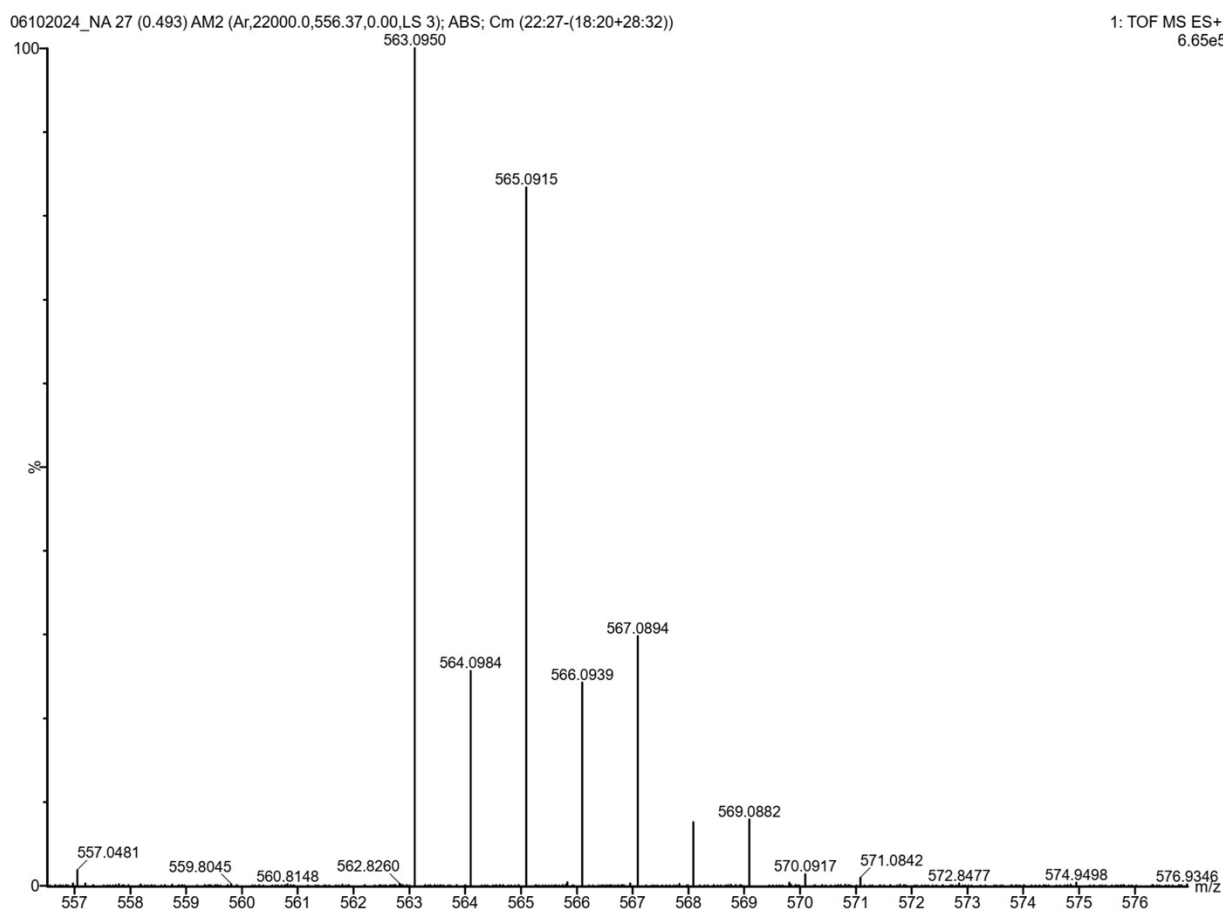

Fig. S8. HRMS spectrum of intermediate I

Based on the HRMS result, the reaction proceeds *via* metal alkoxide formation followed by a  $\beta$ -hydride elimination mechanism. The HRMS spectrum of intermediate I is shown in Fig. S8.

### 4.3 Reaction monitoring by $^1\text{H}$ NMR analysis for the synthesis of 5e & 6l

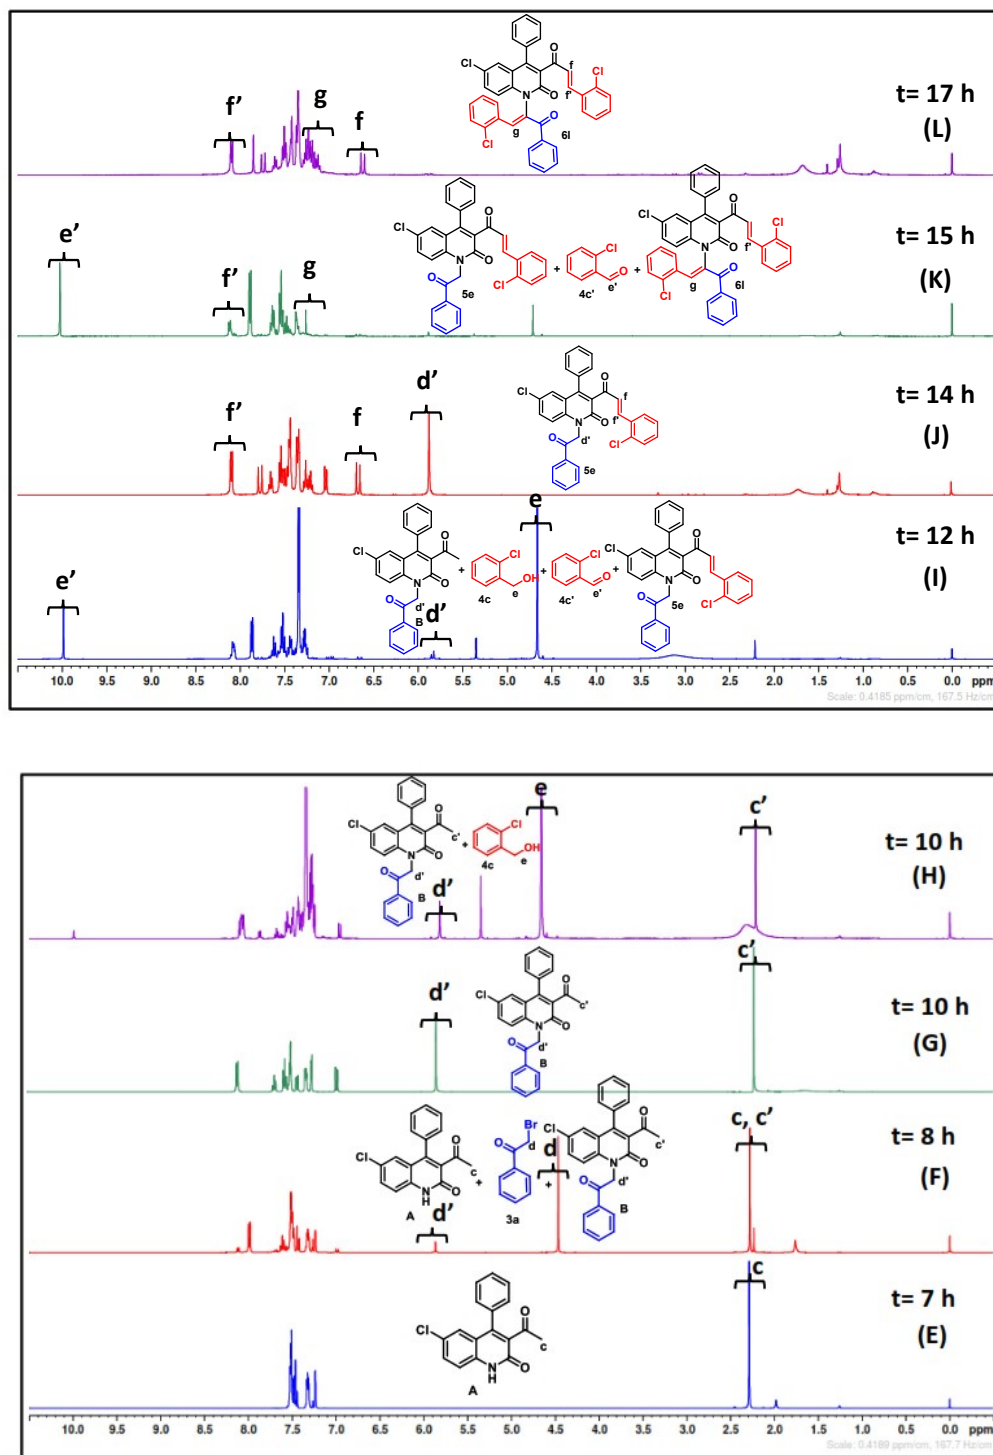

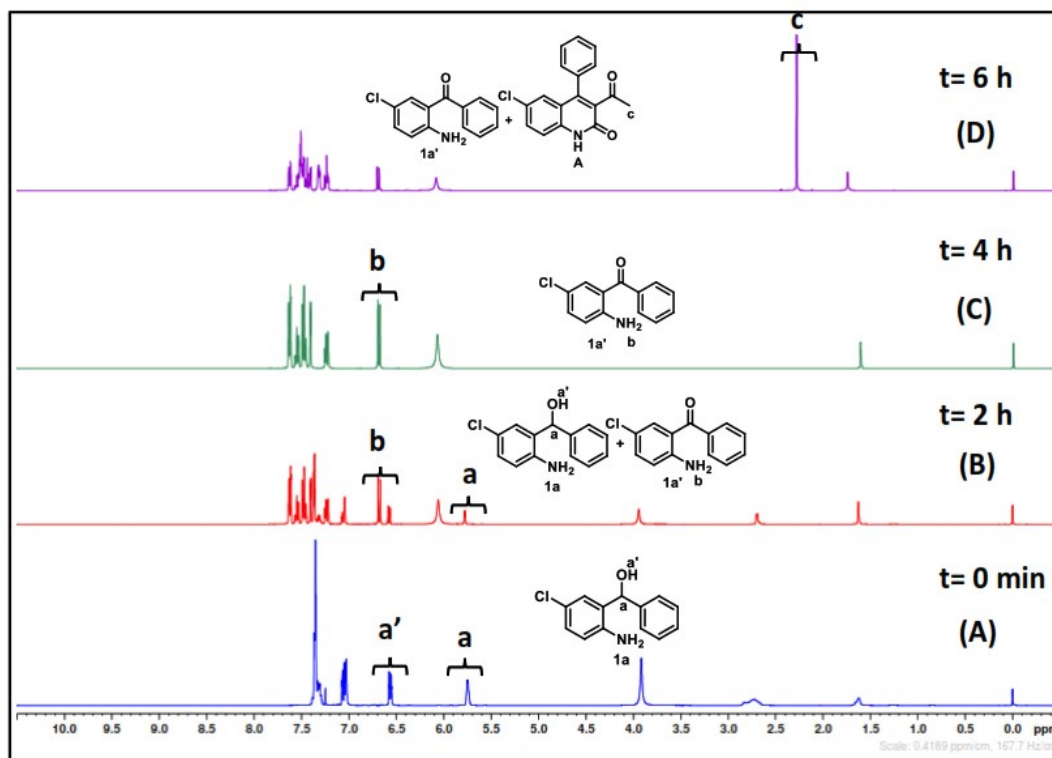

Fig. S9. Reaction monitoring by  $^1\text{H}$  NMR analysis in different time intervals for the synthesis of **5e** & **6l**

The  $^1\text{H}$  NMR studies were performed to propose the plausible reaction mechanism involved in the sequential synthesis of compounds **5e** and **6l**. Initially, the  $^1\text{H}$  NMR spectrum of **A** was taken for the benzhydrol **1a**, before initiation of the reaction, showing the signal for its benzylic and alcoholic -OH protons at 5.8 ppm and 6.5 ppm respectively. Spectrum **B** was recorded after 2 h, indicating the formation of the benzophenone intermediate **1a'** along with benzhydrol **1a**, as shown by the appearance of  $\text{NH}_2$  protons at 6.8 ppm. The Spectrum **C**, recorded after 4 h, demonstrated the exclusive formation of the benzophenone intermediate **1a'**, confirmed by the disappearance of the benzylic proton signal at 5.8 ppm. Spectrum **D** and Spectrum **E** were recorded at 6-hour and 7-hour intervals, respectively, indicating the formation of intermediate **A**, as shown by the presence of aliphatic  $\text{CH}_3$  peaks in the range of 2.3-2.4 ppm. Spectrum **F** was recorded after the addition of phenacyl bromide **3a** to the reaction mixture, indicating the presence of benzylic  $\text{CH}_2$  at 4.5 ppm. The spectrum **G** was recorded after 10 h, showing the formation of intermediate **B** which is confirmed by its methyl and benzylic protons appearing in 2.4 and 6.0 ppm respectively. Spectrum **H** was recorded after the addition of 2-chloro benzyl

alcohol **4c** into the reaction mixture, represented by the alcohol benzylic CH<sub>2</sub> appearing at 4.6 ppm. The spectrum **I** was recorded after 12 h, indicating the formation of aldehyde **4c'**, as evidenced by the appearance of -CHO proton at 10 ppm along with the formation of mono-alkenylated quinolinone **5e**. Spectrum **J** was recorded over a period of 14 h, showing that the reaction was completed with the formation of mono-alkenylated quinolinone **5e** which was confirmed by the disappearance of intermediate **B** aliphatic methyl protons in 2.4 ppm and the appearance of **5e** olefinic protons at 6.7 and 8.1 ppm. Similarly, by adding an excess of alcohol (3.0 mmol) **4c** and continuing the reaction for 17 h, the formation of the bi-alkenylated quinolinone **6l** was observed (Spectrum K and L). This was confirmed by the disappearance of the mono-alkenylated quinolinone **5e** benzylic CH<sub>2</sub> and the appearance of **6l** methine proton at 7.2 ppm. All spectra (**Fig. S9**) were recorded by conducting the reactions according to the standard reaction procedure.

## 5. X-Ray Crystallography Data

Crystallographic data and structure determination details are compiled in Table S1. The crystals were obtained by slow evaporation of compounds **B** (CCDC: 2374871) and **6m** (CCDC: 2388694) in a solution consisting of CDCl<sub>3</sub> and DCM at r.t. The structure was determined using direct methods employed in ShelXT,<sup>1</sup> OleX<sup>2</sup> and refinement was carried out using least-square minimization implemented in ShelXL.<sup>3</sup> All nonhydrogen atoms were refined with anisotropic displacement parameters. Hydrogen atom positions were fixed geometrically in idealized positions and were refined using a riding model.

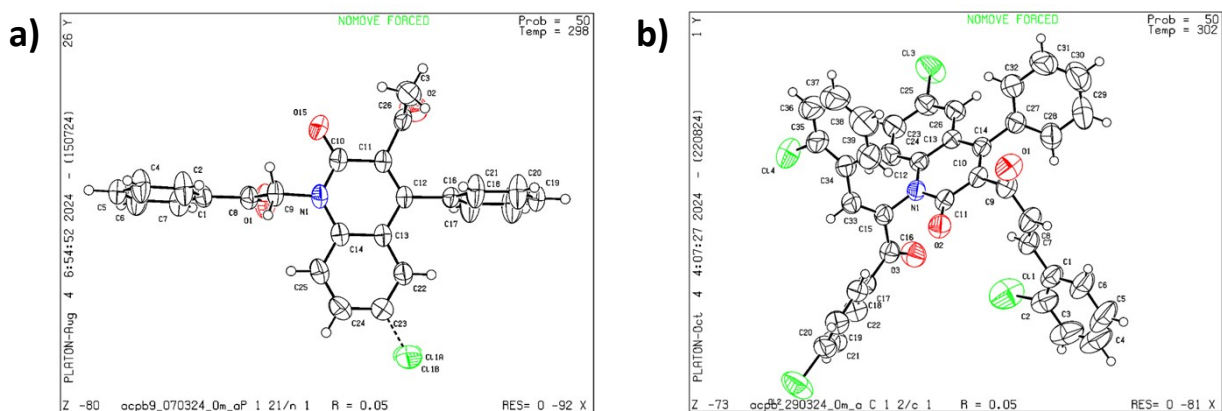

Fig 10. a) Eclipsed diagram of the compound **B**. b) Eclipsed diagram of the compound **6m**

**Table S1** Crystal data and structure refinement for compounds **B** (CCDC: 2374871) and **6m** (CCDC: 2388694)

| Compound number                             | <b>B</b>                                                      | <b>6m</b>                                                            |
|---------------------------------------------|---------------------------------------------------------------|----------------------------------------------------------------------|
| Empirical formula                           | C <sub>25</sub> H <sub>18</sub> ClNO <sub>3</sub>             | C <sub>39</sub> H <sub>25.5</sub> Cl <sub>4</sub> NO <sub>4.25</sub> |
| Formula weight                              | 415.85                                                        | 717.90                                                               |
| Temperature/K                               | 298.00                                                        | 302.00                                                               |
| Crystal system                              | monoclinic                                                    | monoclinic                                                           |
| Space group                                 | P2 <sub>1</sub> /n                                            | C2/c                                                                 |
| a/Å                                         | 16.624(2)                                                     | 31.3651(17)                                                          |
| b/Å                                         | 5.2910(8)                                                     | 11.6284(6)                                                           |
| c/Å                                         | 23.770(3)                                                     | 20.2570(11)                                                          |
| α/°                                         | 90                                                            | 90                                                                   |
| β/°                                         | 102.602(5)                                                    | 97.297(2)                                                            |
| γ/°                                         | 90                                                            | 90                                                                   |
| Volume/Å <sup>3</sup>                       | 2040.4(5)                                                     | 7328.4(7)                                                            |
| Z                                           | 4                                                             | 8                                                                    |
| ρ <sub>calc</sub> /cm <sup>3</sup>          | 1.354                                                         | 1.301                                                                |
| μ/mm <sup>-1</sup>                          | 0.214                                                         | 0.364                                                                |
| F(000)                                      | 864.0                                                         | 2948.0                                                               |
| Crystal size/mm <sup>3</sup>                | 0.173 × 0.168 × 0.144                                         | 0.241 × 0.179 × 0.149                                                |
| Radiation                                   | MoKα (λ = 0.71073)                                            | MoKα (λ = 0.71073)                                                   |
| 2Θ range for data collection/°              | 3.362 to 56.562                                               | 4.054 to 56.61                                                       |
| Index ranges                                | -21 ≤ h ≤ 22, -6 ≤ k ≤ 7, -31 ≤ l ≤ 31                        | -31 ≤ h ≤ 41, -15 ≤ k ≤ 15, -27 ≤ l ≤ 27                             |
| Reflections collected                       | 28713                                                         | 71644                                                                |
| Independent reflections                     | 5037 [R <sub>int</sub> = 0.0512, R <sub>sigma</sub> = 0.0431] | 9085 [R <sub>int</sub> = 0.0547, R <sub>sigma</sub> = 0.0393]        |
| Data/restraints/parameters                  | 5037/0/282                                                    | 9085/0/448                                                           |
| Goodness-of-fit on F <sup>2</sup>           | 1.033                                                         | 1.013                                                                |
| Final R indexes [I ≥ 2σ (I)]                | R <sub>1</sub> = 0.0540, wR <sub>2</sub> = 0.1314             | R <sub>1</sub> = 0.0541, wR <sub>2</sub> = 0.1272                    |
| Final R indexes [all data]                  | R <sub>1</sub> = 0.1107, wR <sub>2</sub> = 0.1742             | R <sub>1</sub> = 0.1141, wR <sub>2</sub> = 0.1662                    |
| Largest diff. peak/hole / e Å <sup>-3</sup> | 0.21/-0.21                                                    | 0.30/-0.41                                                           |

## 6. Copies of NMR ( $^1\text{H}$ & $^{13}\text{C}$ ), FT-IR and HRMS Spectra

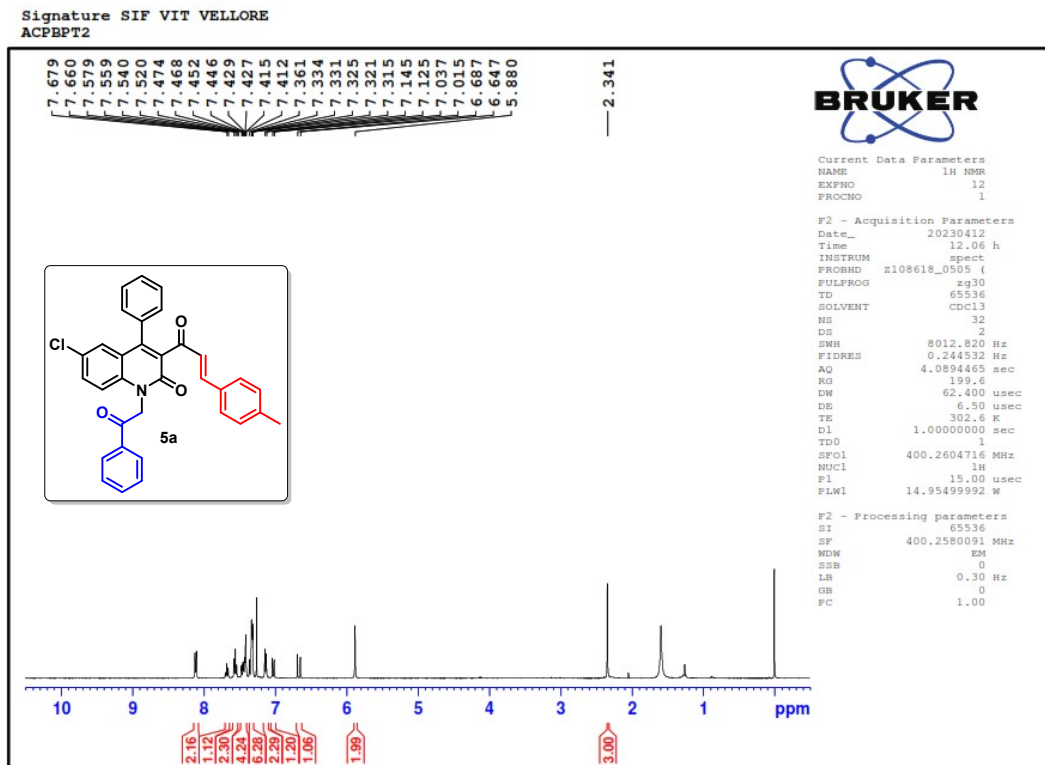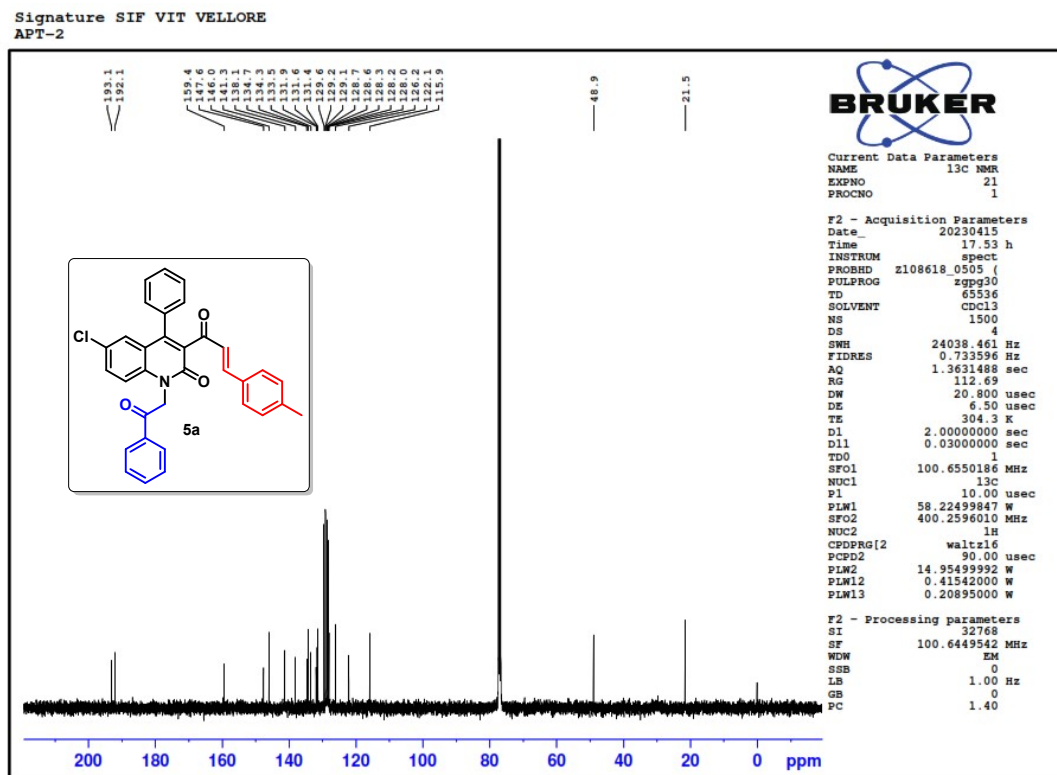

$^1\text{H}$  and  $^{13}\text{C}$  NMR spectra of compound **5a** in  $\text{CDCl}_3$

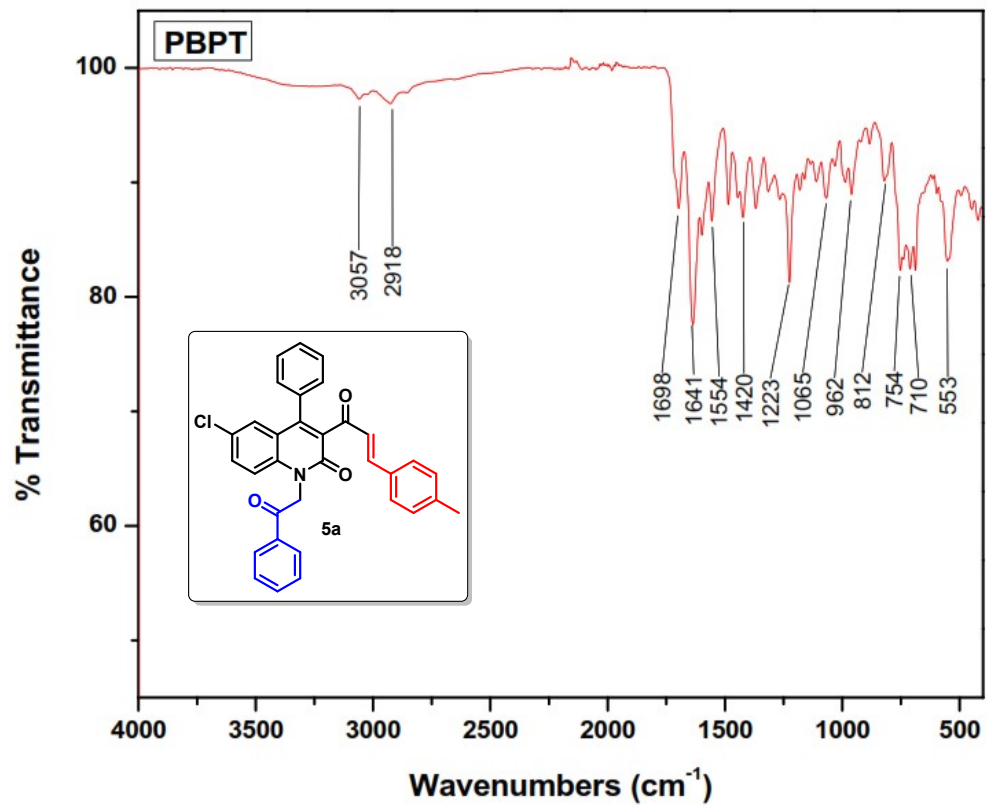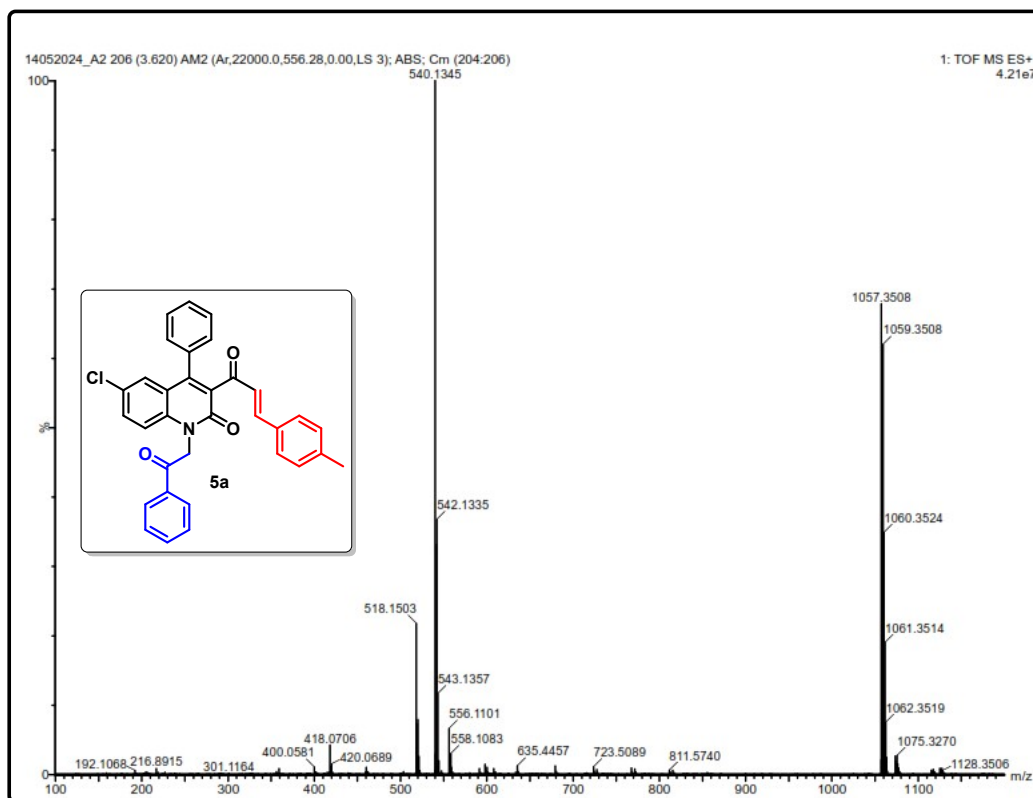

IR and HRMS spectra of compound **5a**

Signature SIF VIT VELLORE  
ACPB2ME

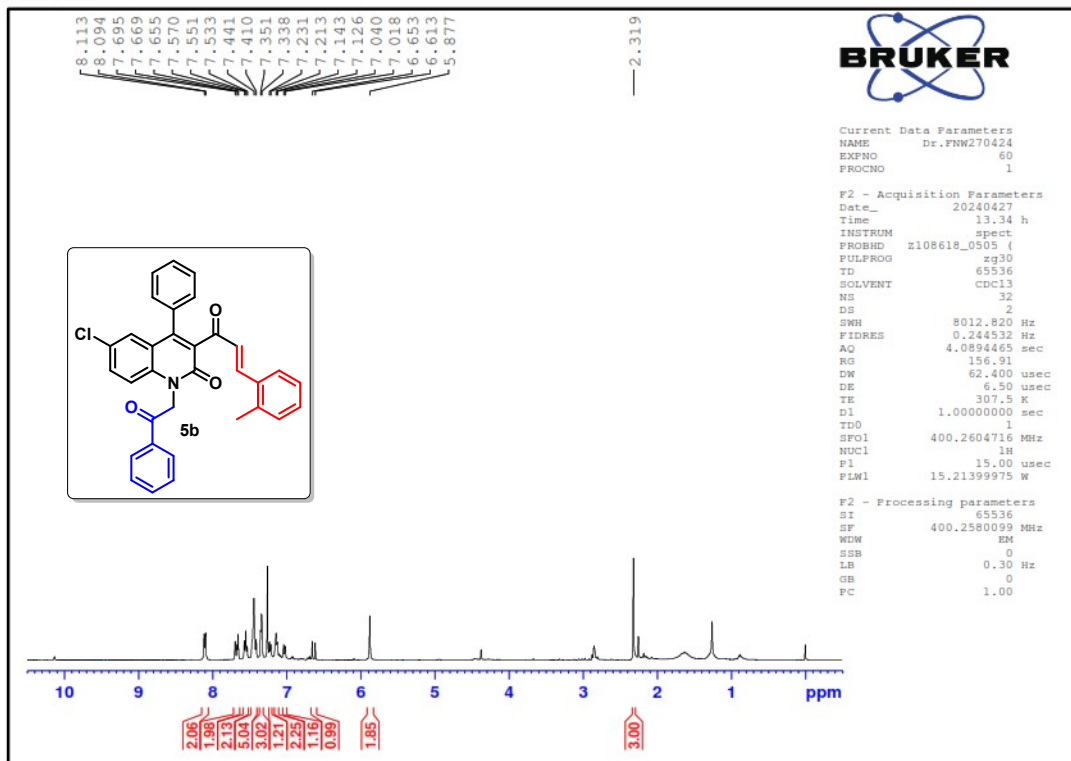

Signature SIF VIT VELLORE  
PB2ME

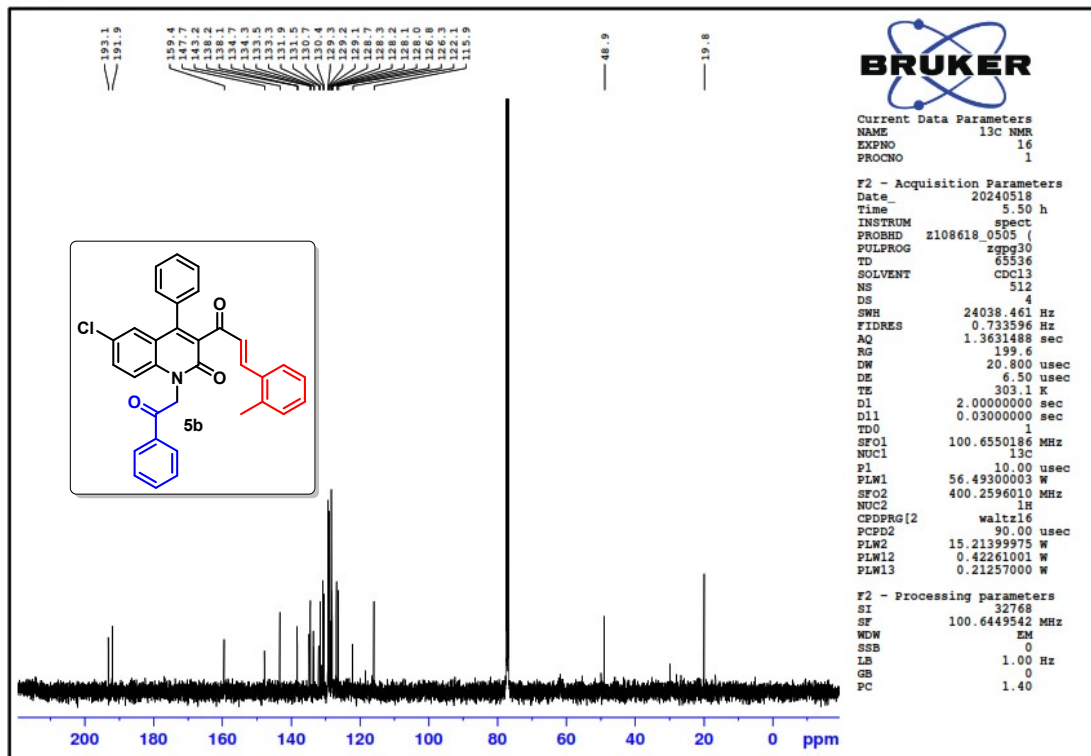

<sup>1</sup>H and <sup>13</sup>C NMR spectra of compound **5b** in CDCl<sub>3</sub>



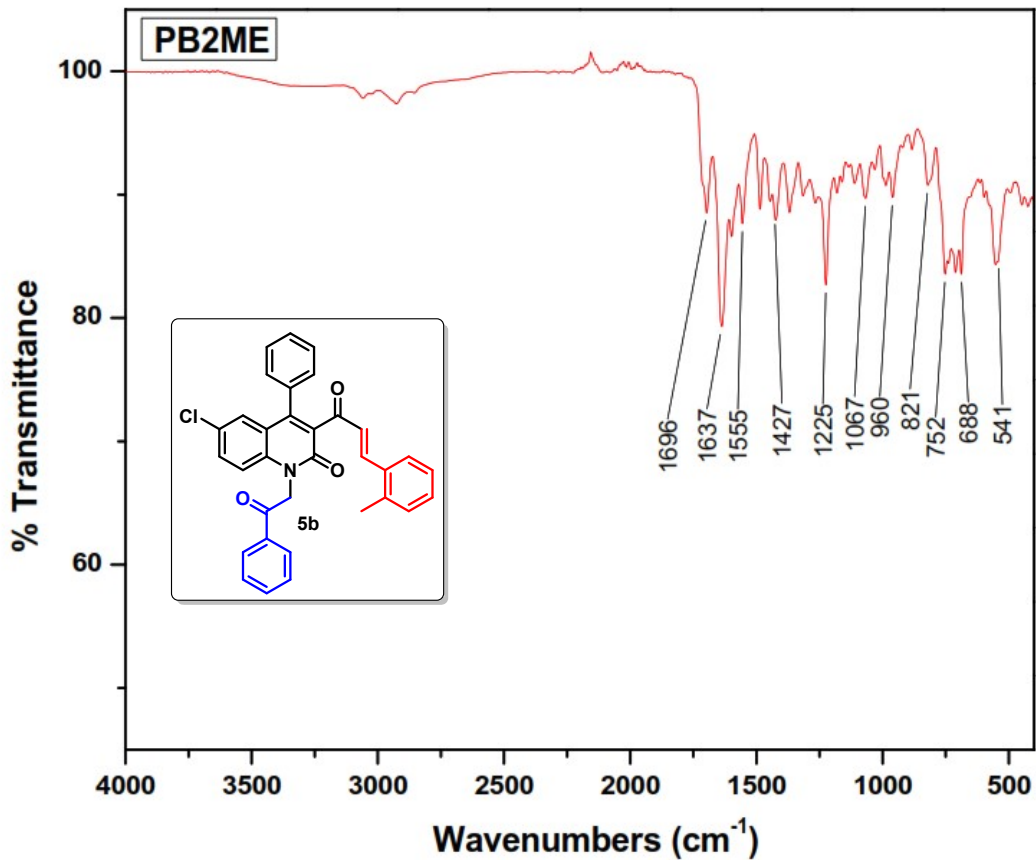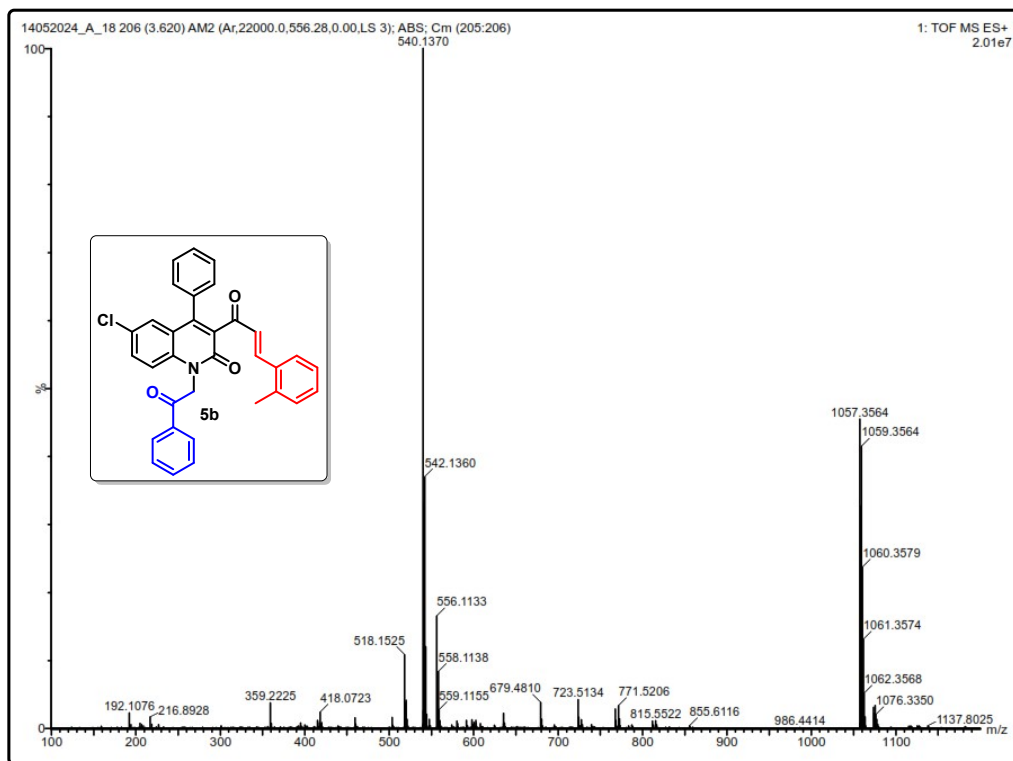

IR and HRMS spectra of compound **5b**

Signature SIF VIT VELLORE  
PB340ME

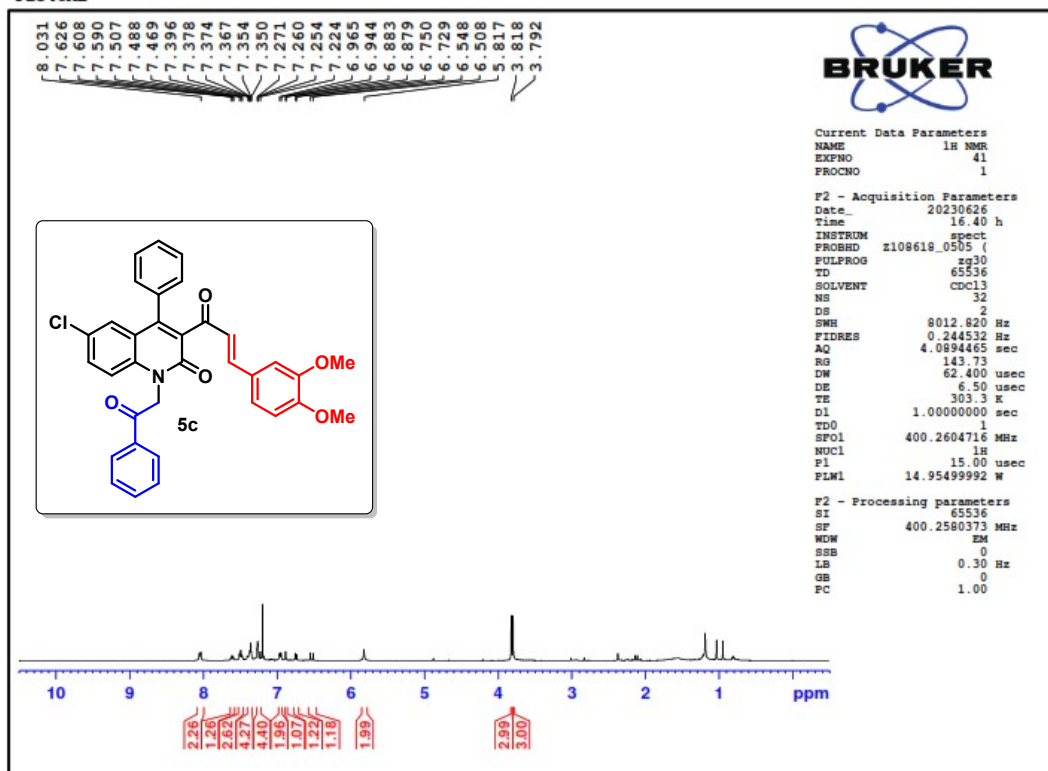

Signature SIF VIT VELLORE  
PB340ME

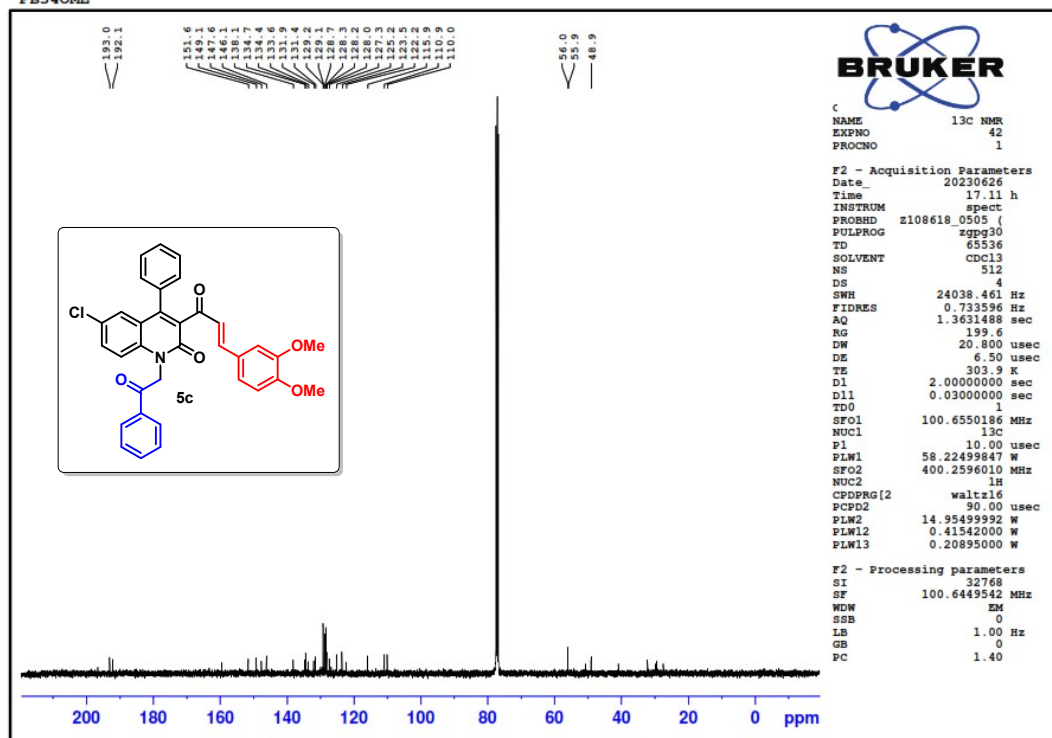

<sup>1</sup>H and <sup>13</sup>C NMR spectra of compound **5c** in CDCl<sub>3</sub>

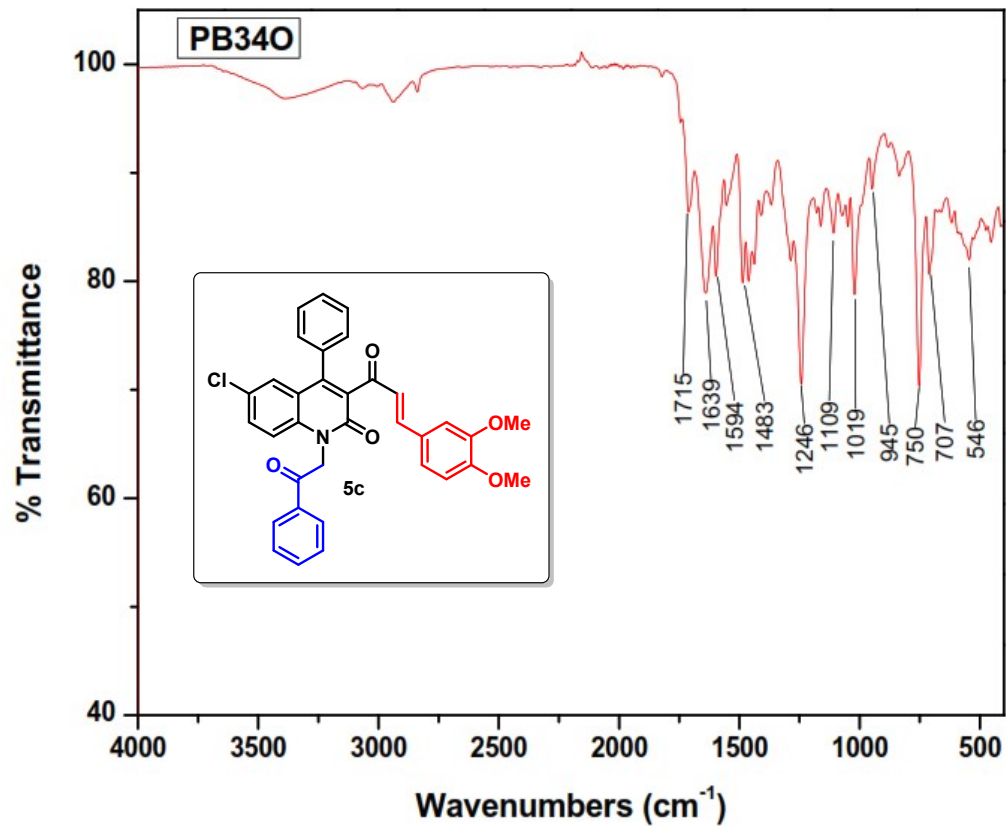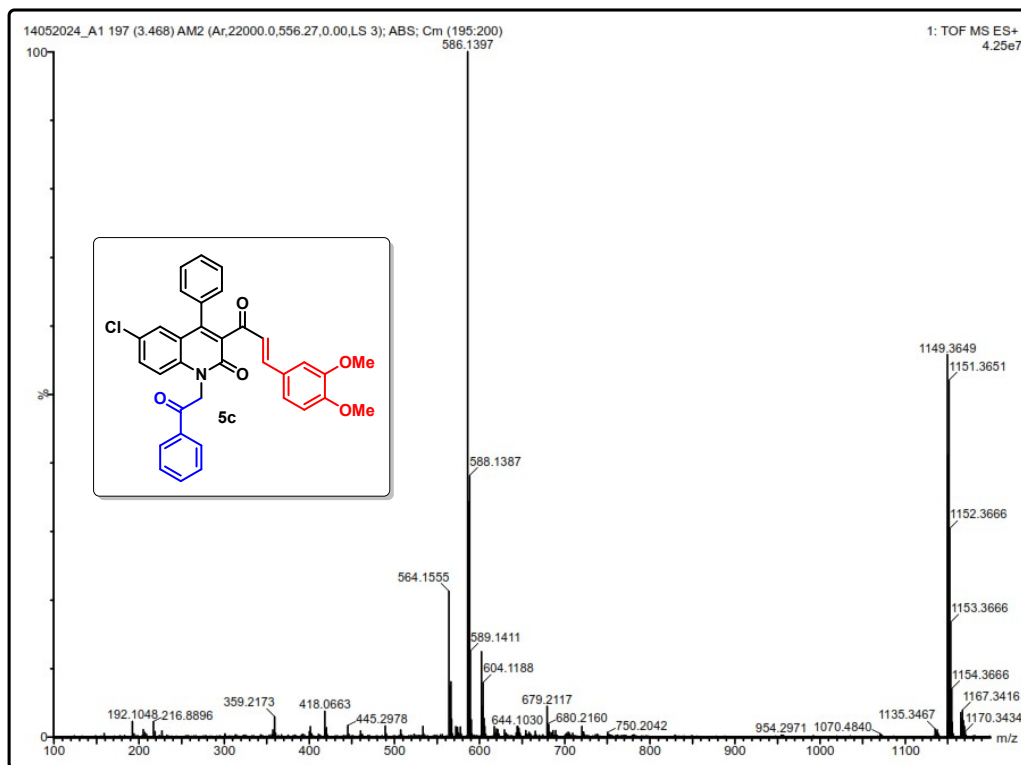

IR and HRMS spectra of compound **5c**

Signature SIF VIT VELLORE  
ACPB4CL

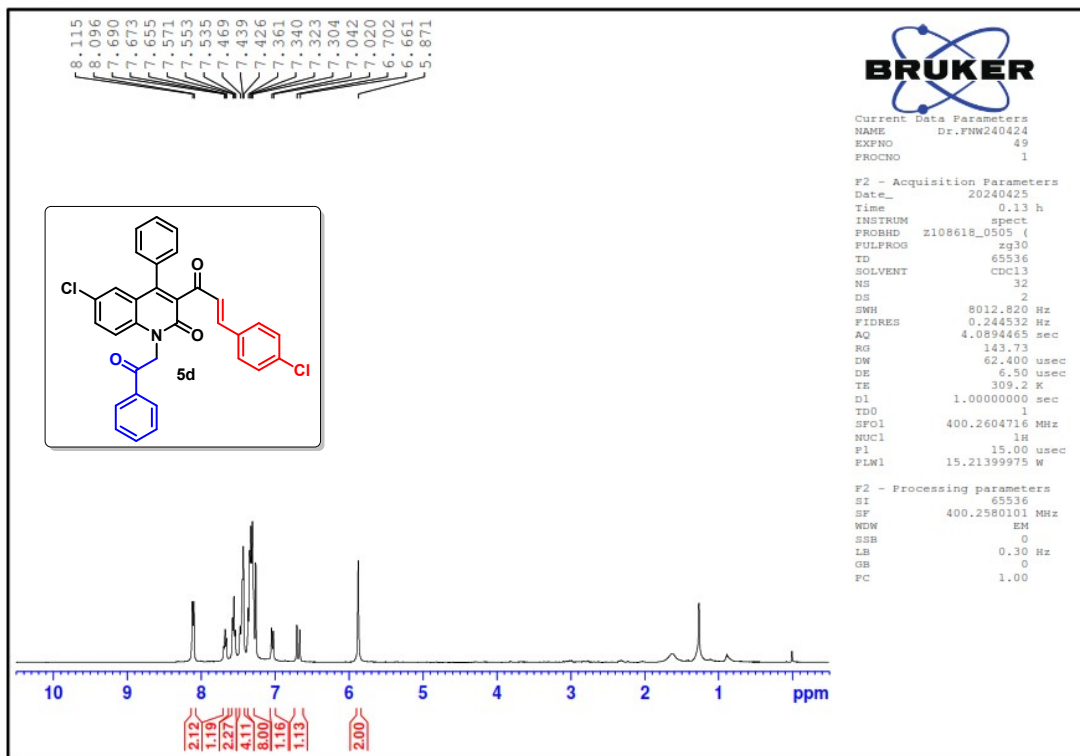

Signature SIF VIT VELLORE  
AC4CL

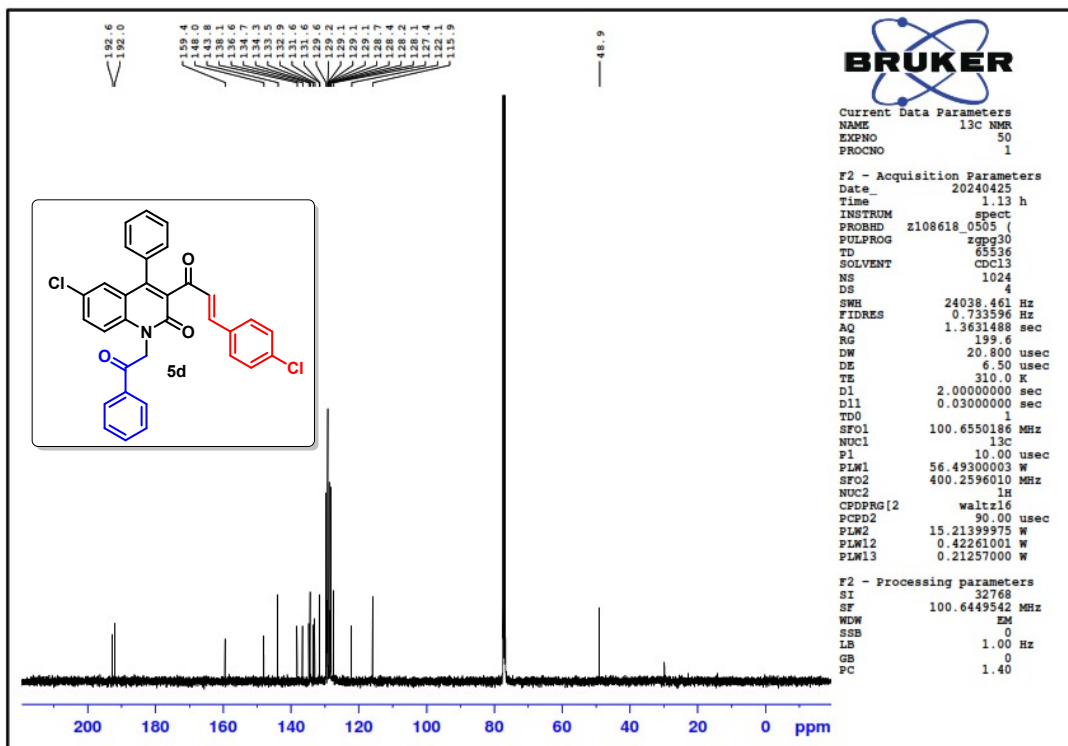

<sup>1</sup>H and <sup>13</sup>C NMR spectra of compound 5d in CDCl<sub>3</sub>

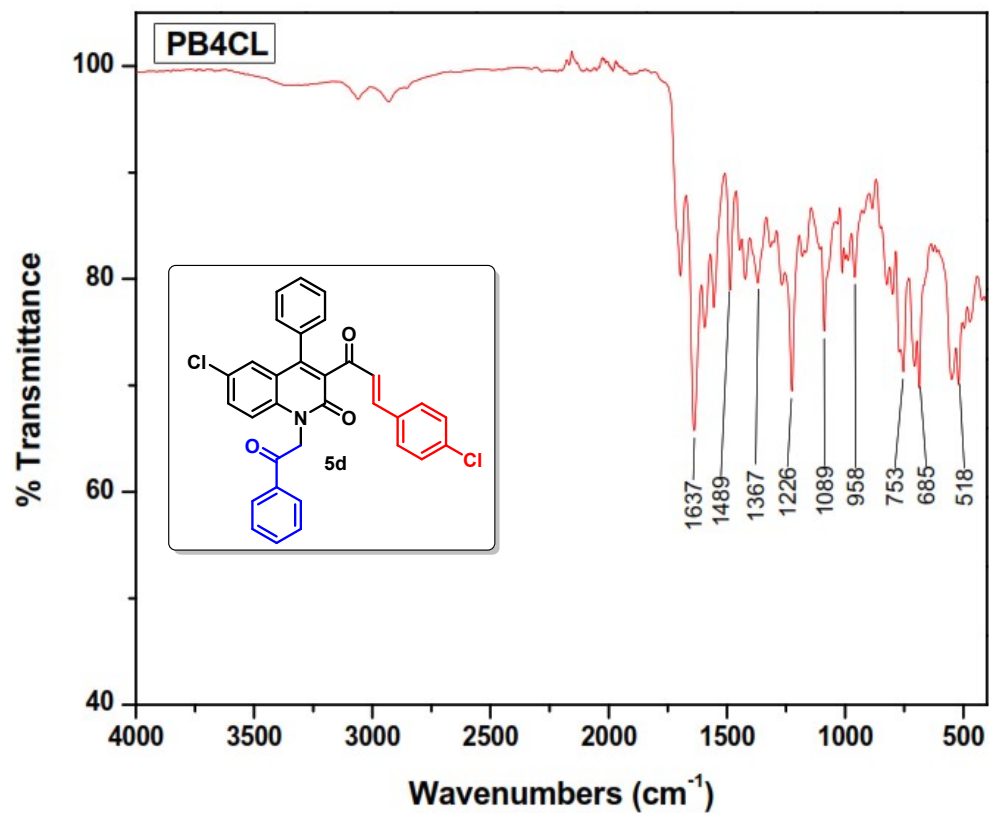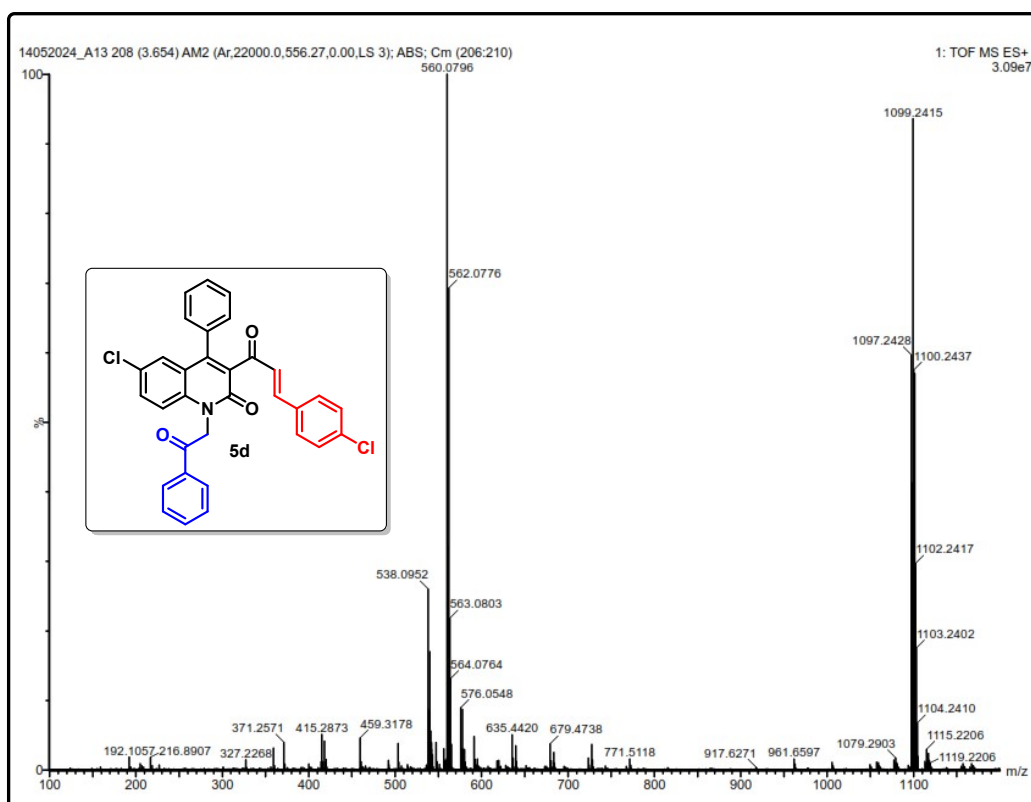

IR and HRMS spectra of compound **5d**

Signature SIF VIT VELLORE  
PB2CL2

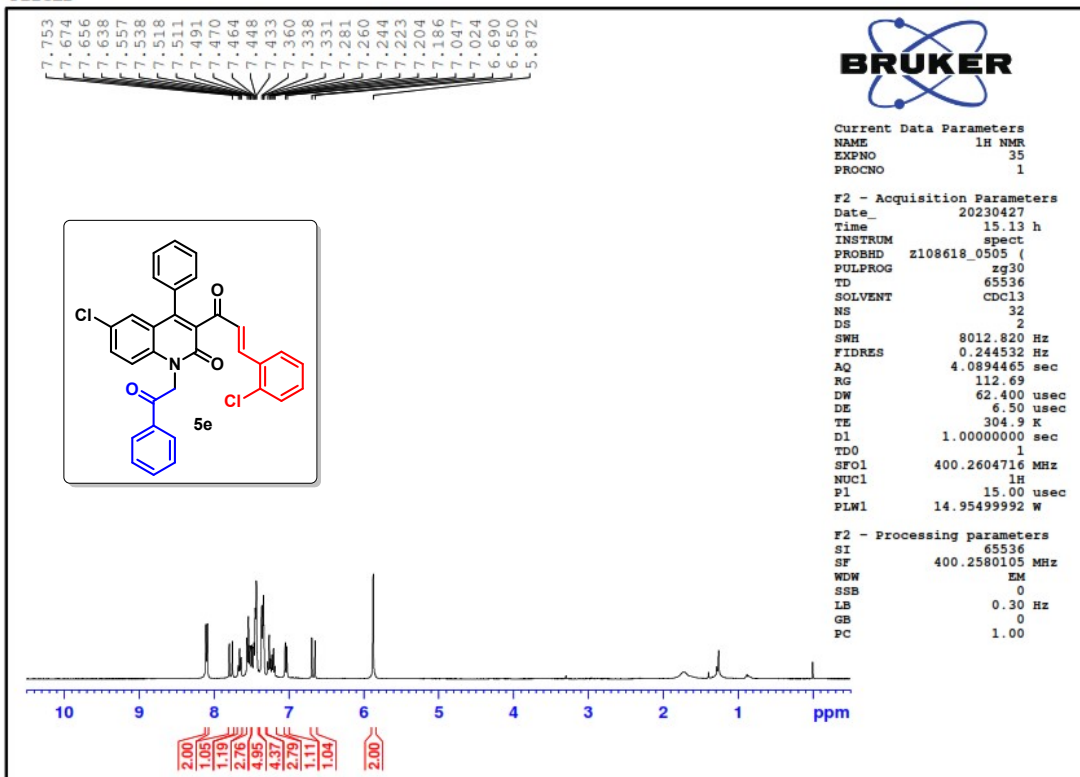

Signature SIF VIT VELLORE  
PB2CL-2

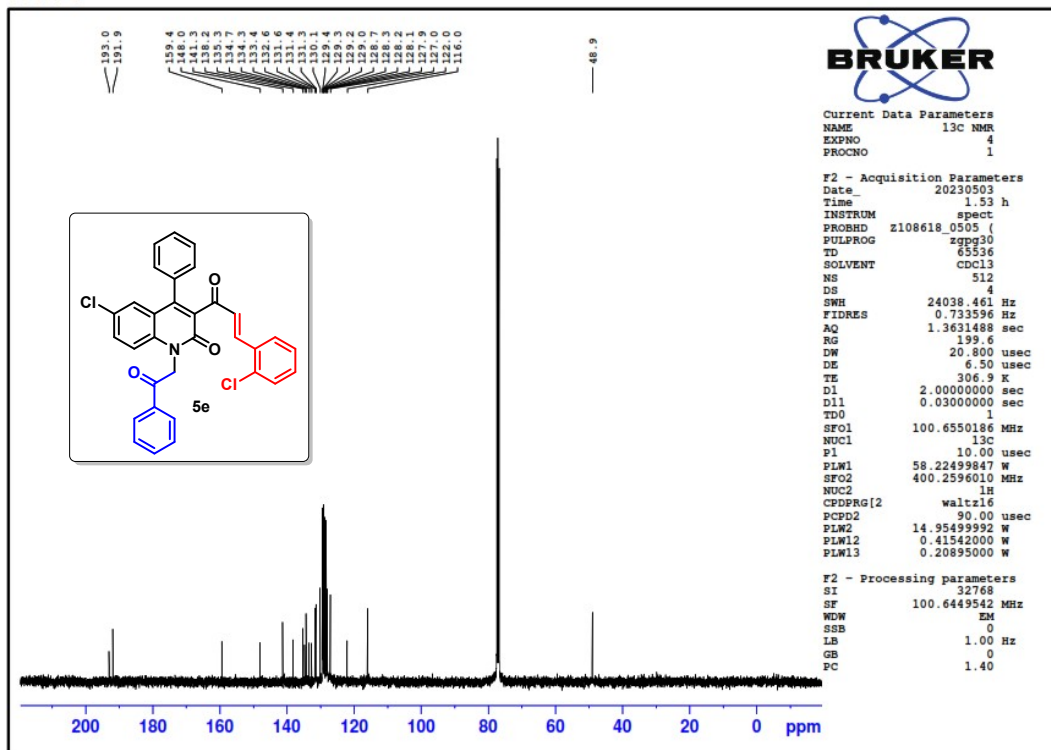

<sup>1</sup>H and <sup>13</sup>C NMR spectra of compound **5e** in CDCl<sub>3</sub>

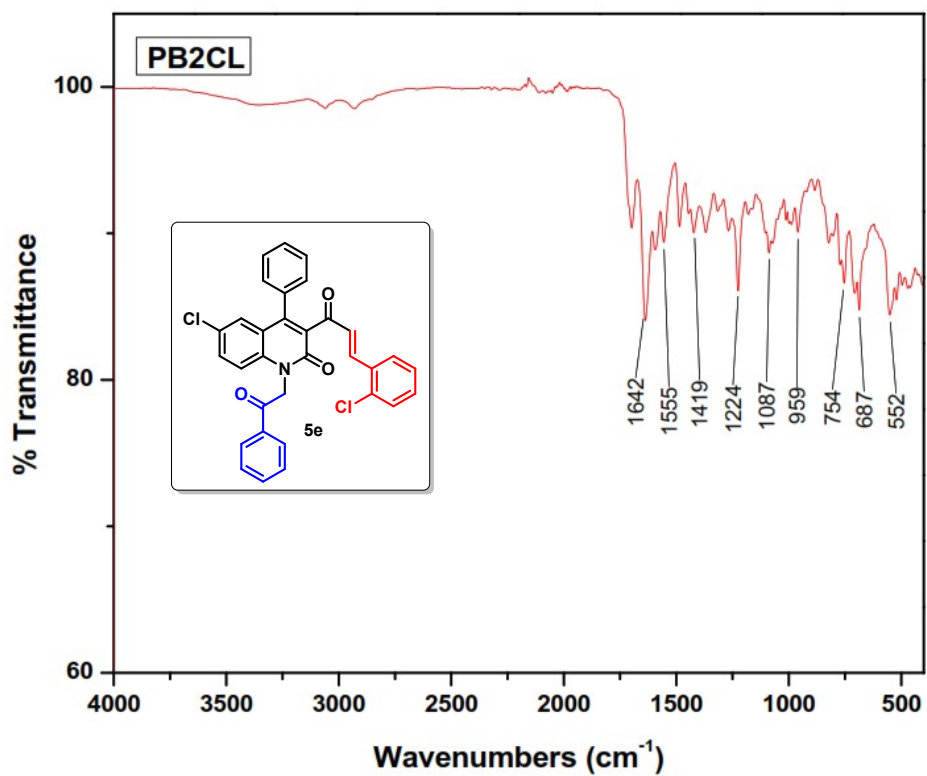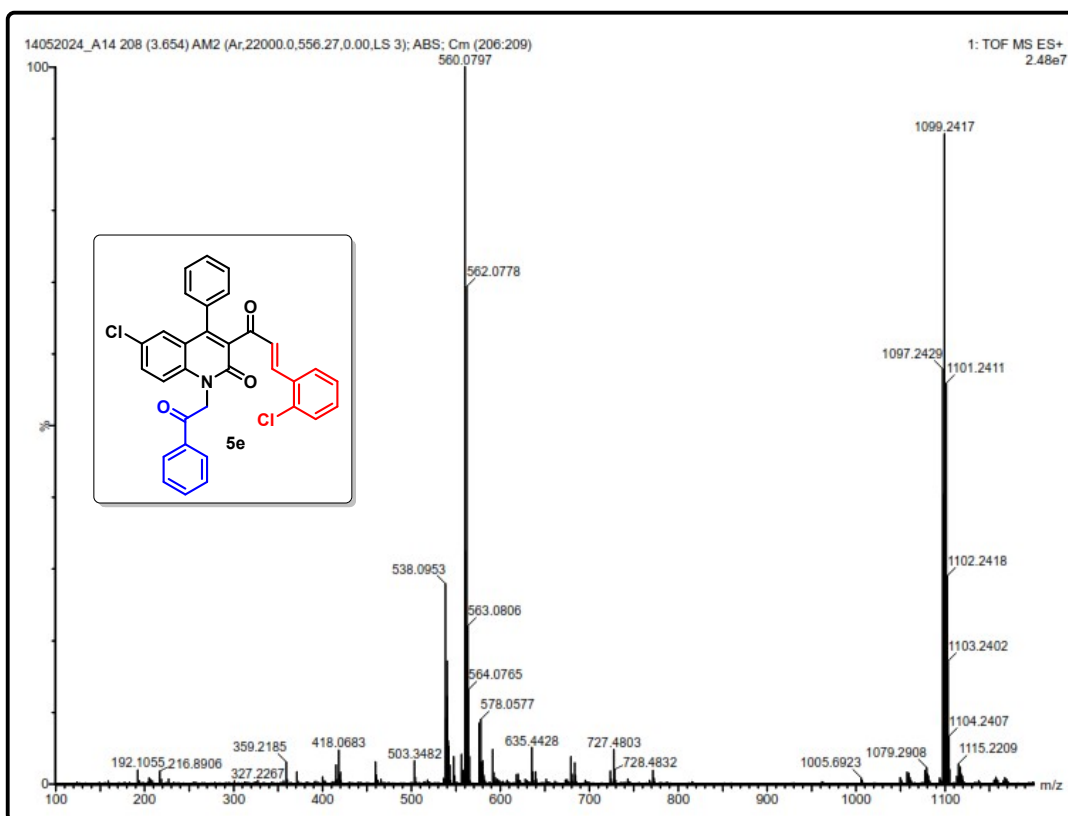

IR and HRMS spectra of compound **5e**

Signature SIF VIT VELLORE  
PB40CL

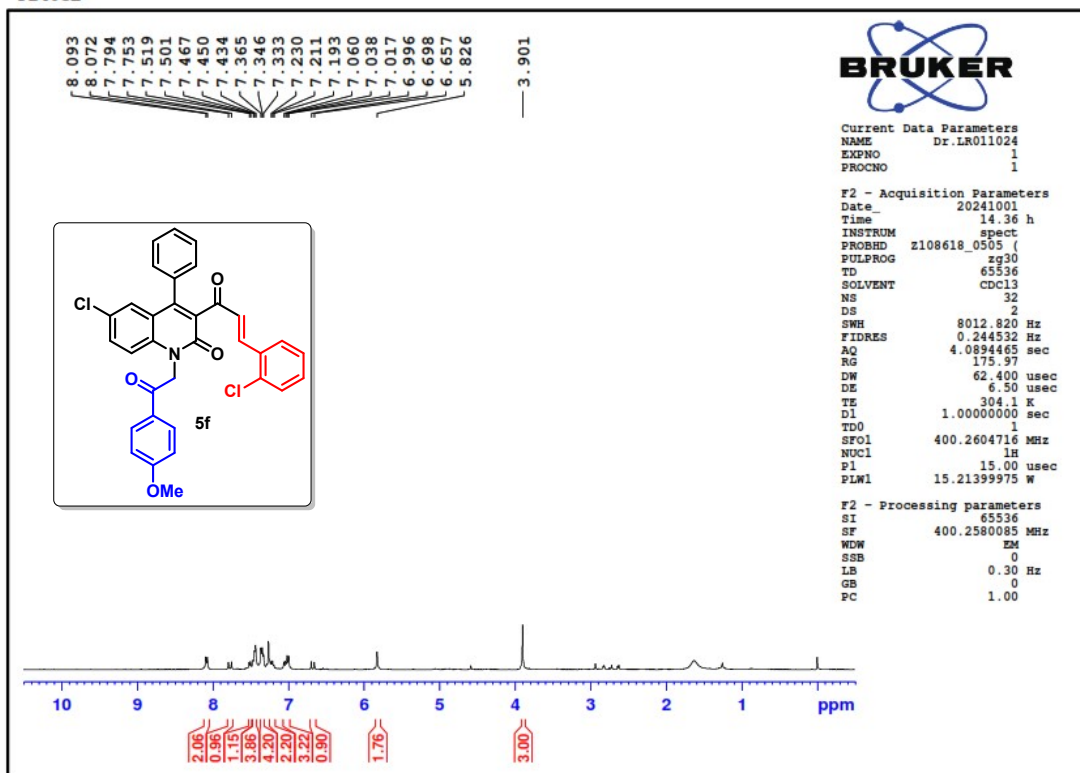

Signature SIF VIT VELLORE  
PB402CL

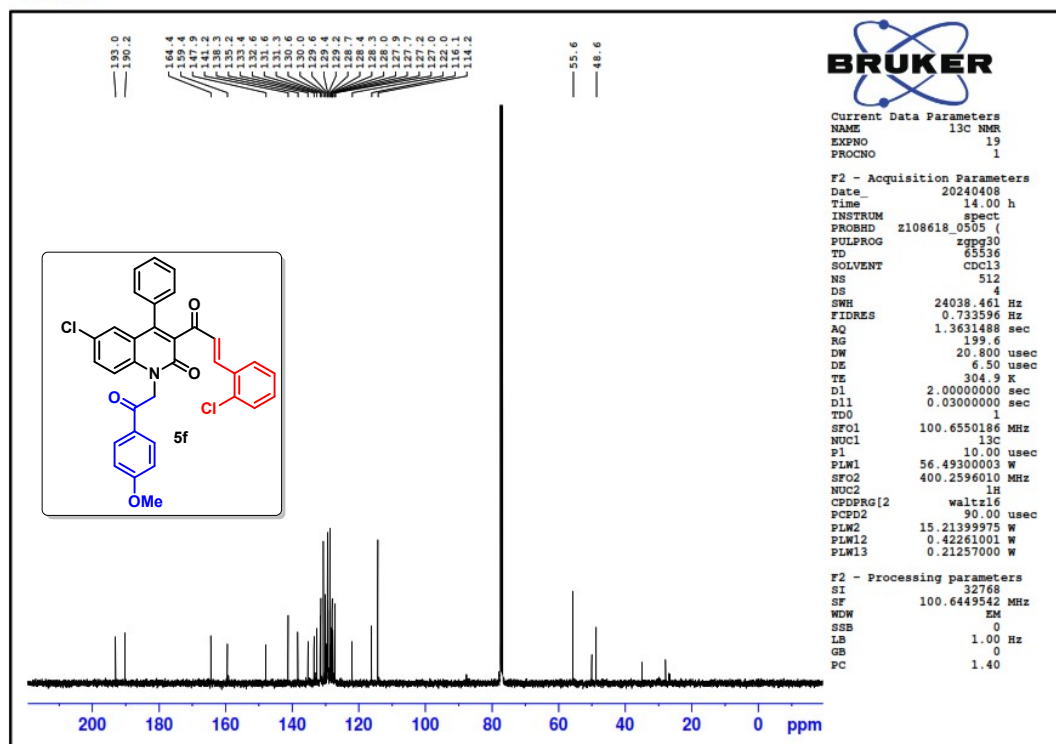

<sup>1</sup>H and <sup>13</sup>C NMR spectra of compound **5f** in CDCl<sub>3</sub>



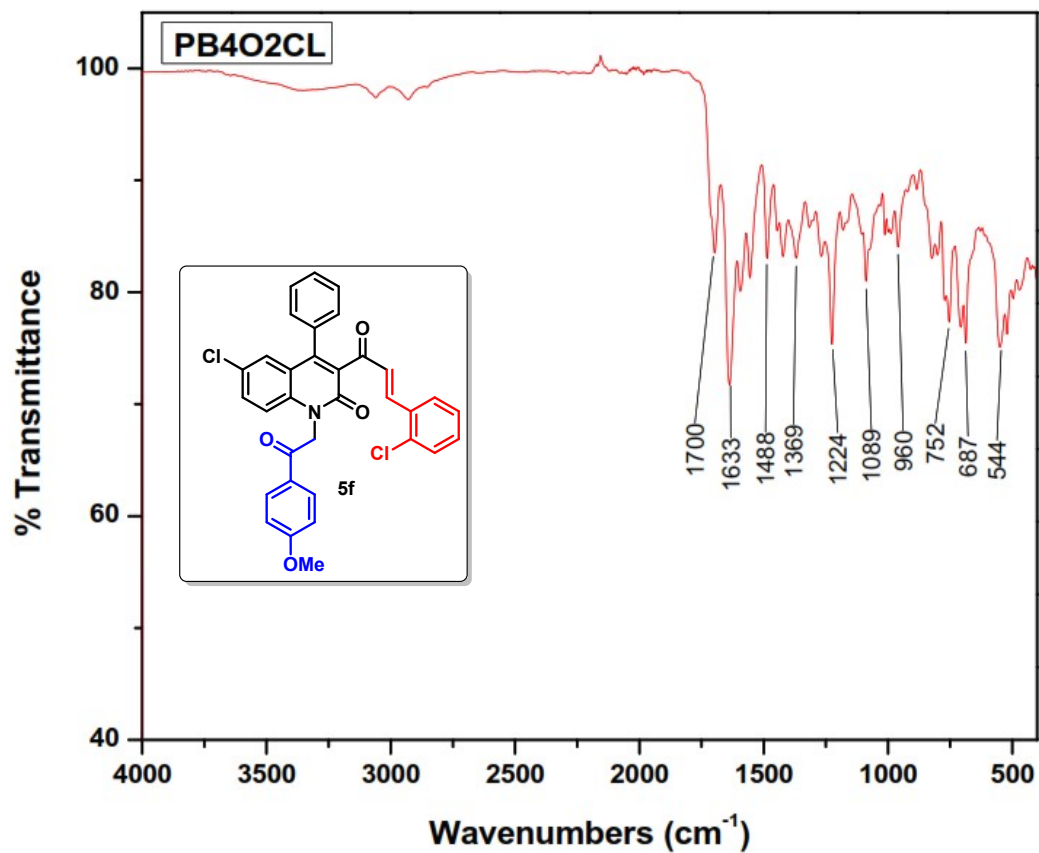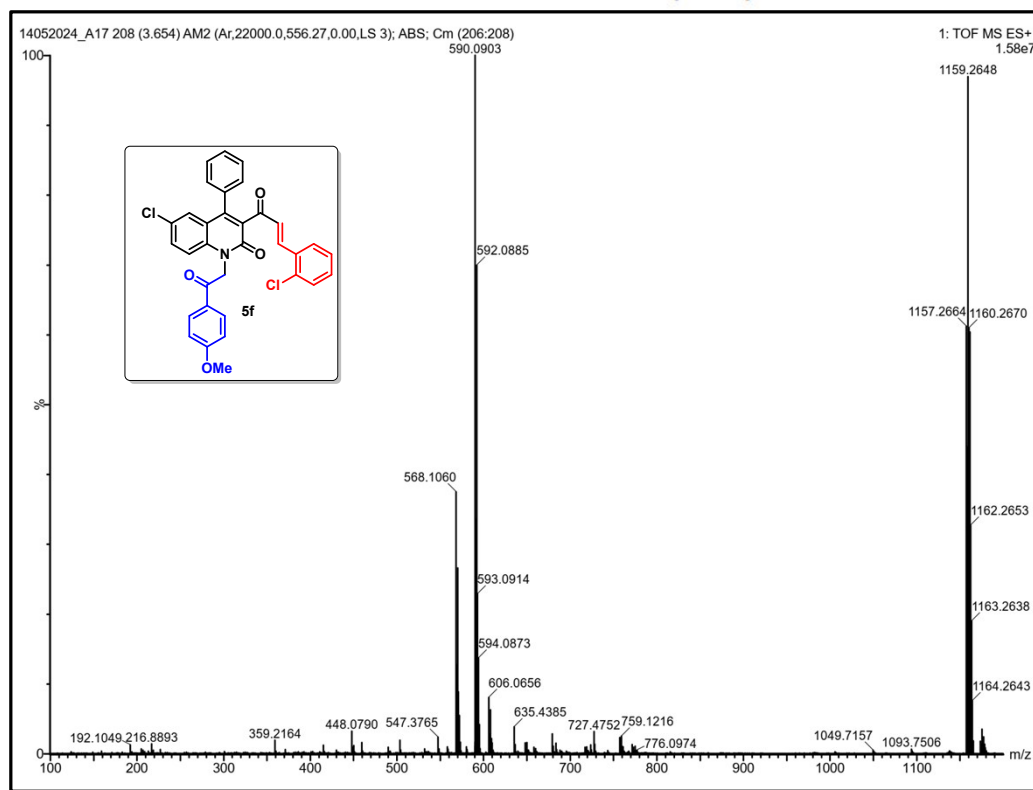

IR and HRMS spectra of compound **5f**

PB4CL4CL

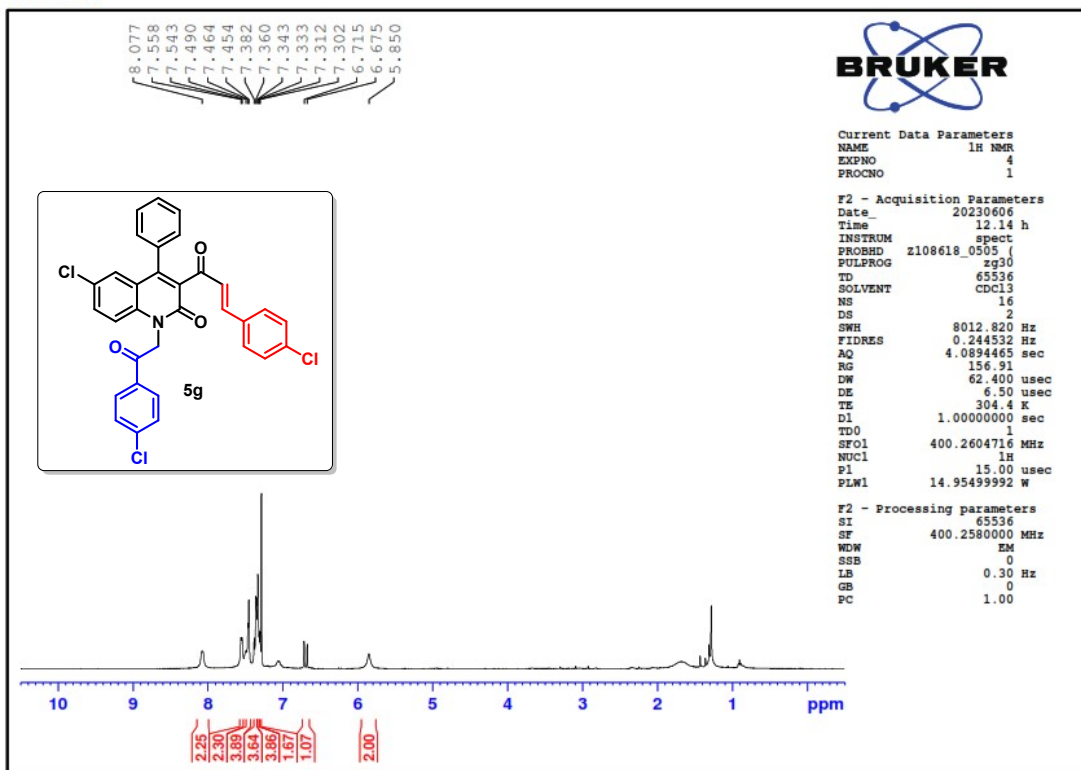

Signature SIF VIT VELLORE  
PB4CL4CL

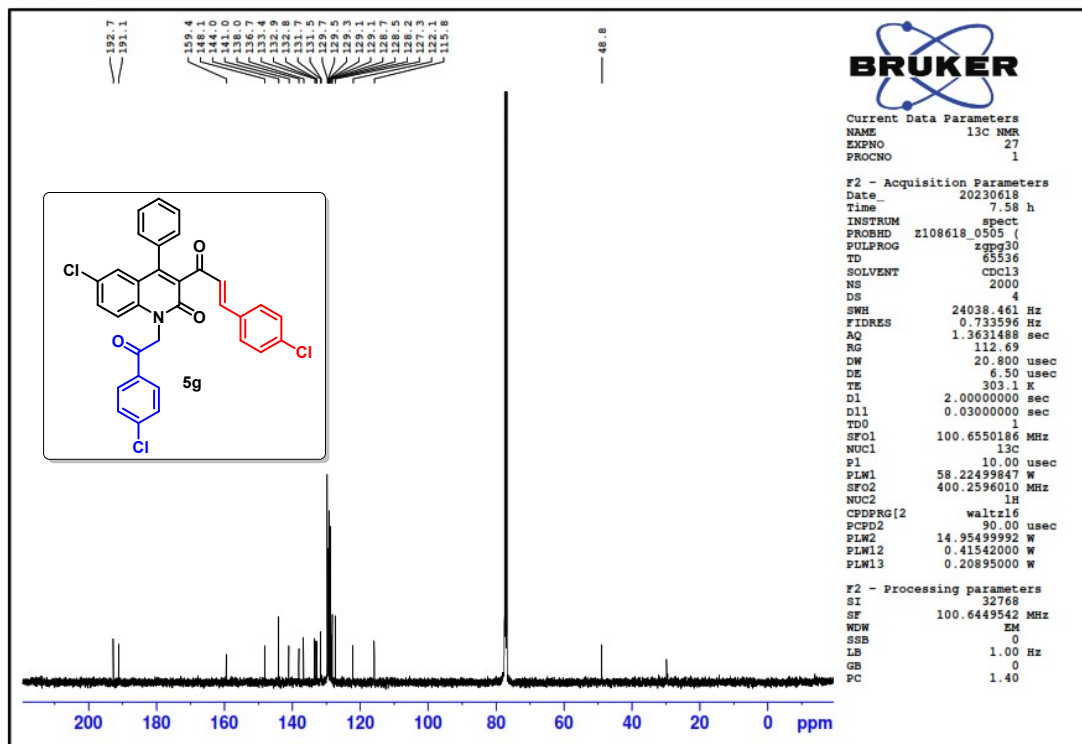

<sup>1</sup>H and <sup>13</sup>C NMR spectra of compound 5g in CDCl<sub>3</sub>

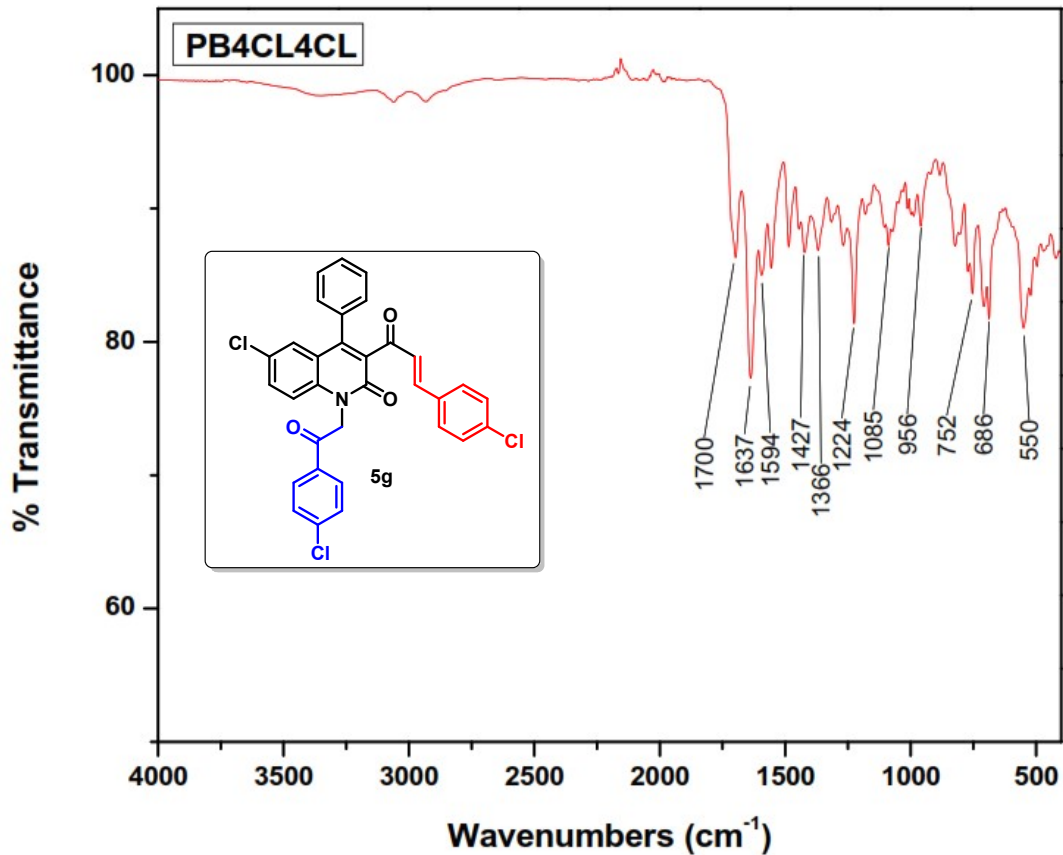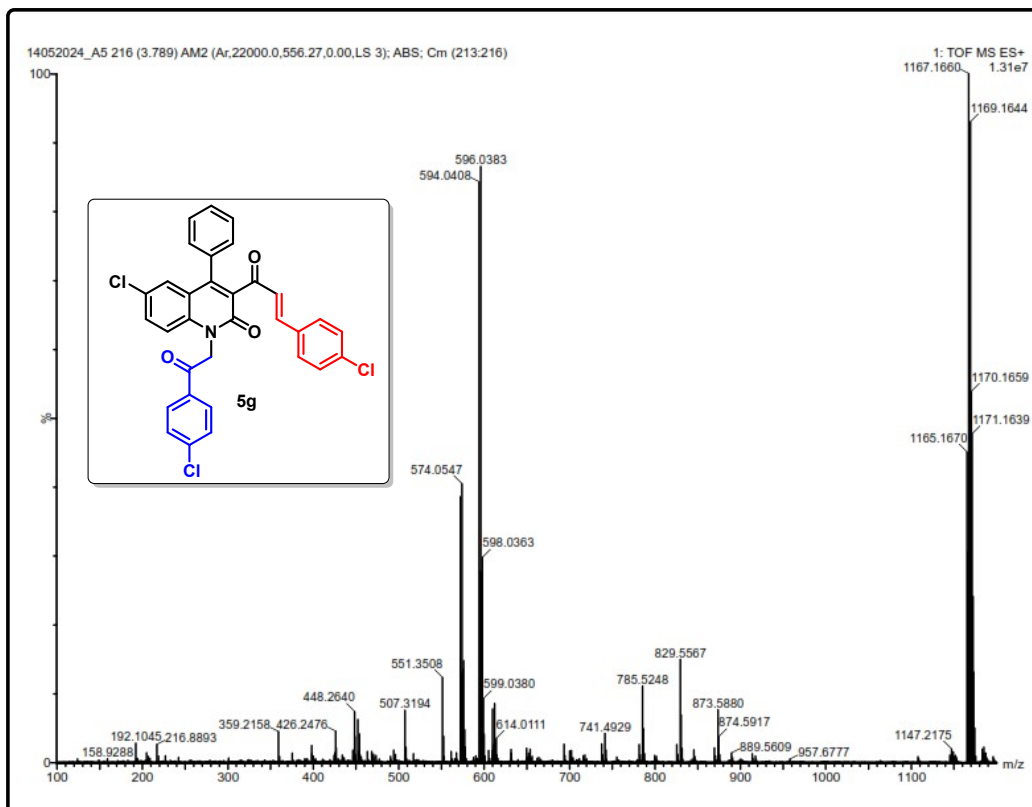

IR and HRMS spectra of compound **5g**

Signature SIF VIT VELLORE  
4CLPB4F

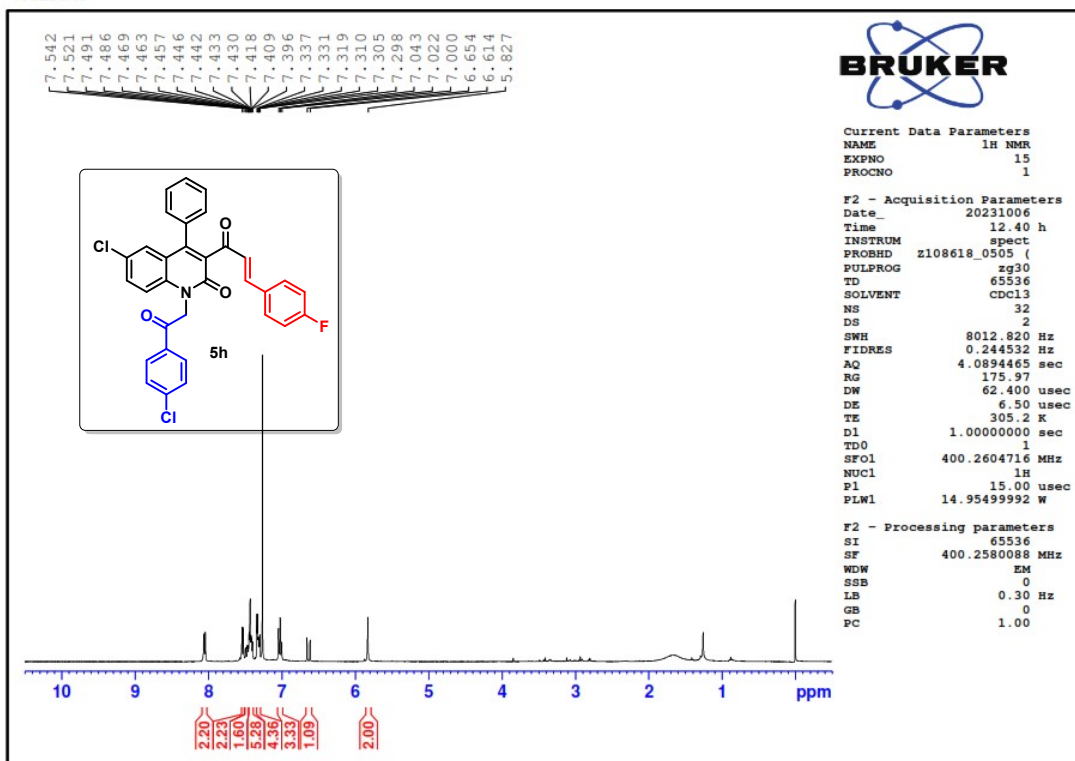

Signature SIF VIT VELLORE  
4C1PB4F

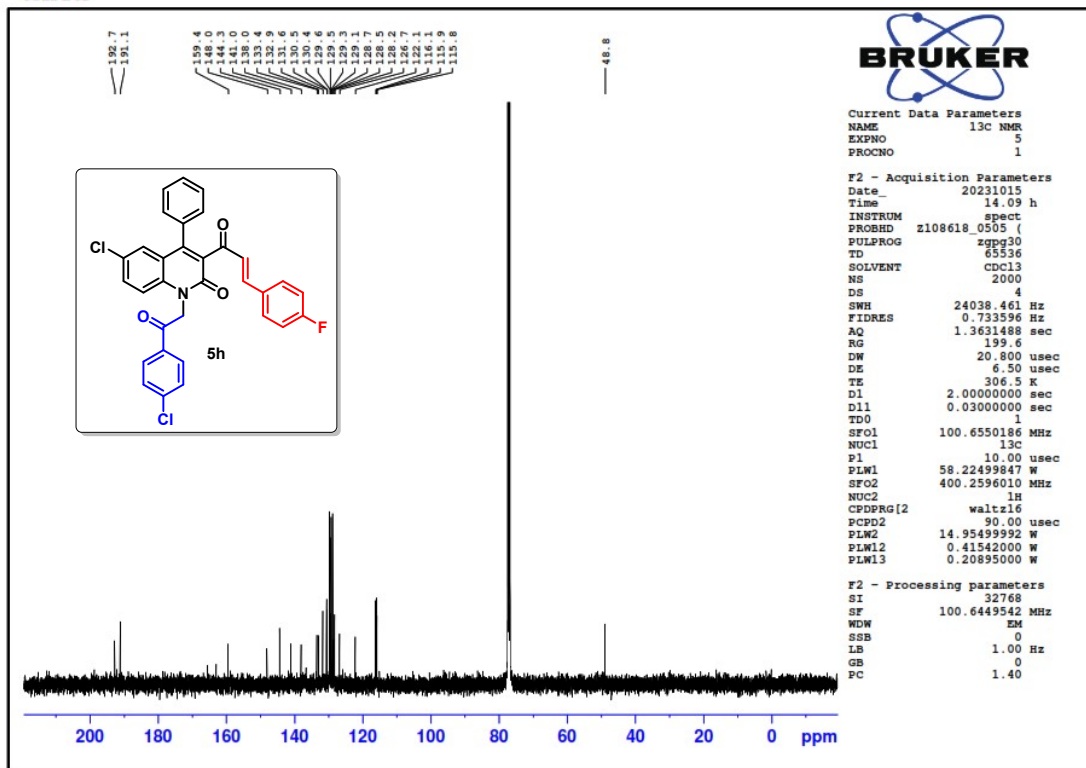

$^1\text{H}$  and  $^{13}\text{C}$  NMR spectra of compound **5h** in  $\text{CDCl}_3$

Signature SIF VIT VELLORE  
4CLPB4

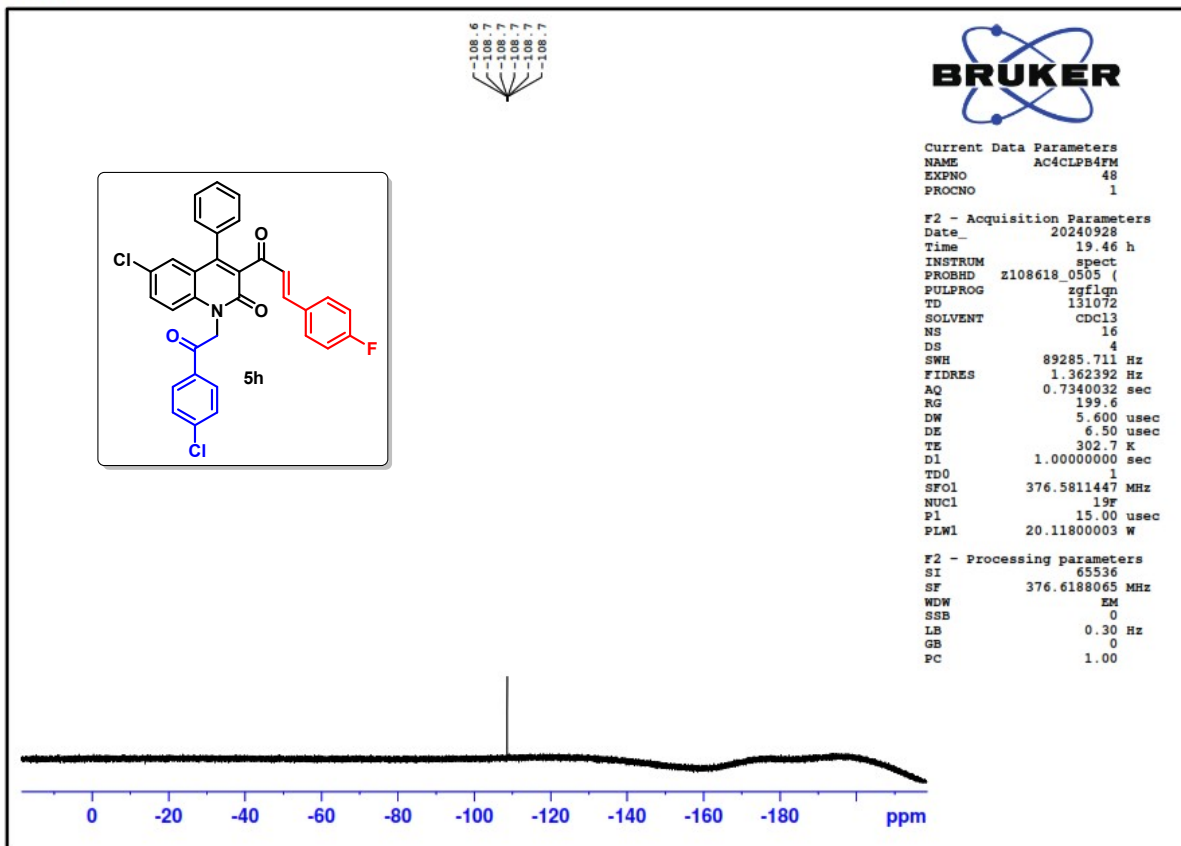

$^{19}\text{F}$  spectra of compound **5h**

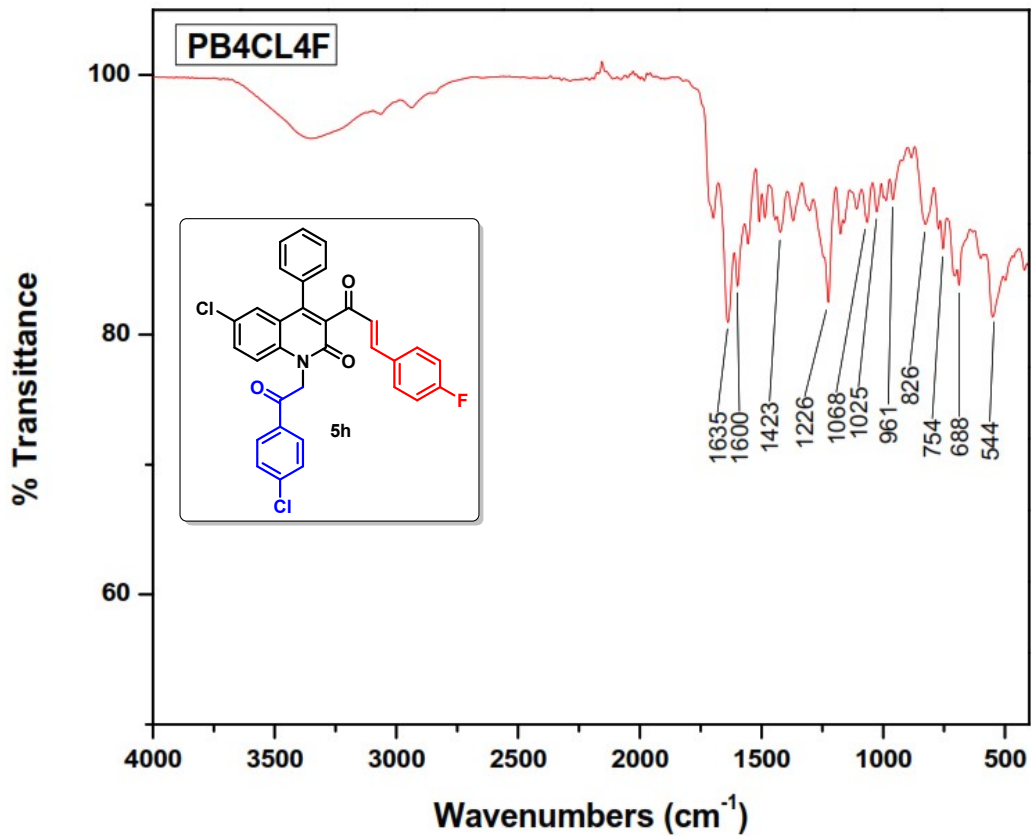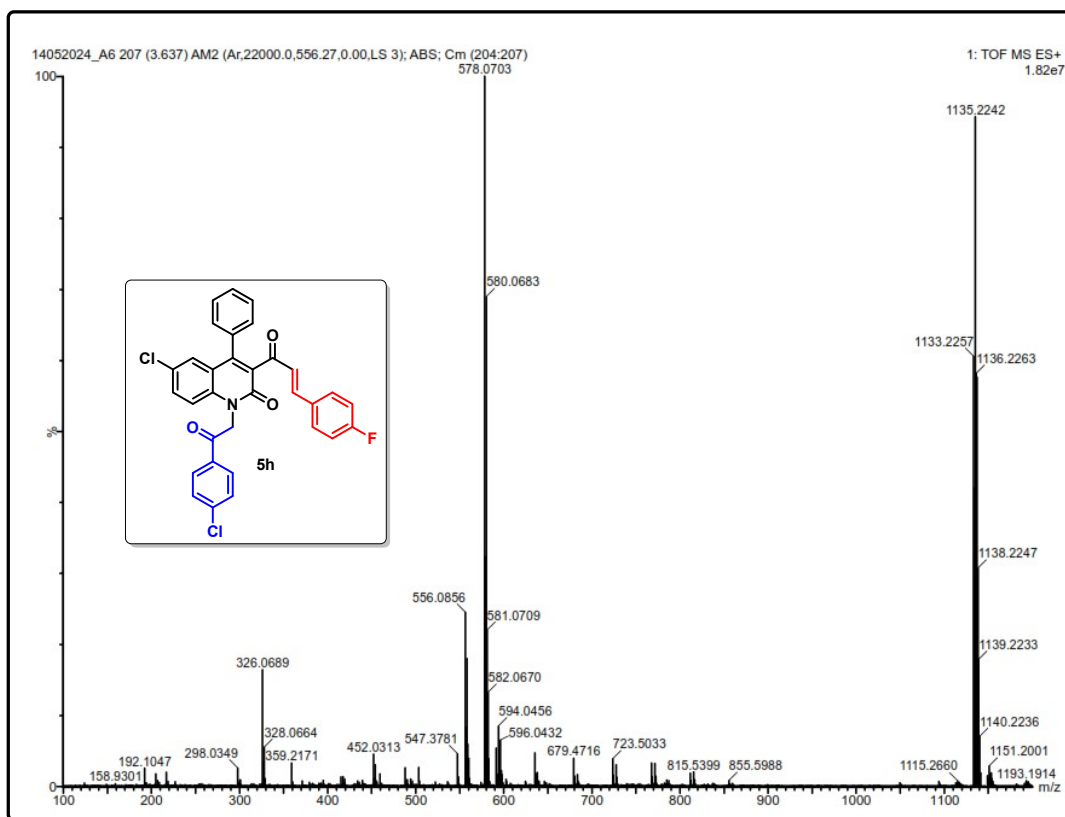

IR and HRMS spectra of compound **5h**

Signature SIF VIT VELLORE  
BCPT

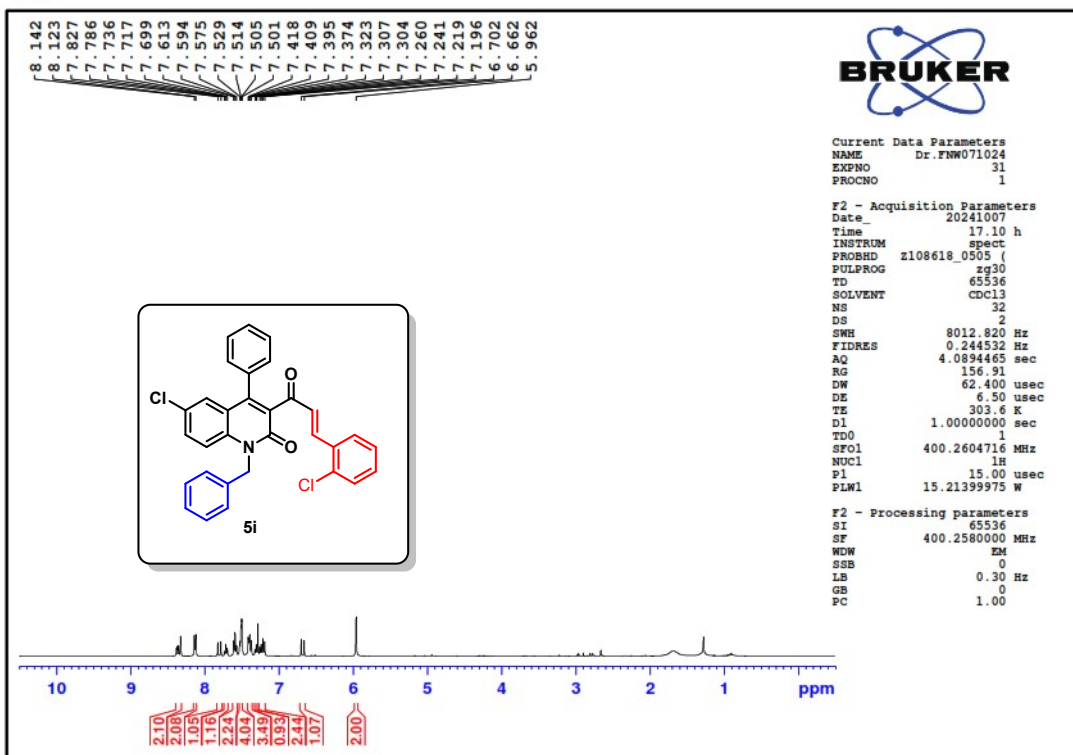

Signature SIF VIT VELLORE  
BCPT

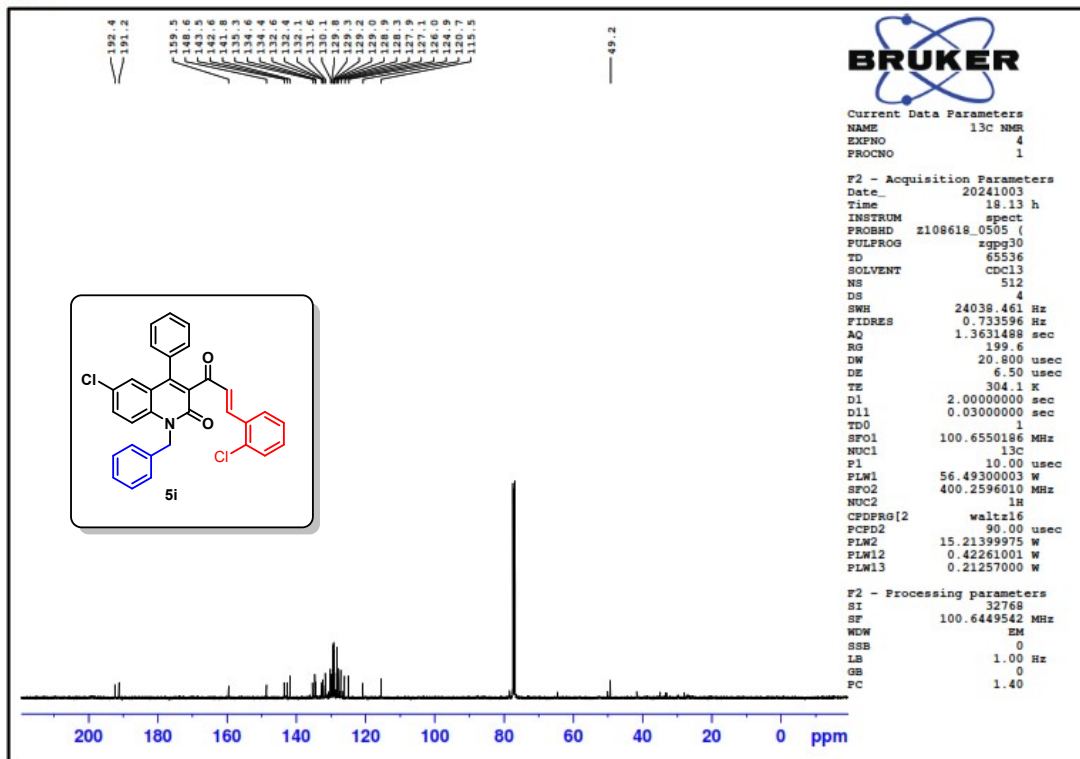

$^1\text{H}$  and  $^{13}\text{C}$  NMR spectra of compound **5i** in  $\text{CDCl}_3$

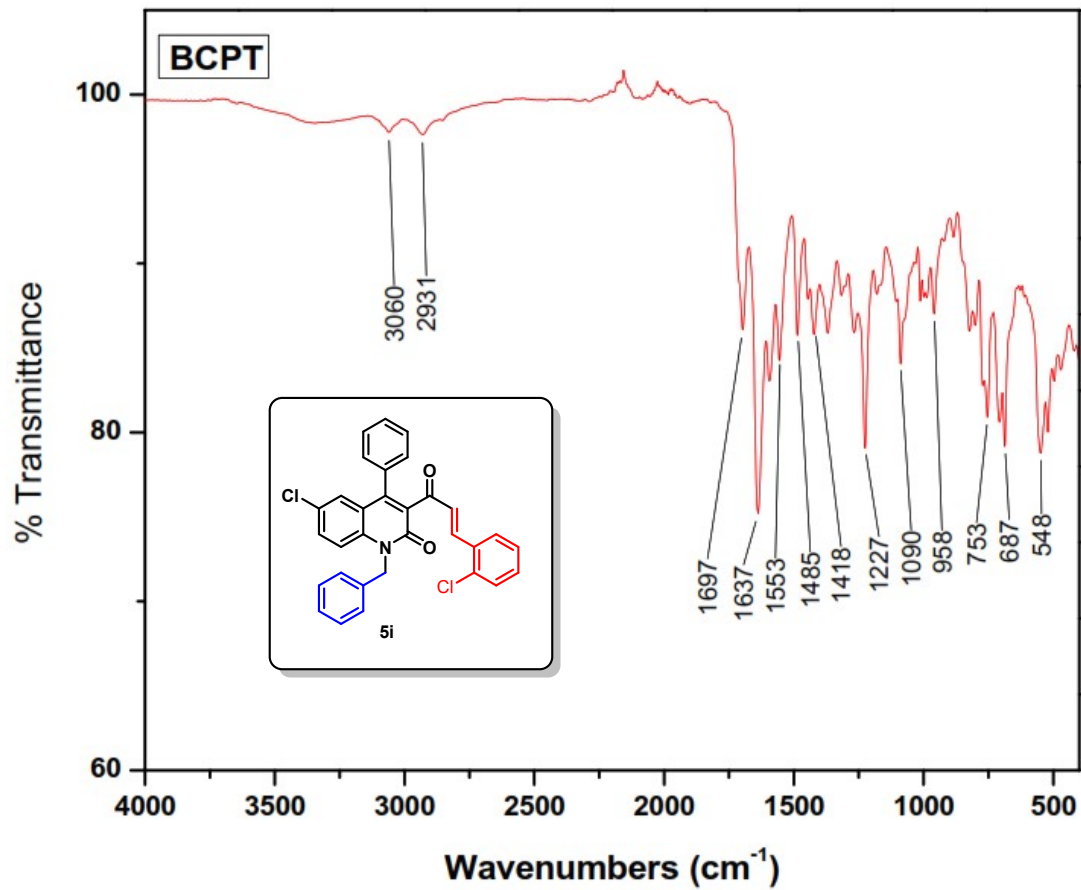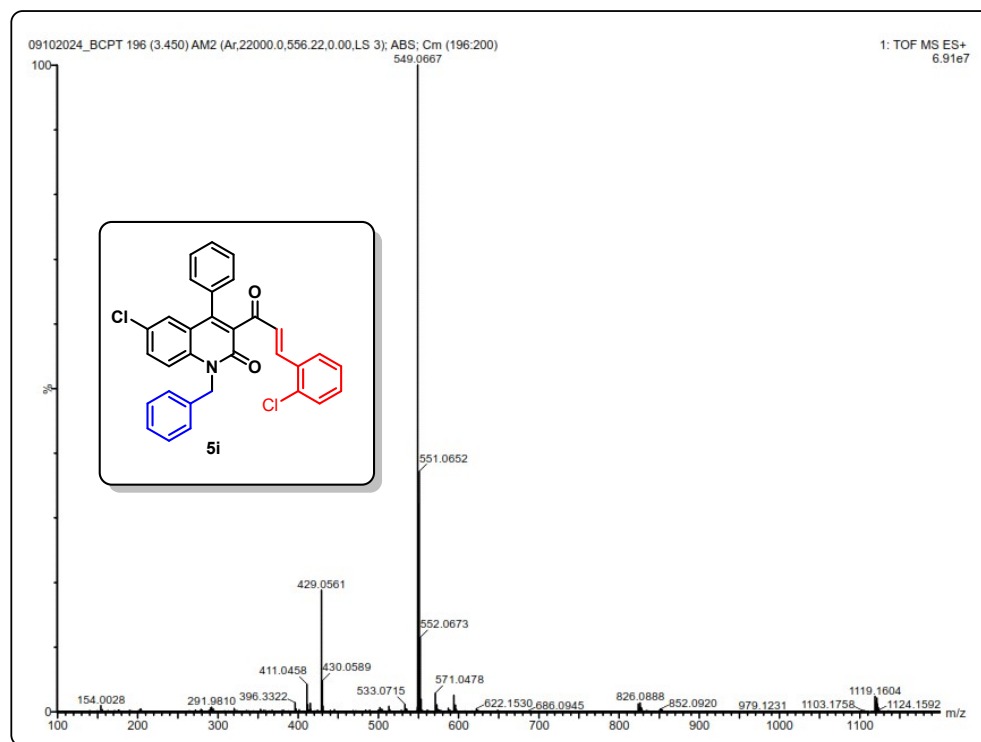

IR and HRMS spectra of compound **5i**



Signature SIF VIT VELLORE  
AC4NO2

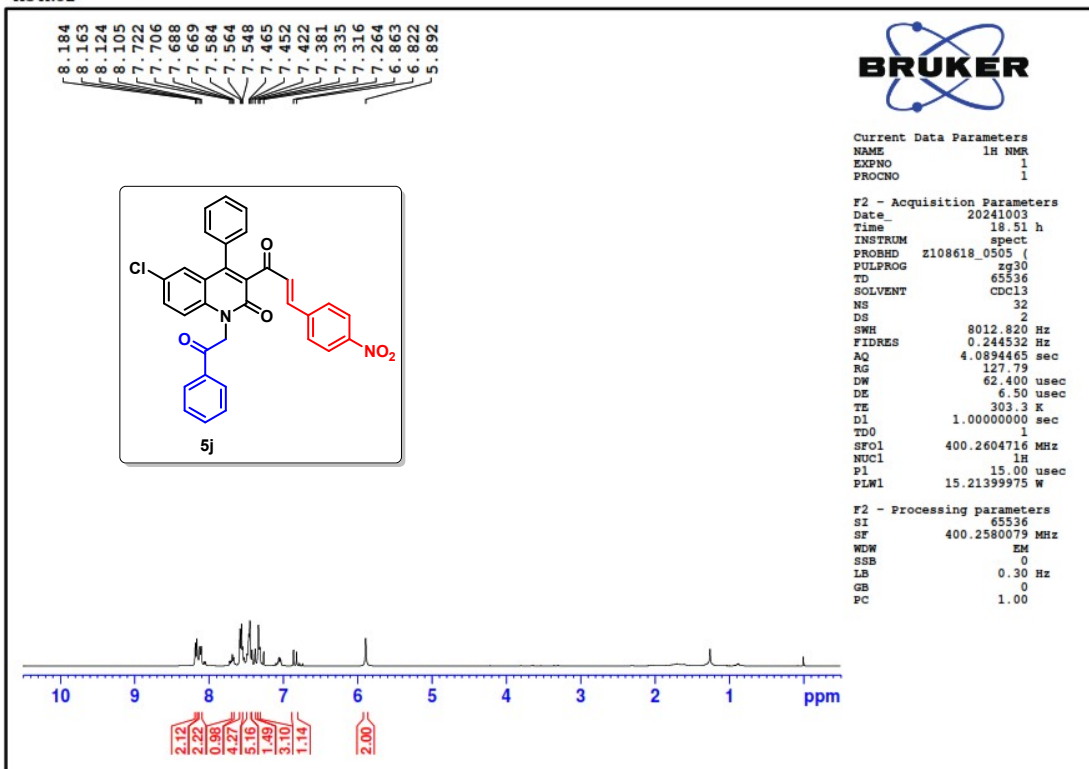

Signature SIF VIT VELLORE  
AC4NO2

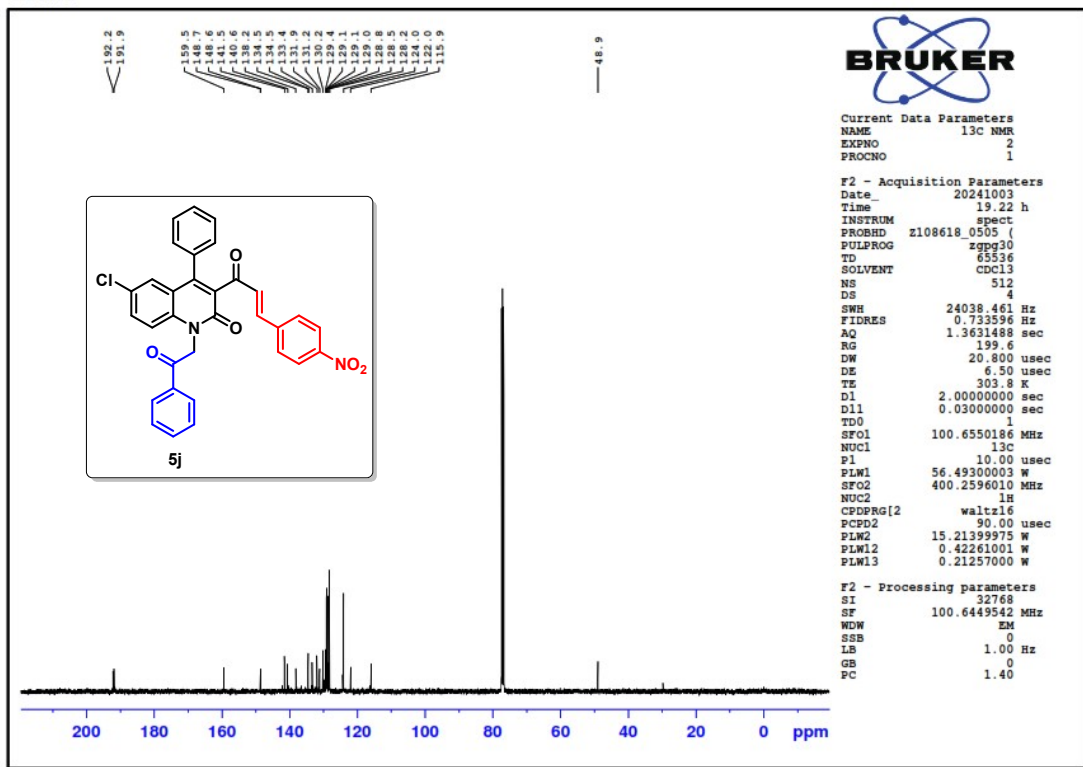

$^1\text{H}$  and  $^{13}\text{C}$  NMR spectra of compound **5j** in  $\text{CDCl}_3$

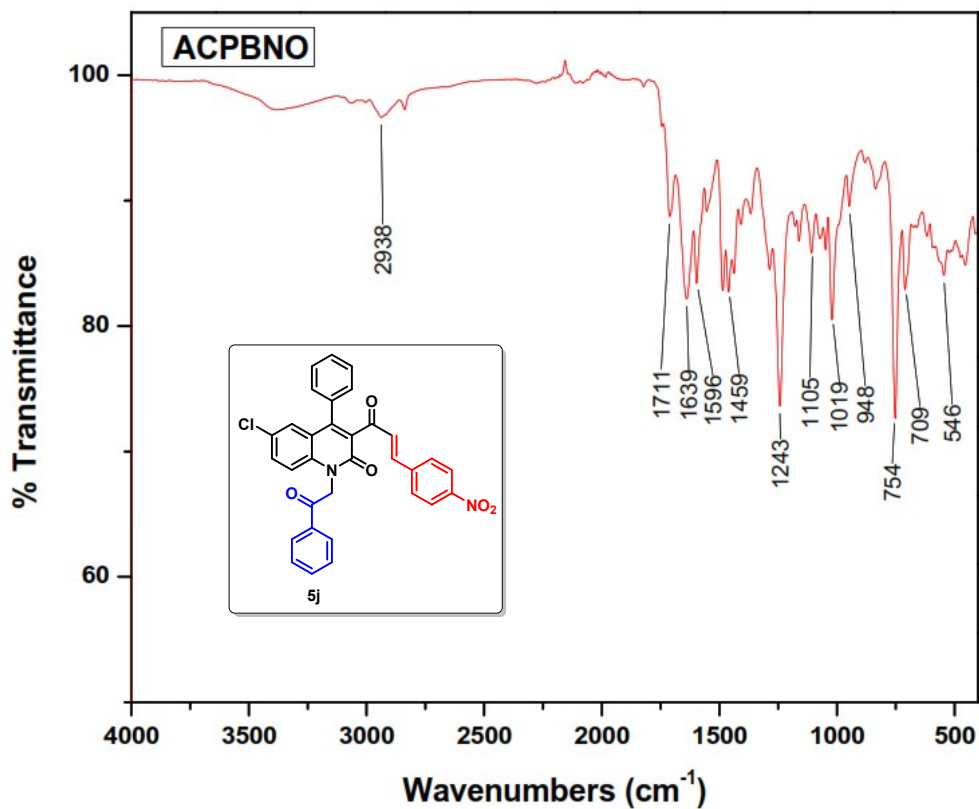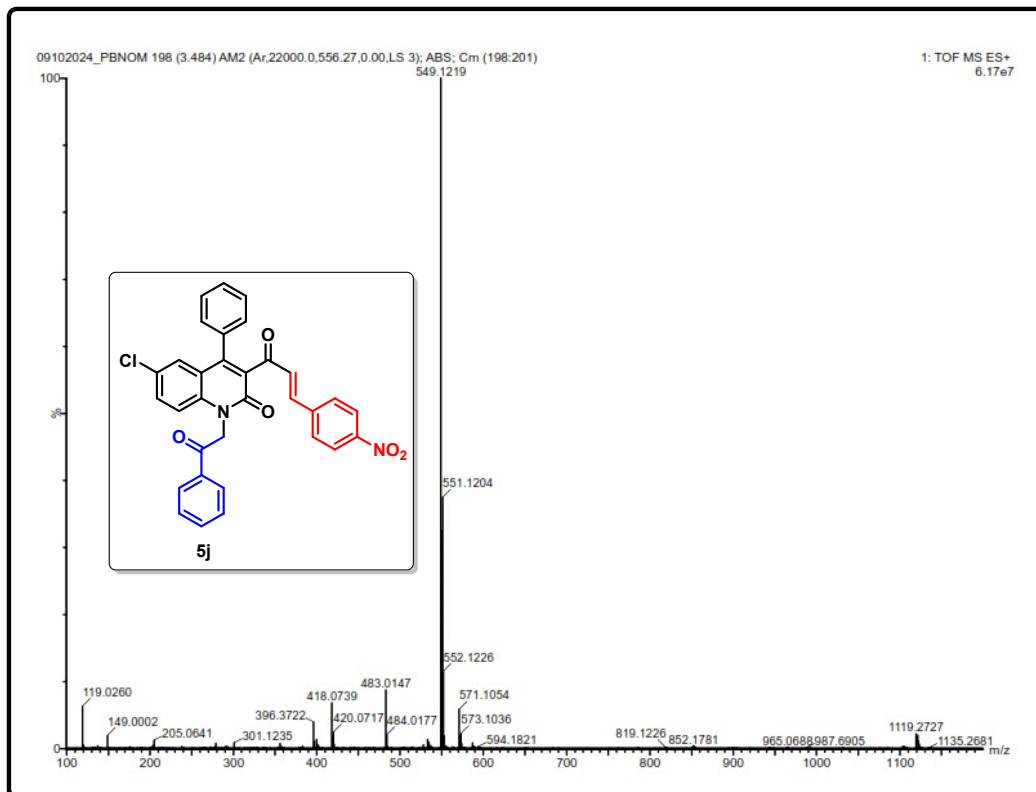

IR and HRMS spectra of compound **5j**



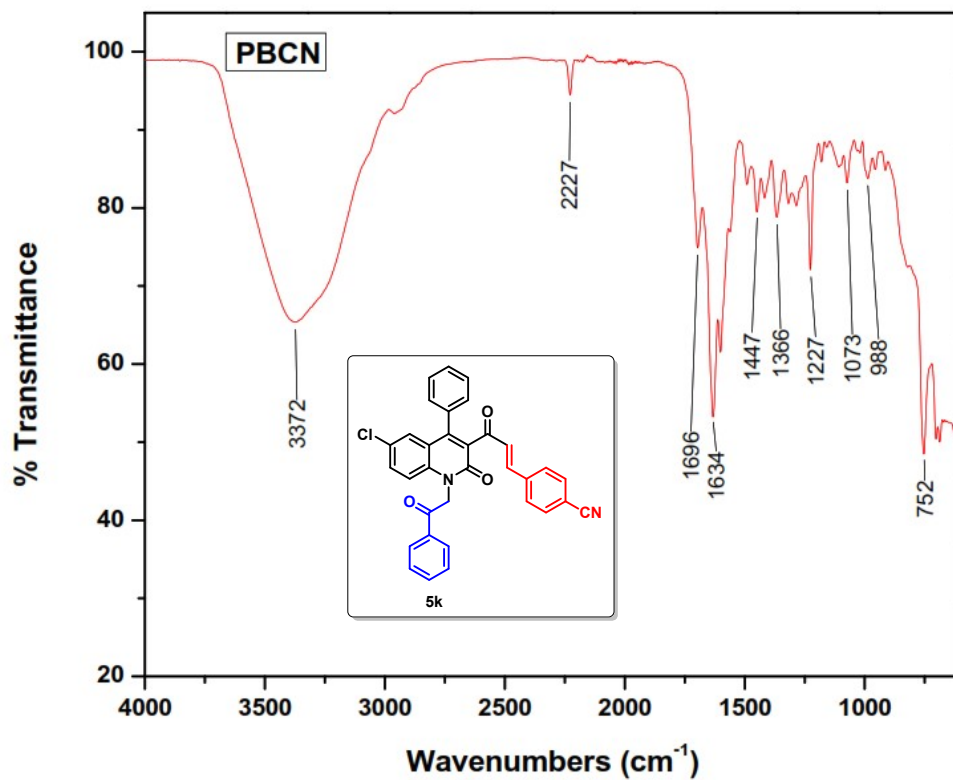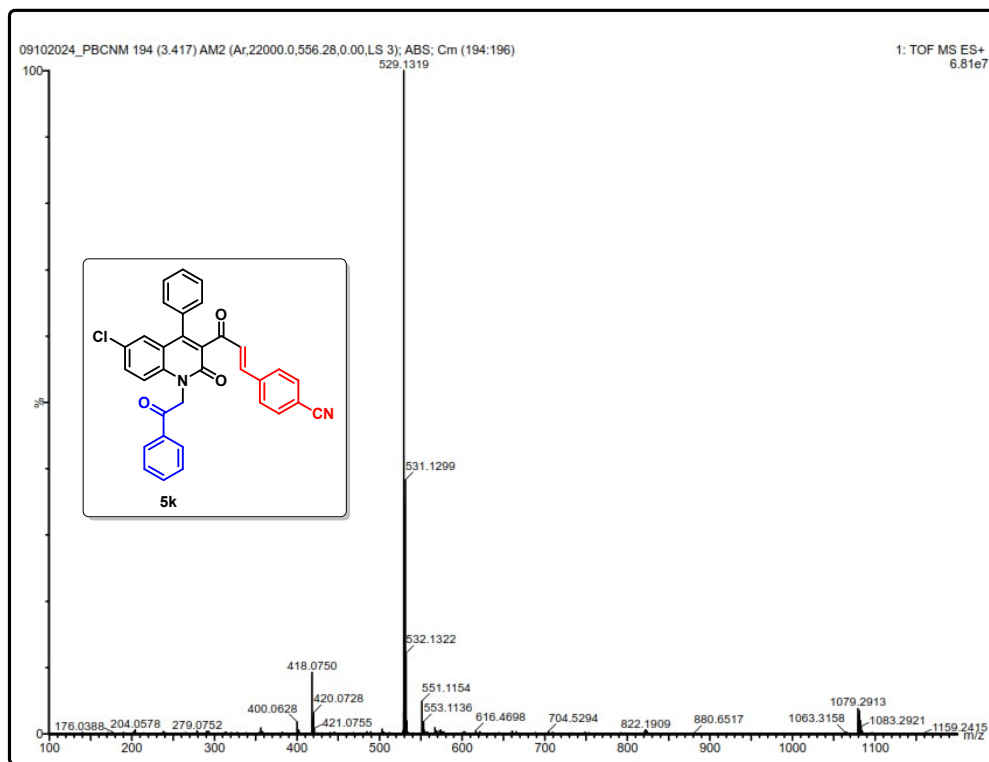

IR and HRMS spectra of compound **5k**

Signature SIF VIT VELLORE  
NB2CL

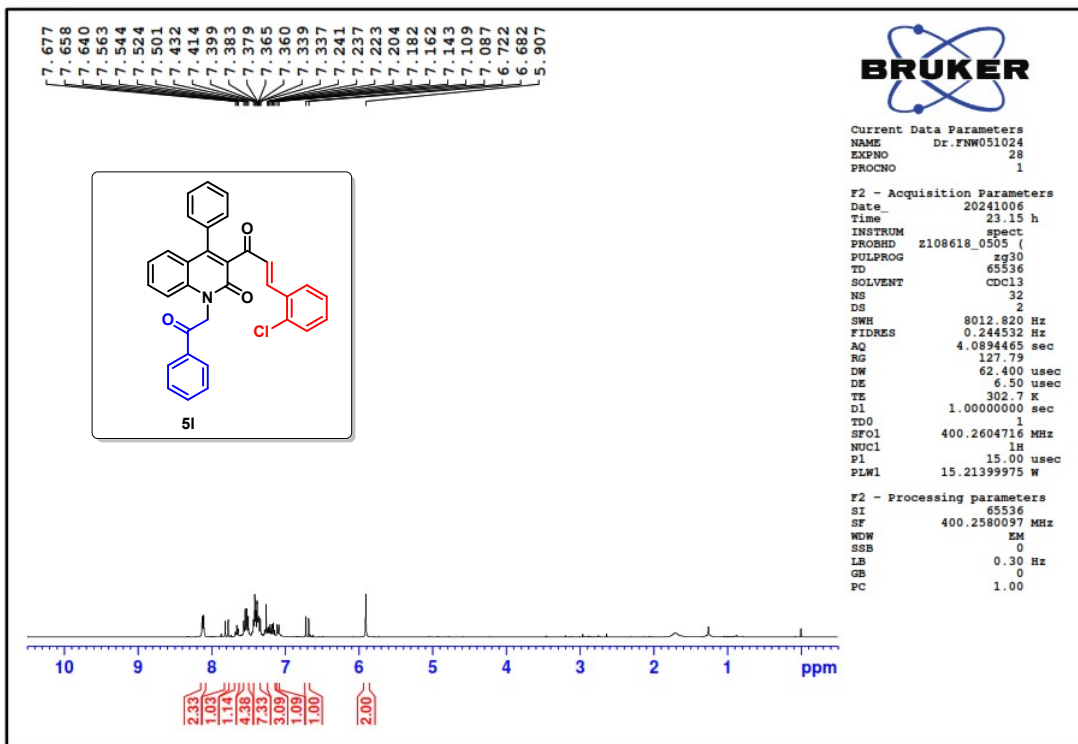

Signature SIF VIT VELLORE  
NB2CL

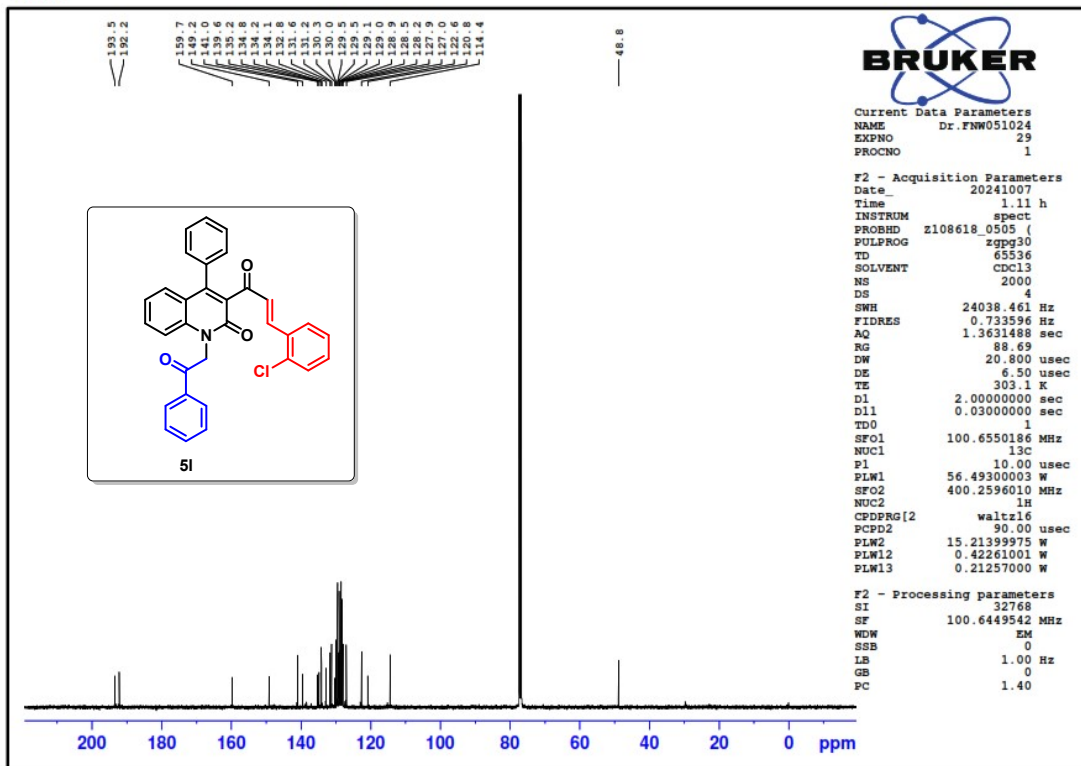

$^1\text{H}$  and  $^{13}\text{C}$  NMR spectra of compound **5I** in  $\text{CDCl}_3$

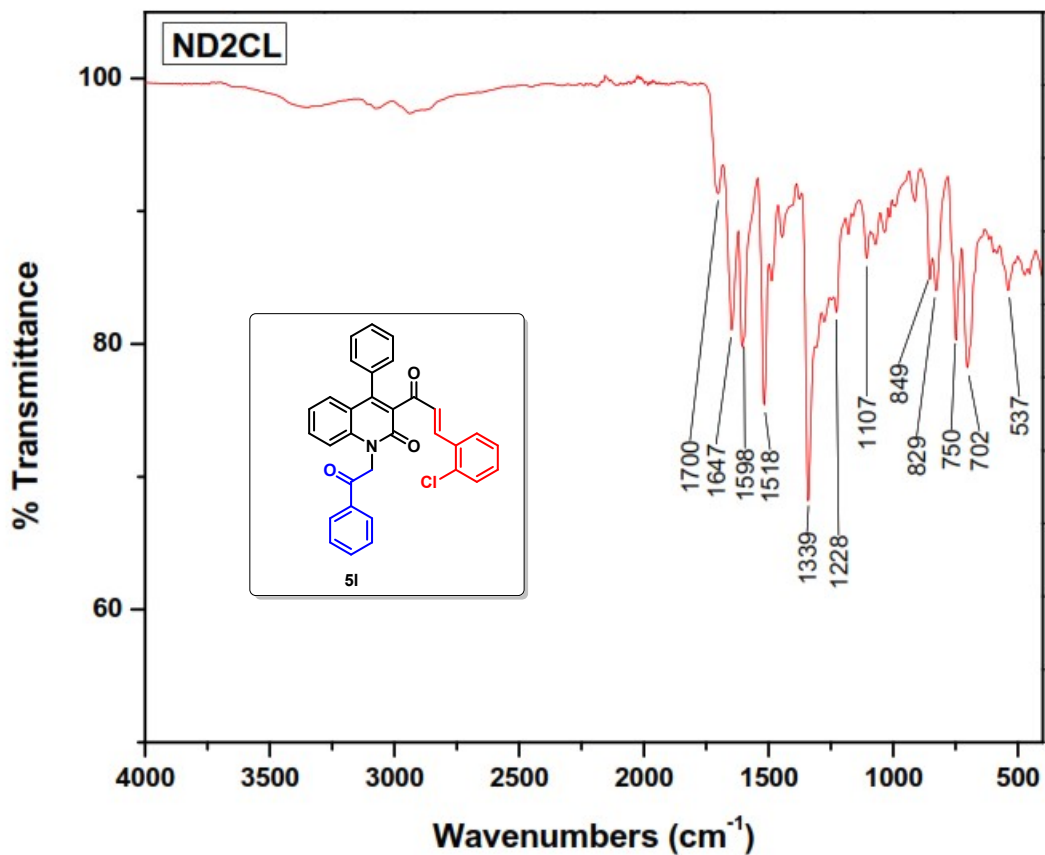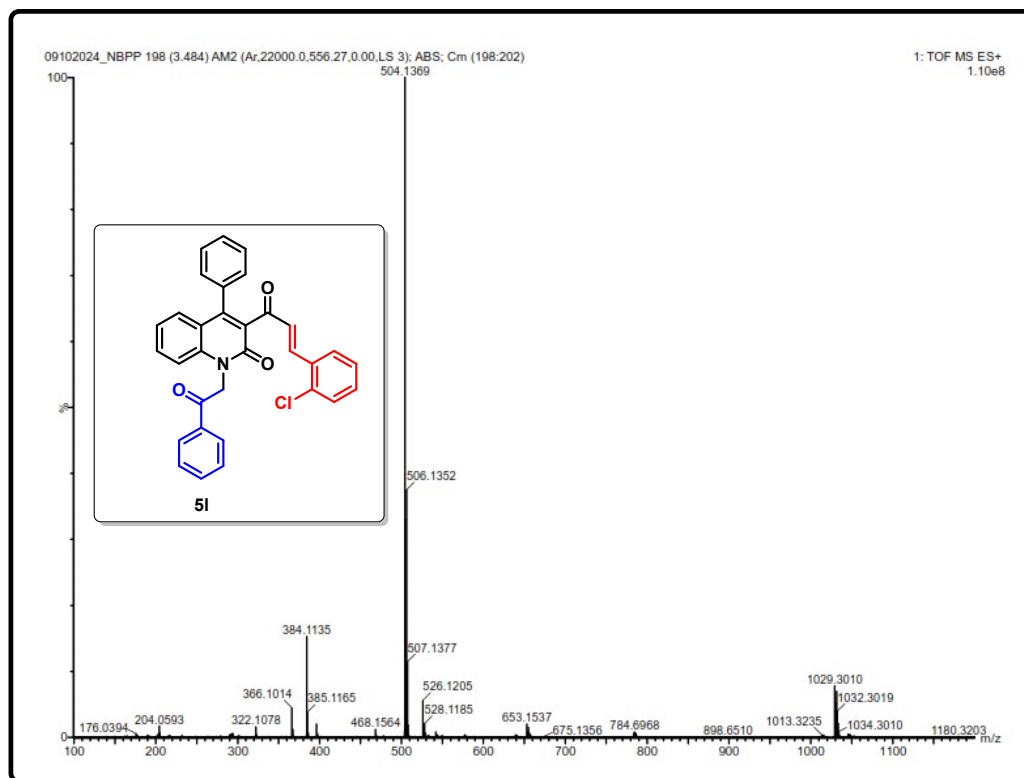

IR and HRMS spectra of compound **5I**

Signature SIF VIT VELLORE  
ACPB40ME

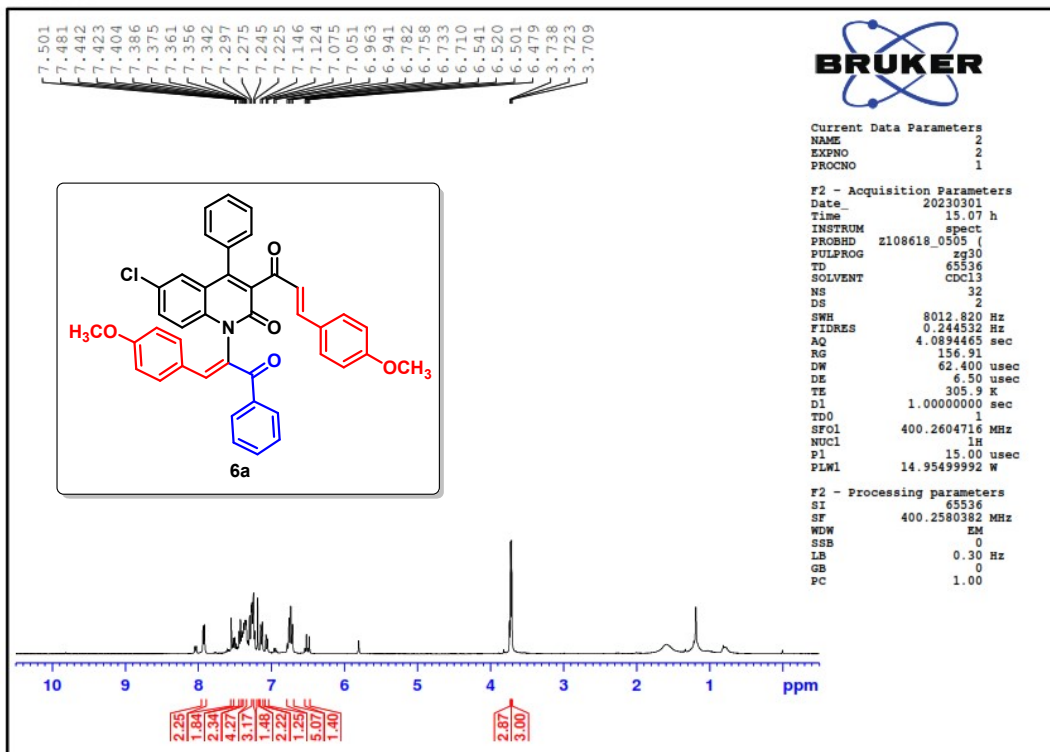

Signature SIF VIT VELLORE  
ACPB40ME

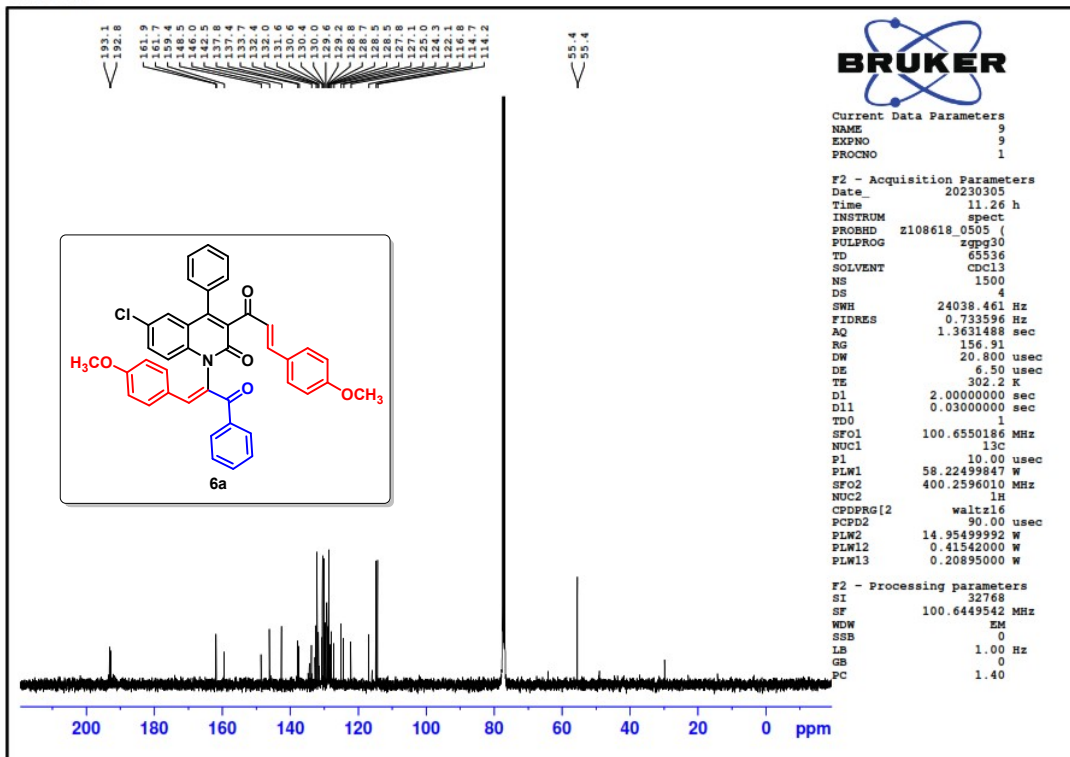

$^1\text{H}$  and  $^{13}\text{C}$  NMR spectra of compound **6a** in  $\text{CDCl}_3$

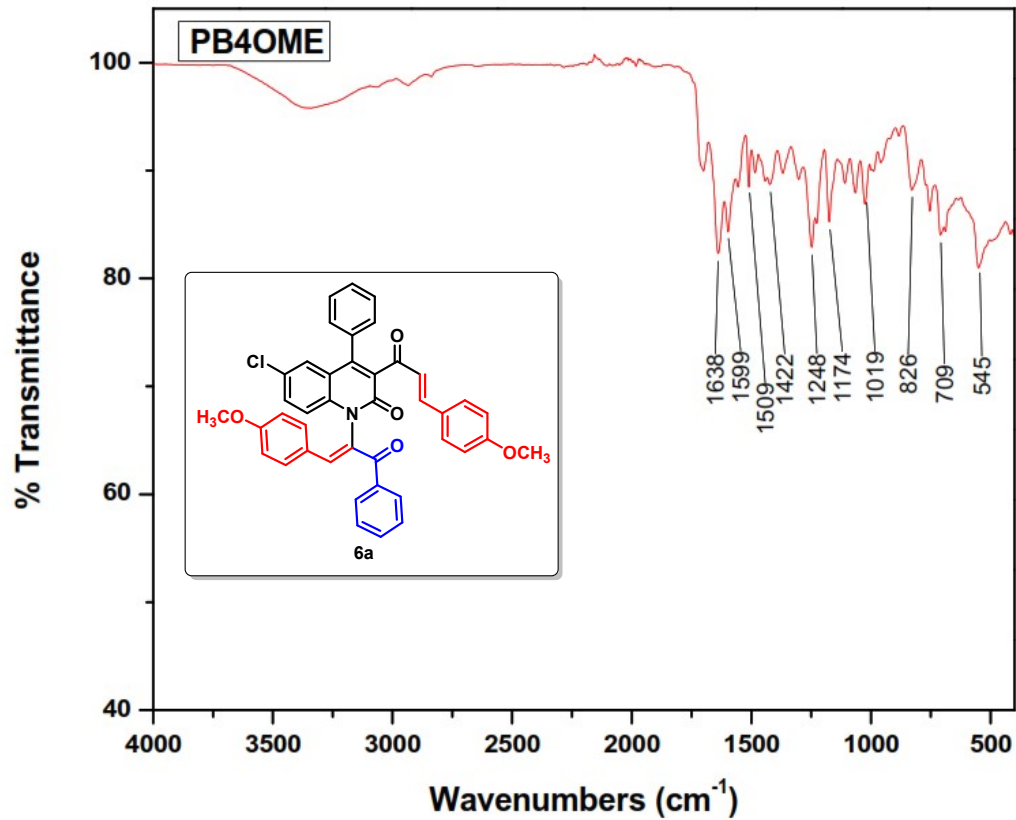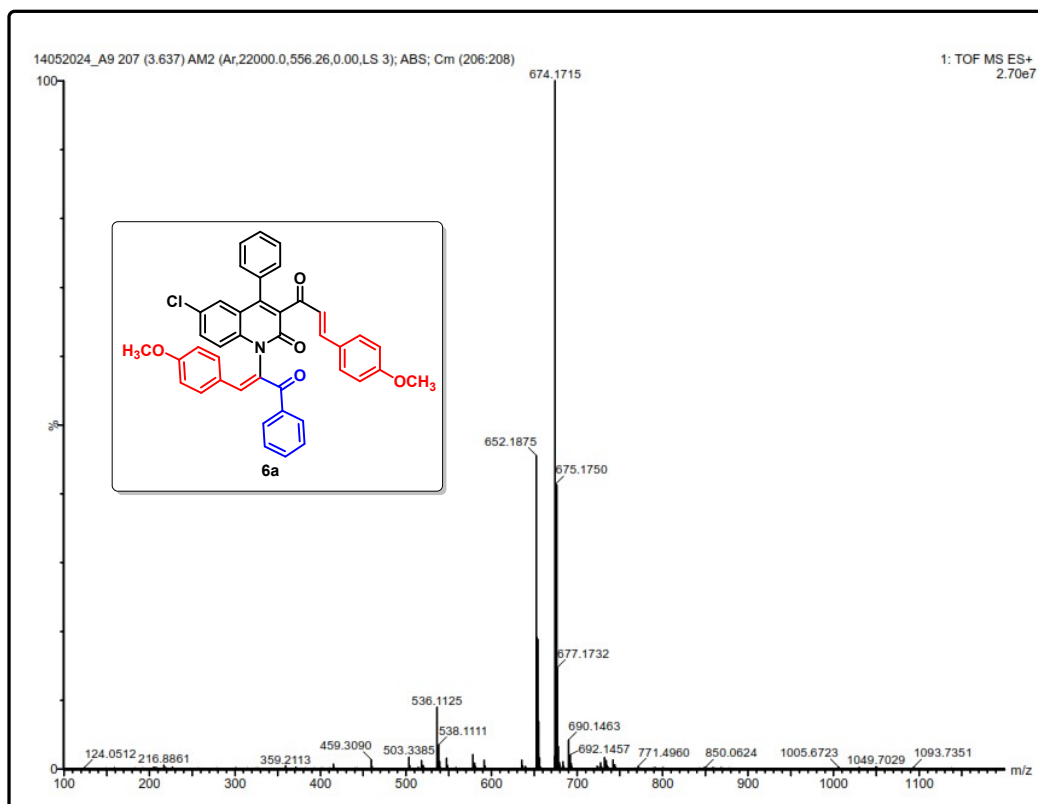

IR and HRMS spectra of compound **6a**



Signature SIF VIT VELLORE  
PB4CL40

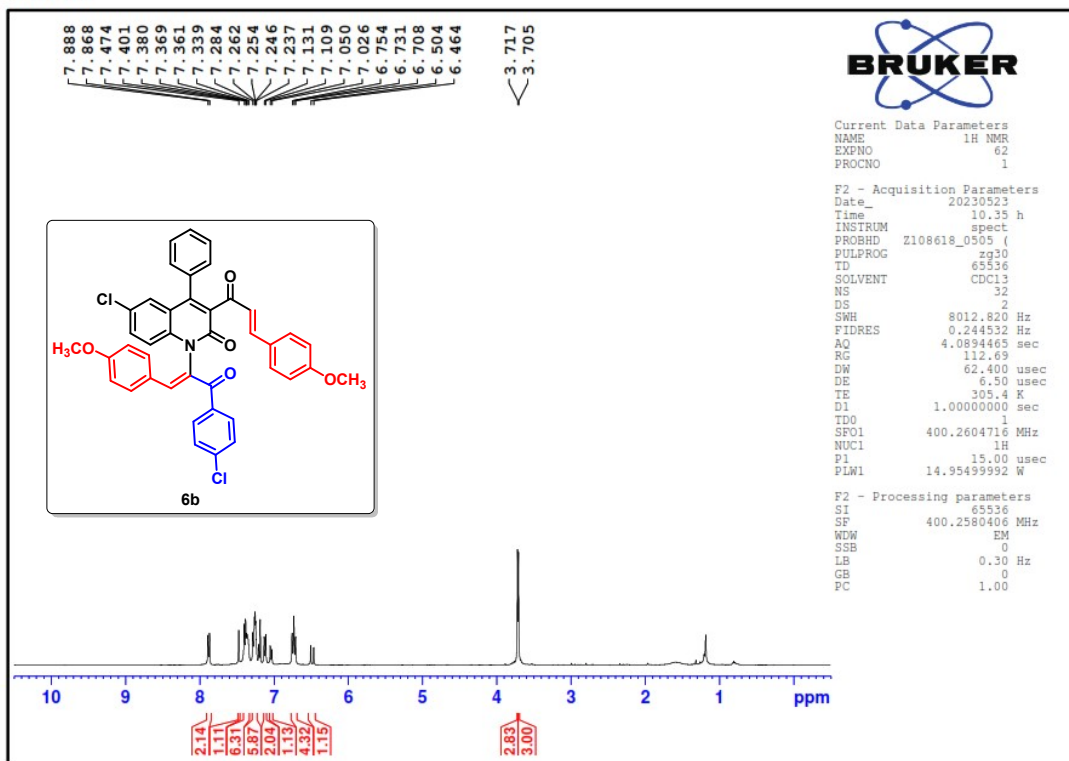

Signature SIF VIT VELLORE  
PB4CL40

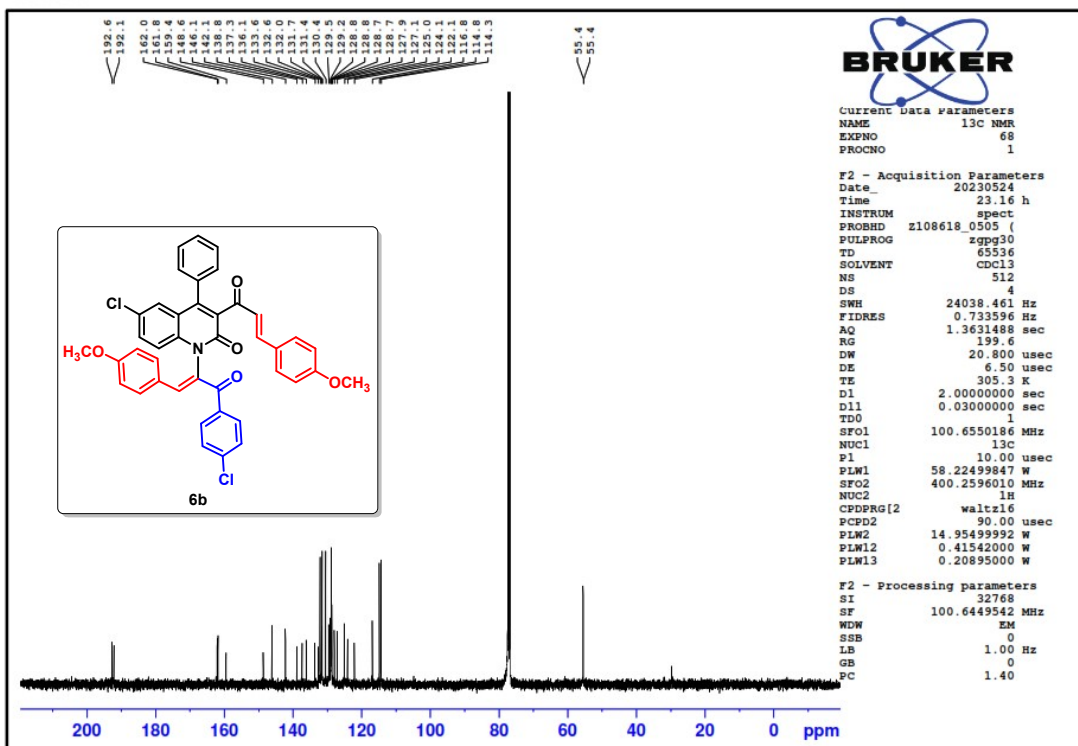

$^1\text{H}$  and  $^{13}\text{C}$  NMR spectra of compound **6b** in  $\text{CDCl}_3$

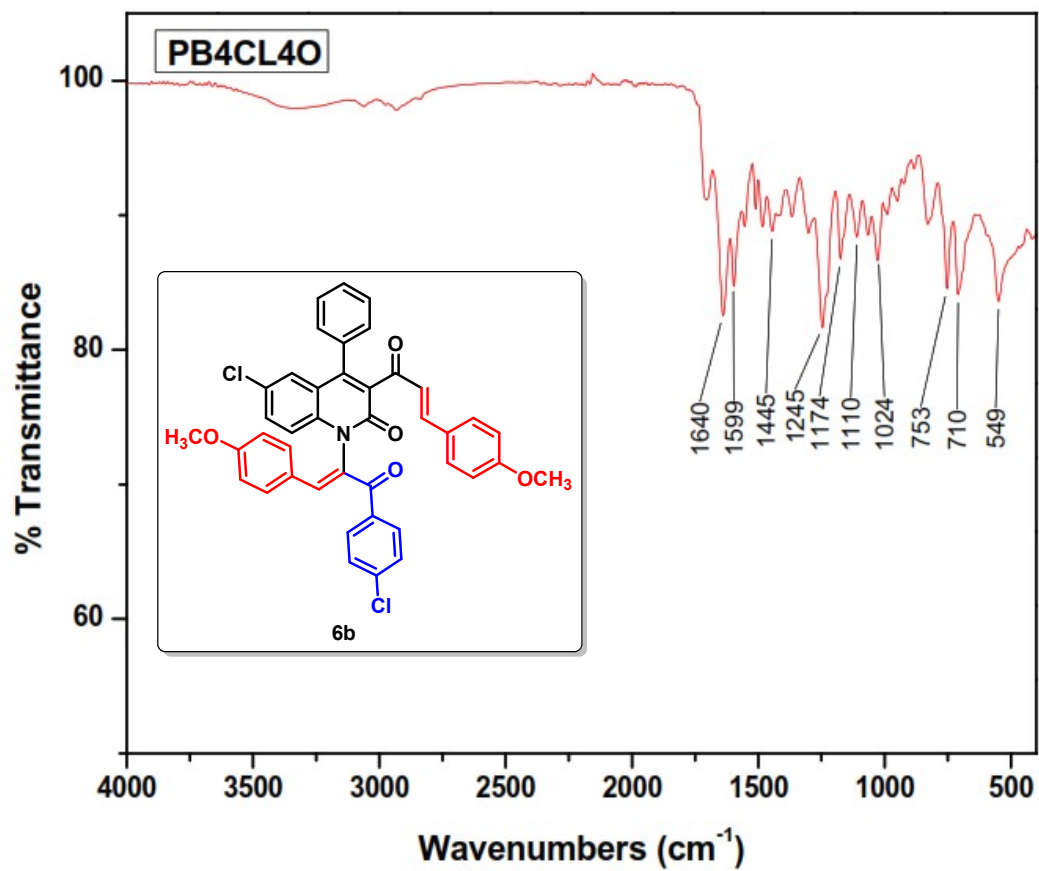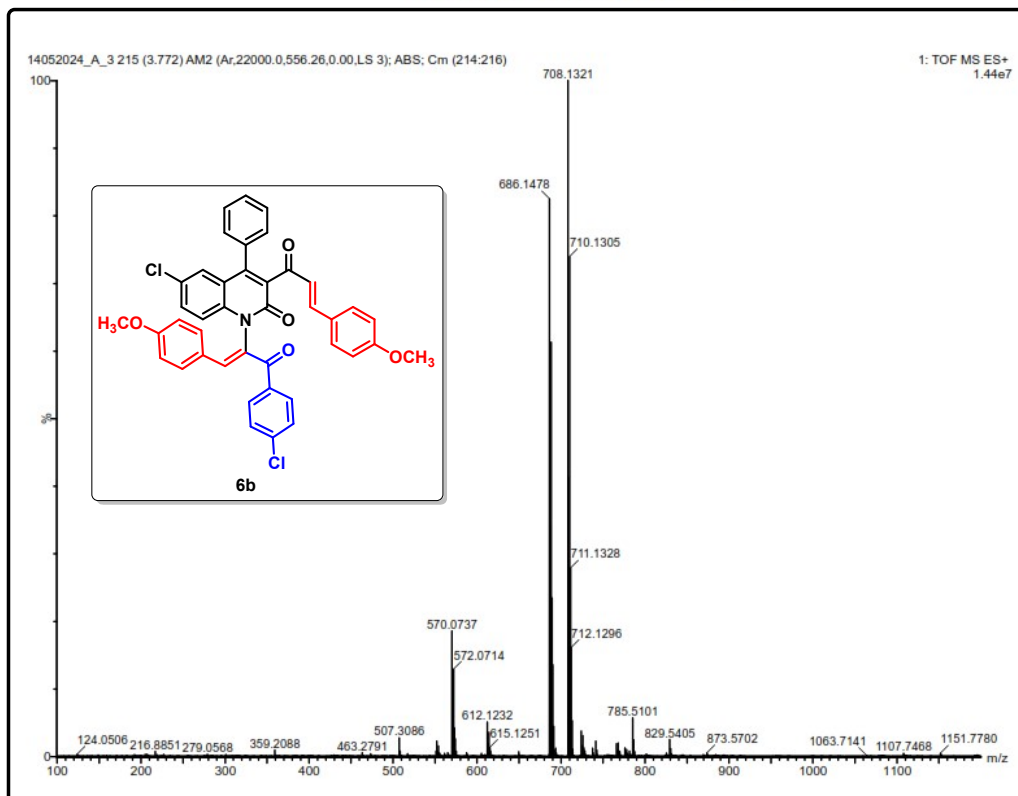

IR and HRMS spectra of compound **6b**

Signature SIF VIT VELLORE  
PB30

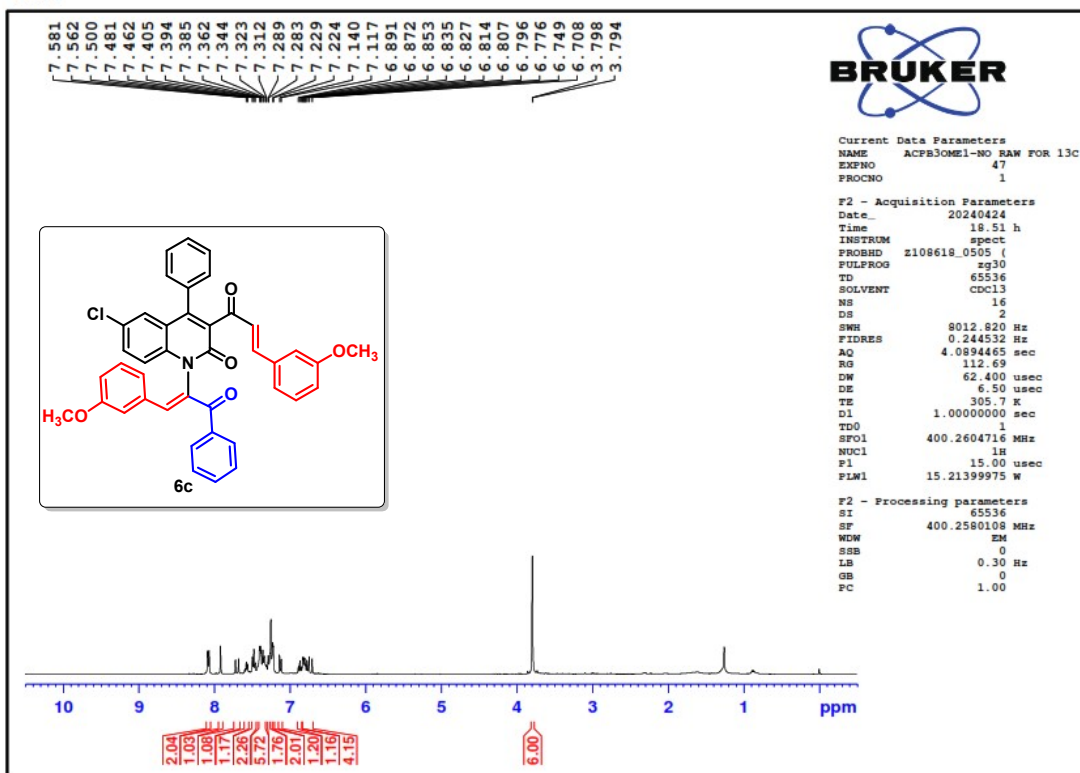

Signature SIF VIT VELLORE  
PB30

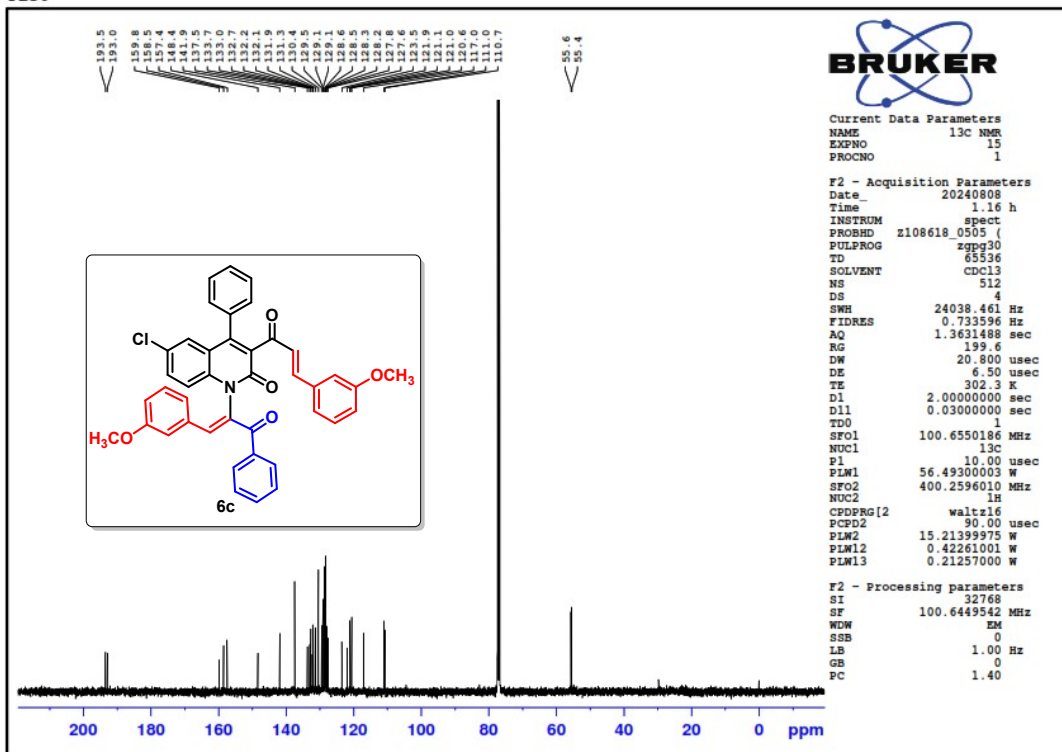

$^1\text{H}$  and  $^{13}\text{C}$  NMR spectra of compound **6c** in  $\text{CDCl}_3$

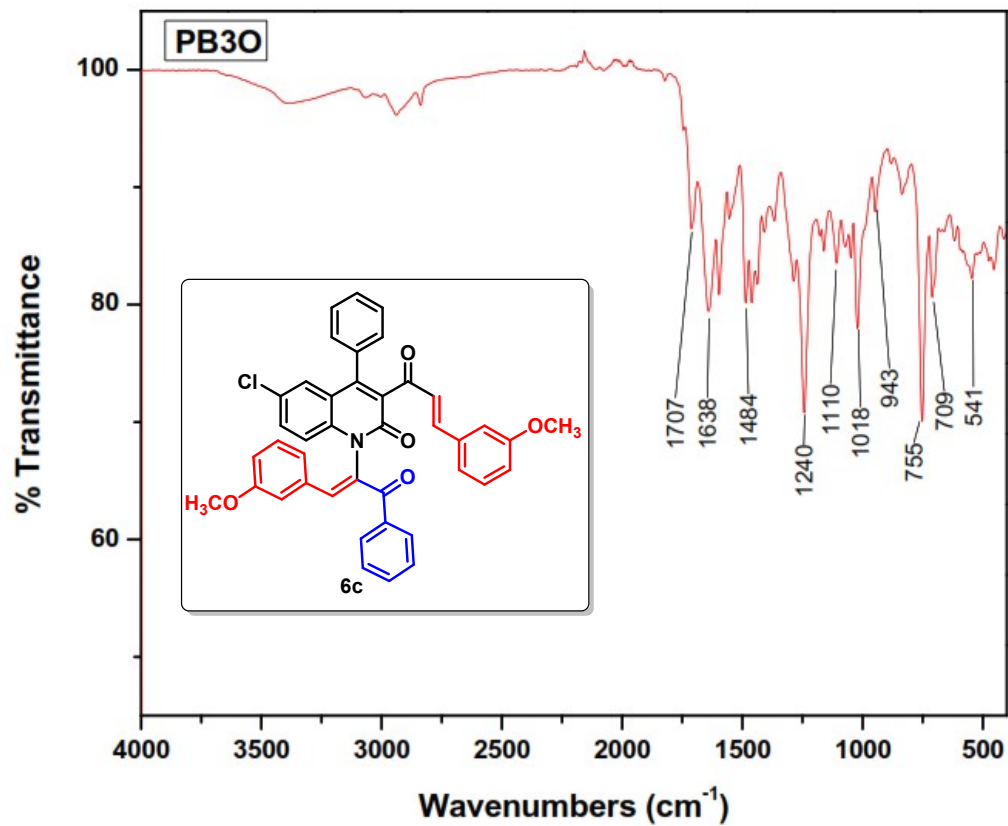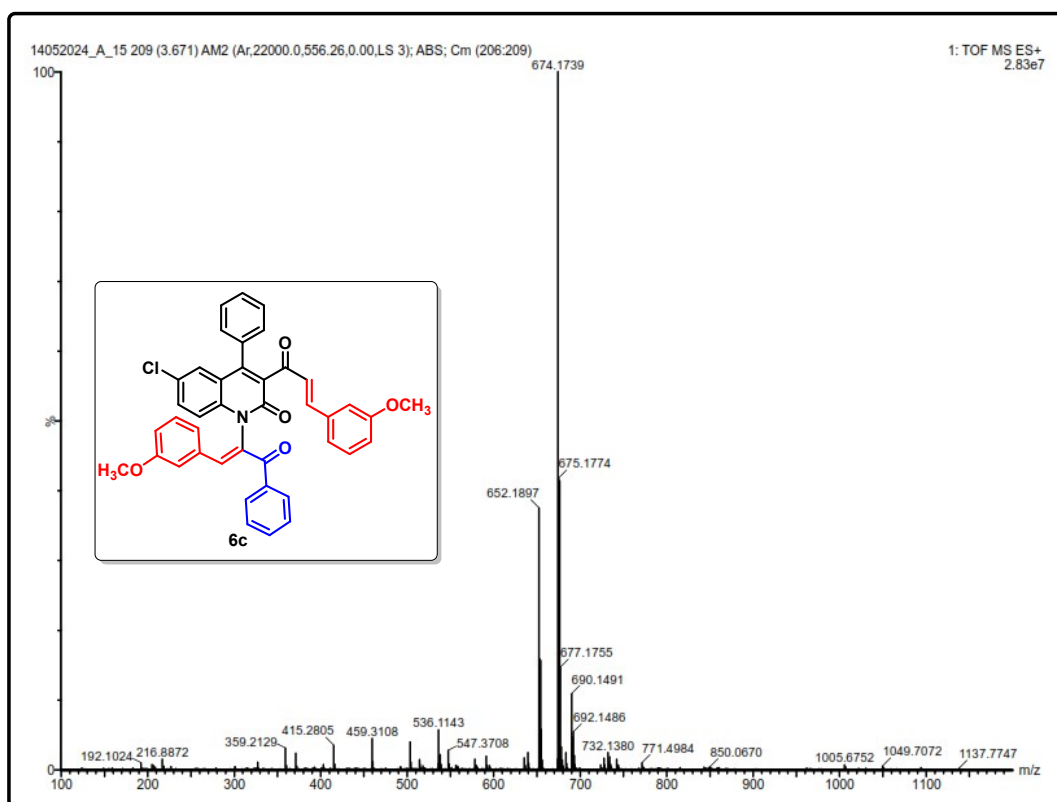

IR and HRMS spectra of compound **6c**

Signature SIF VIT VELLORE  
4CLPB30

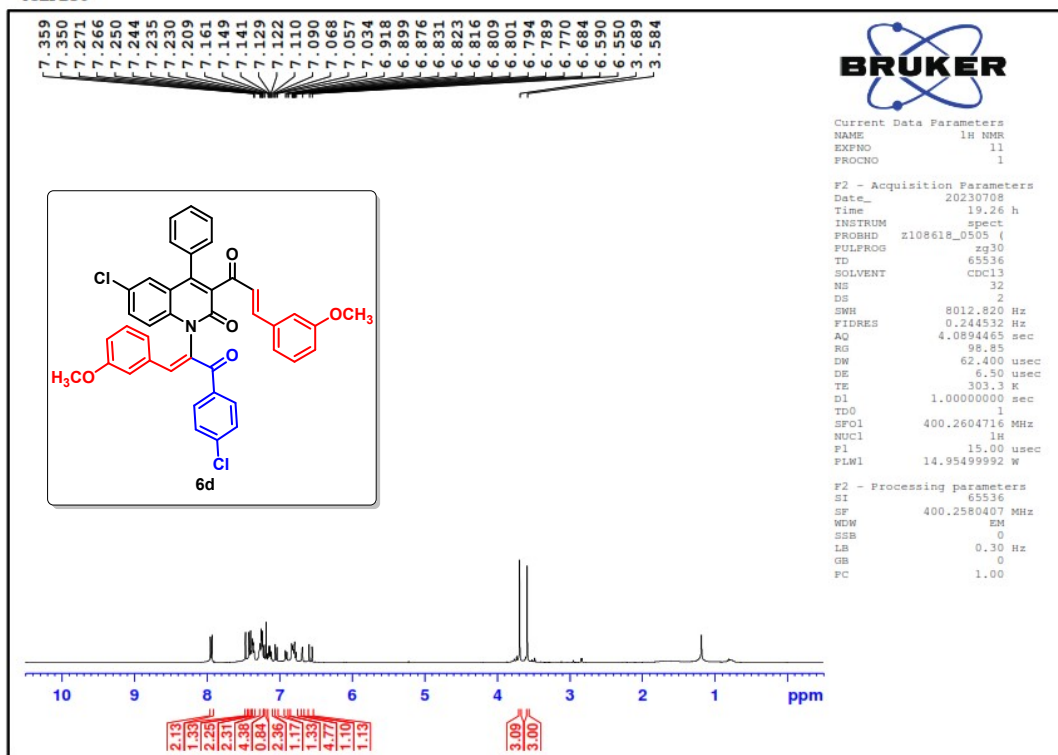

Signature SIF VIT VELLORE  
4CLPB30

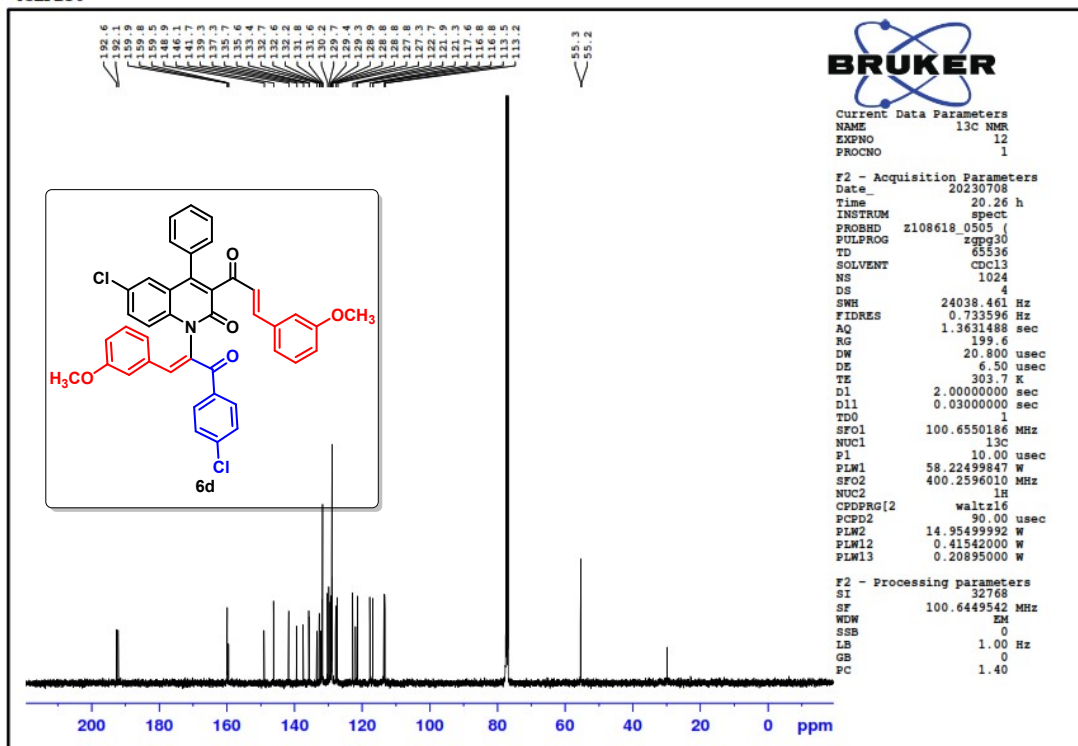

<sup>1</sup>H and <sup>13</sup>C NMR spectra of compound 6d in CDCl<sub>3</sub>

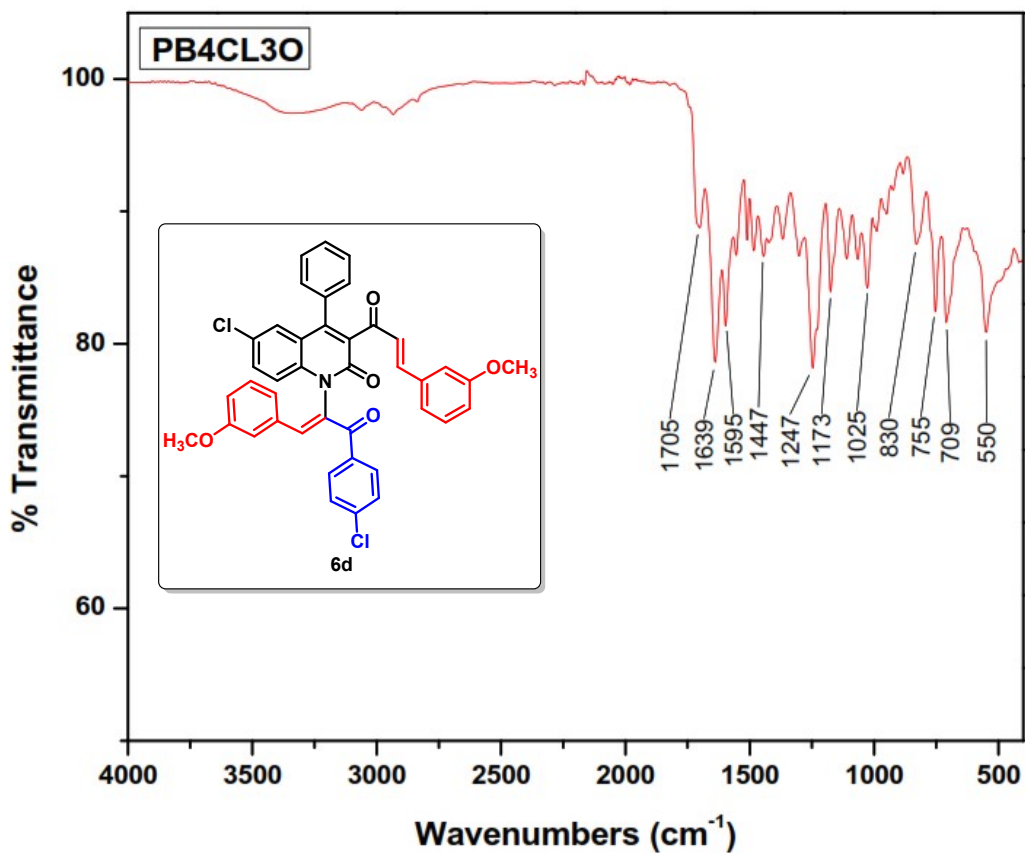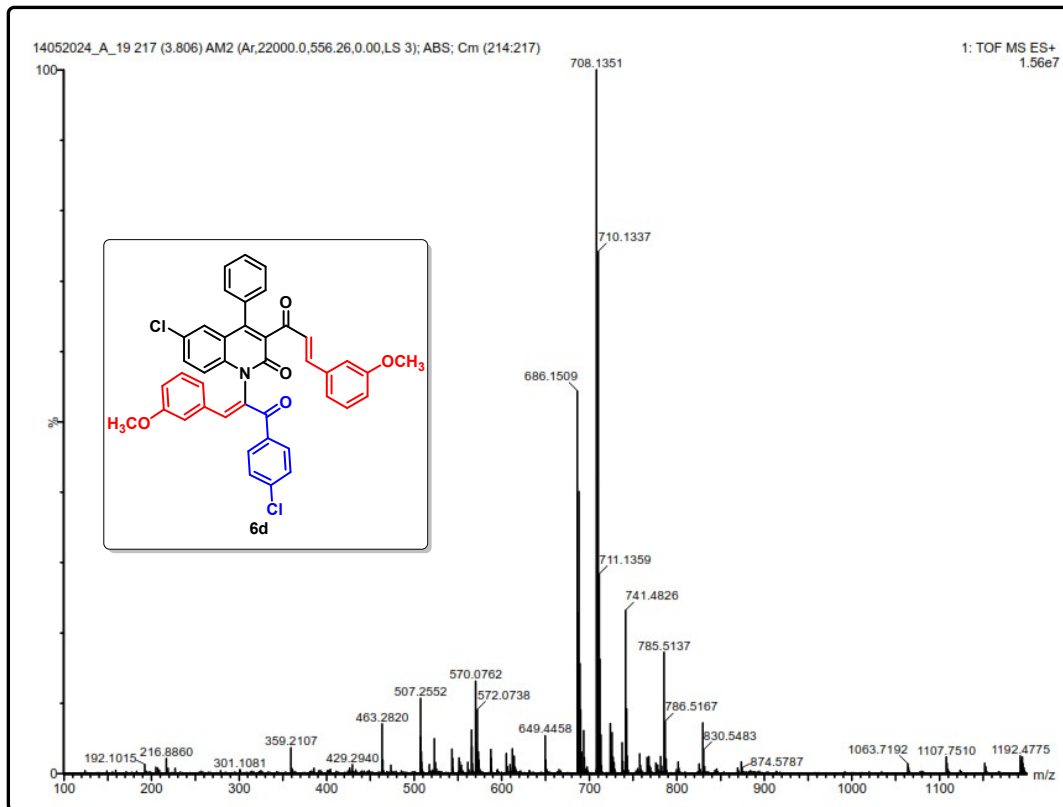

IR and HRMS spectra of compound **6d**

Signature SIF VIT VELLORE  
PB340Me

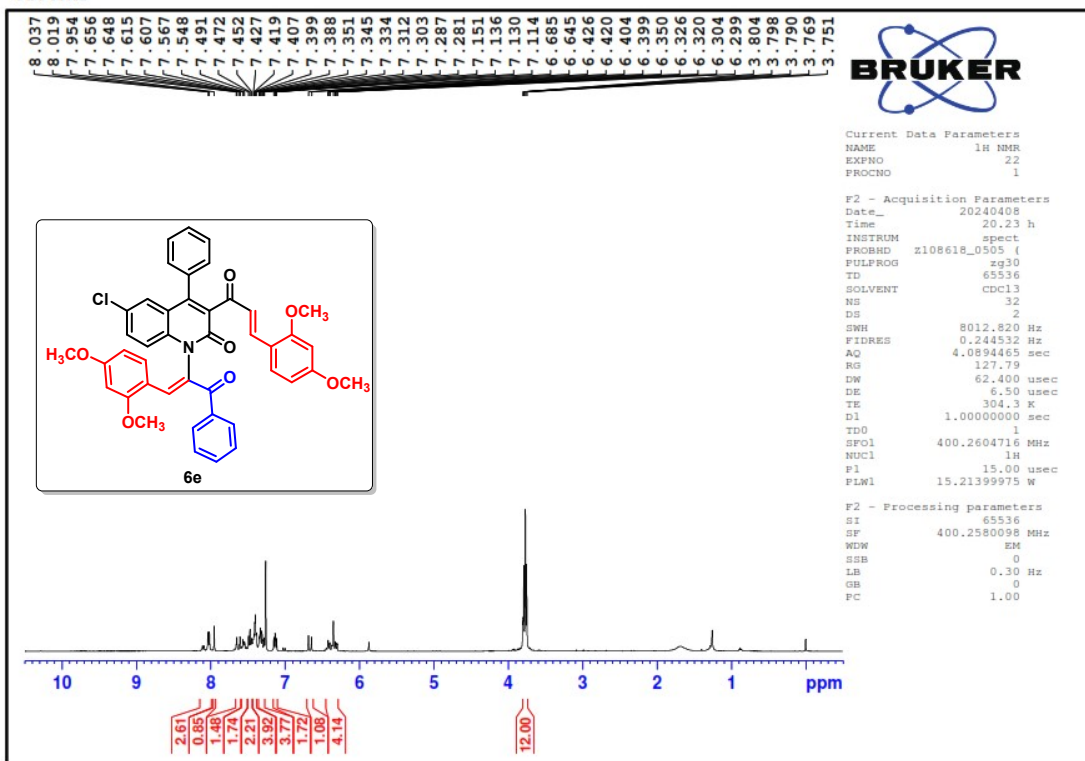

Signature SIF VIT VELLORE  
PB340Me

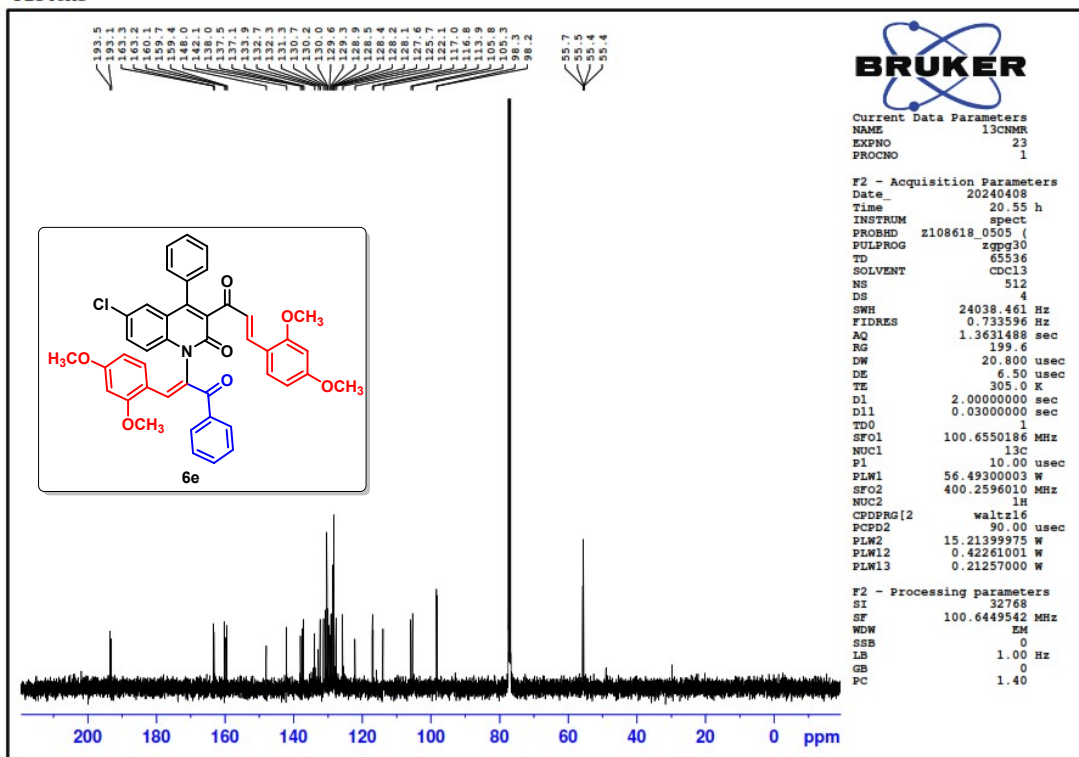

<sup>1</sup>H and <sup>13</sup>C NMR spectra of compound 6e in CDCl<sub>3</sub>

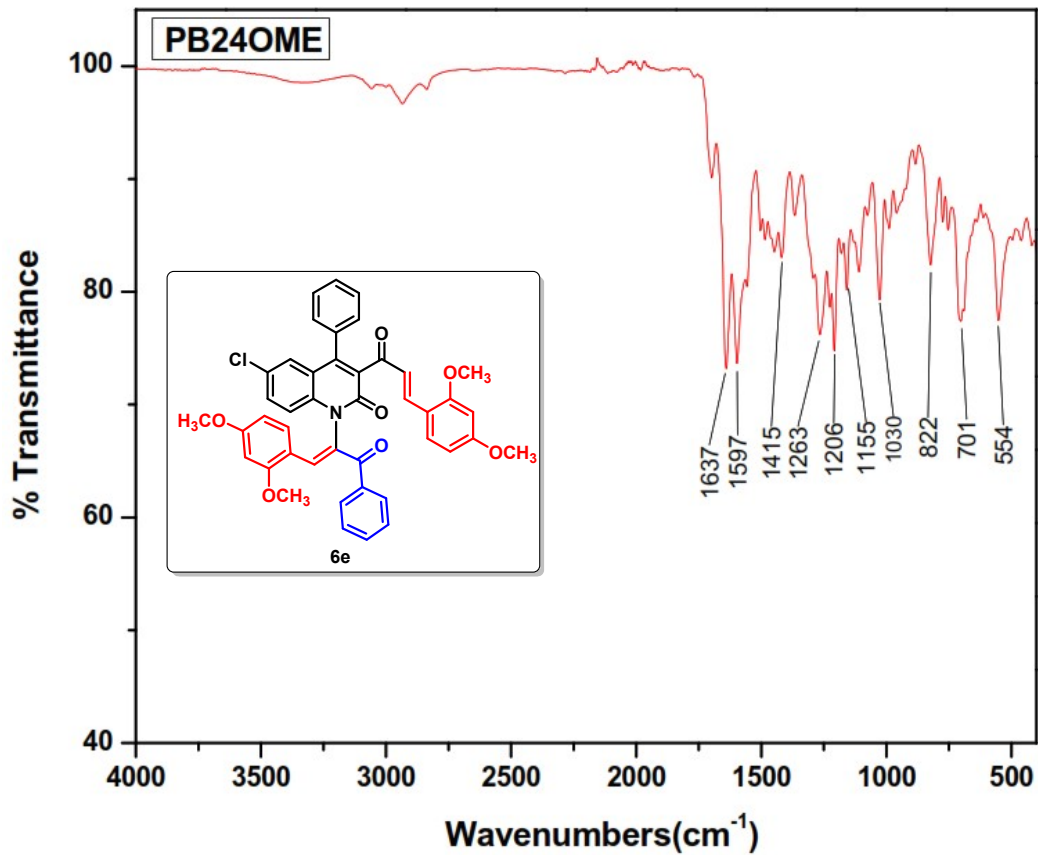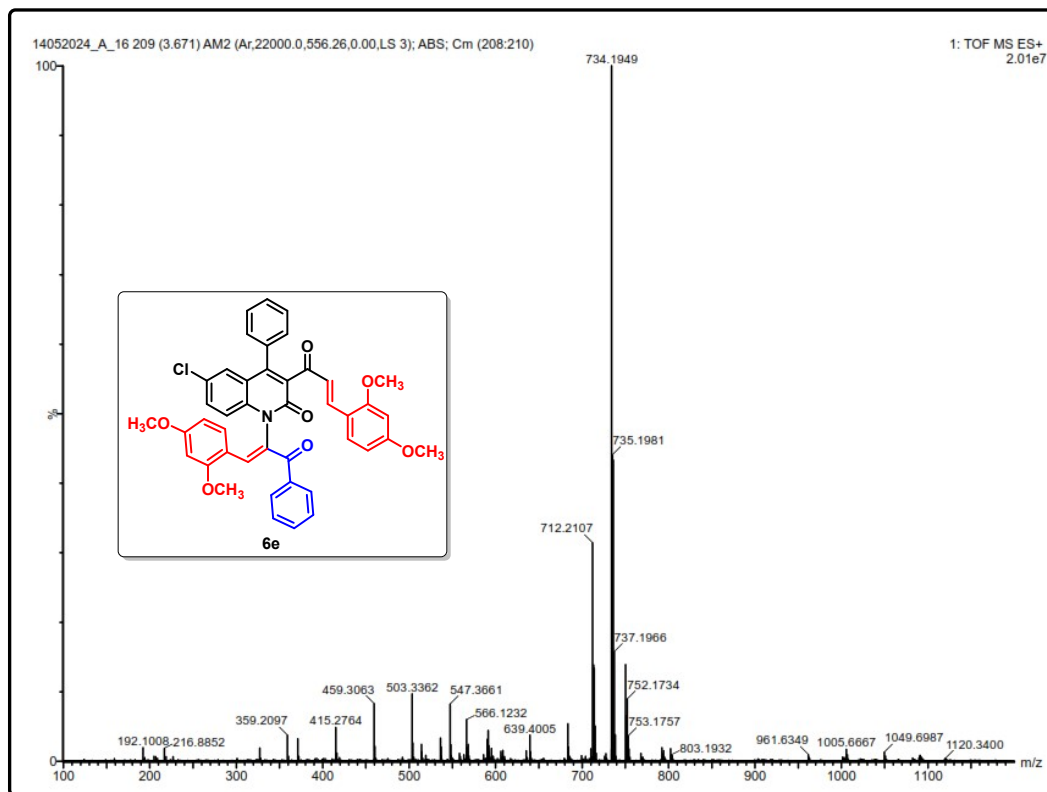

IR and HRMS spectra of compound **6e**



Signature SIF VIT VELLORE  
4CLPB240

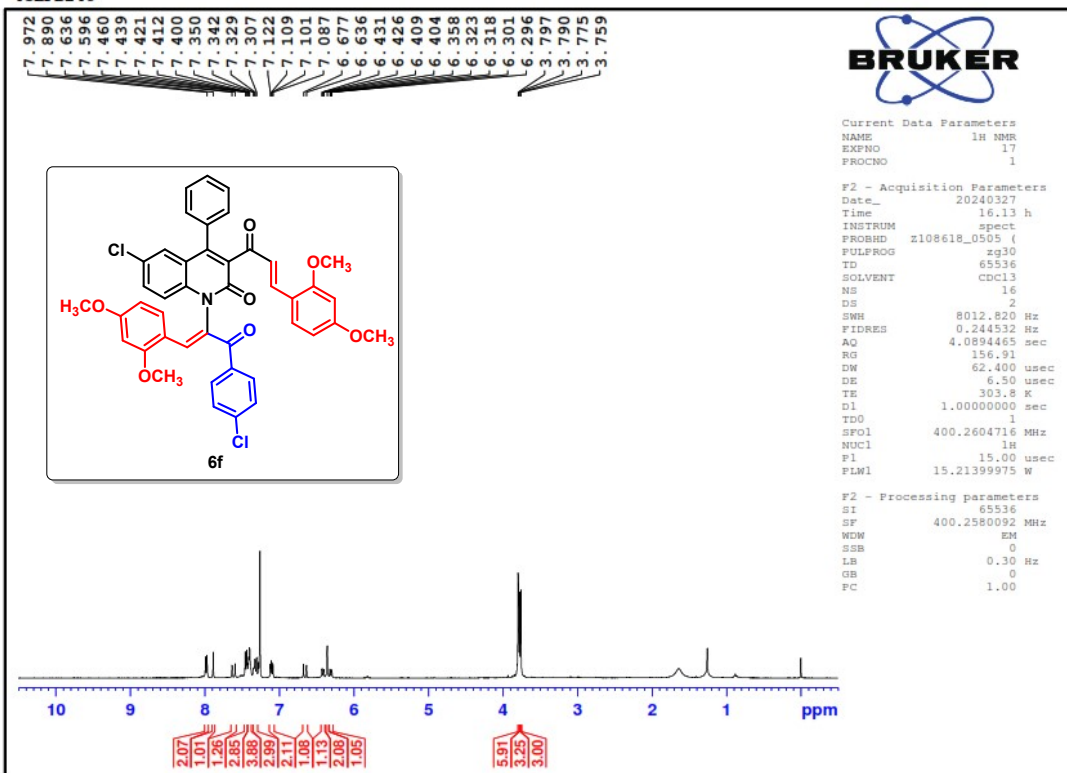

Signature SIF VIT VELLORE  
4CLPB34

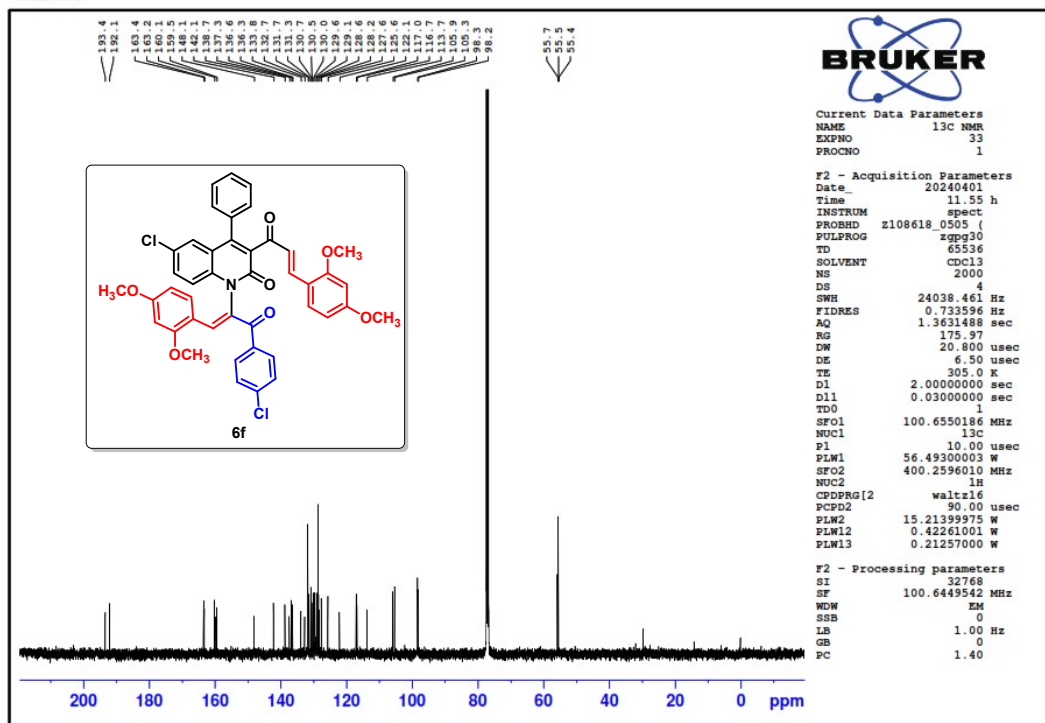

<sup>1</sup>H and <sup>13</sup>C NMR spectra of compound **6f** in CDCl<sub>3</sub>

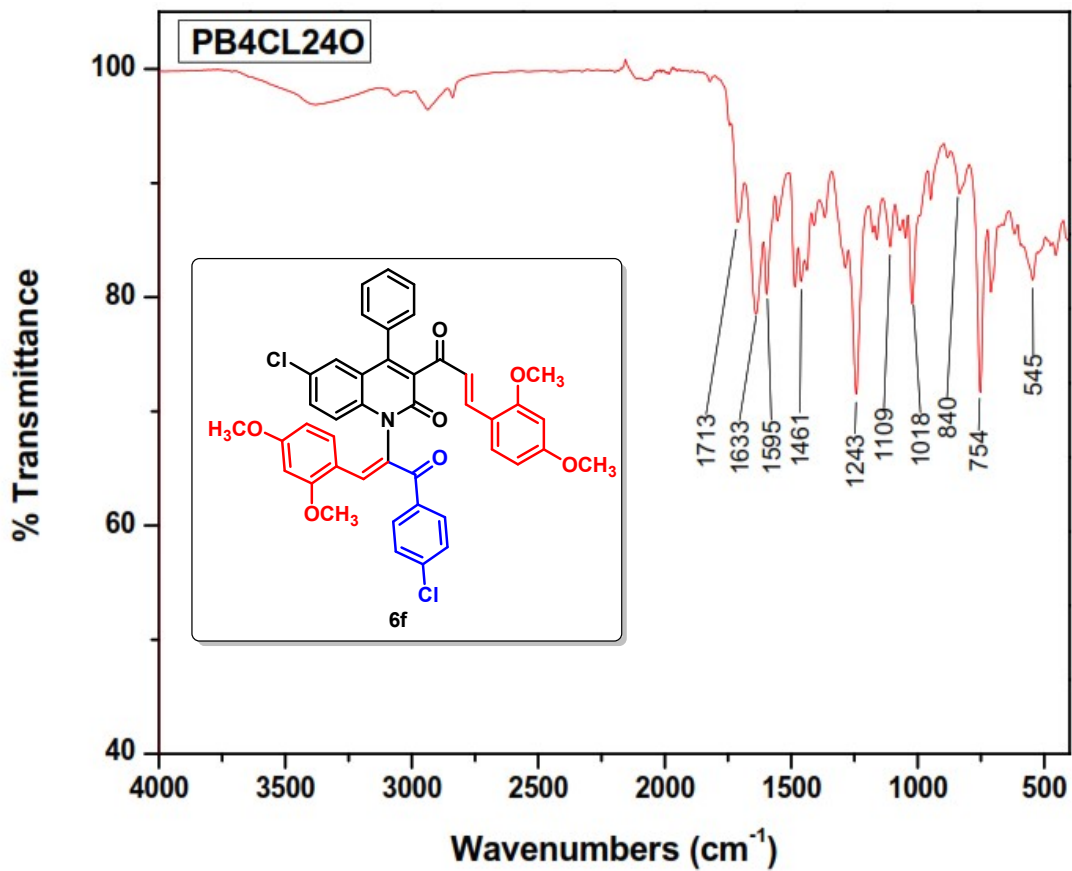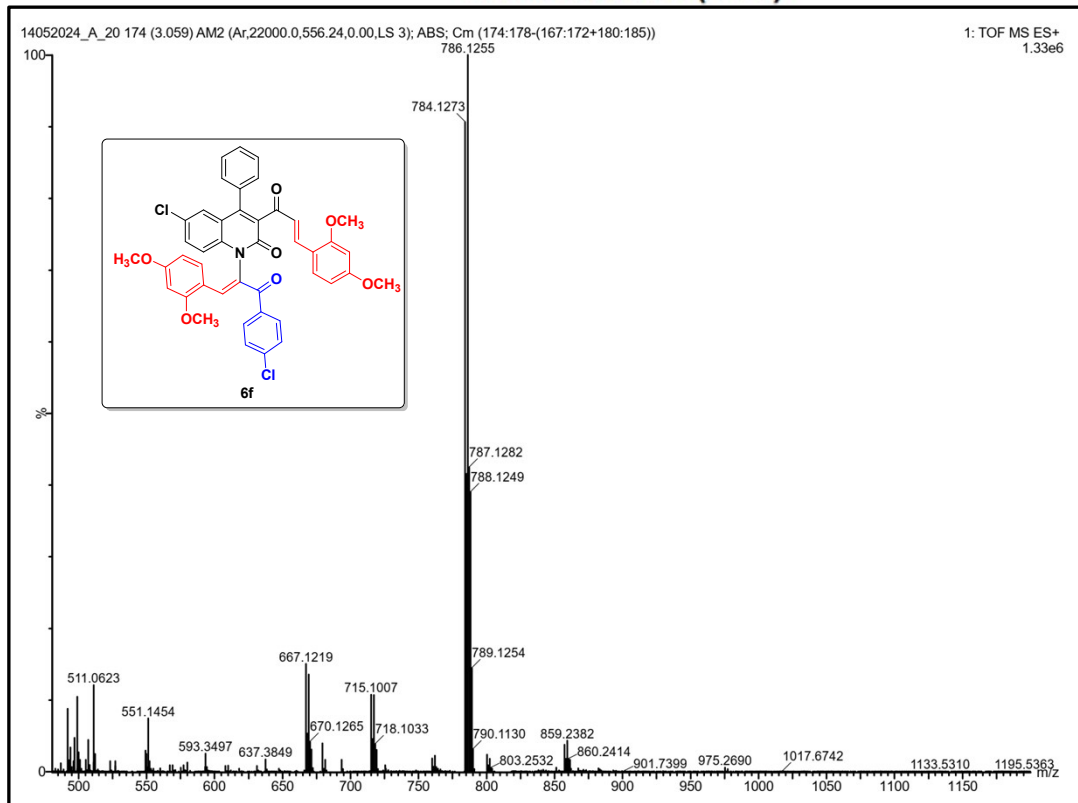

IR and HRMS spectra of compound **6f**

Signature SIF VIT VELLORE  
PB340

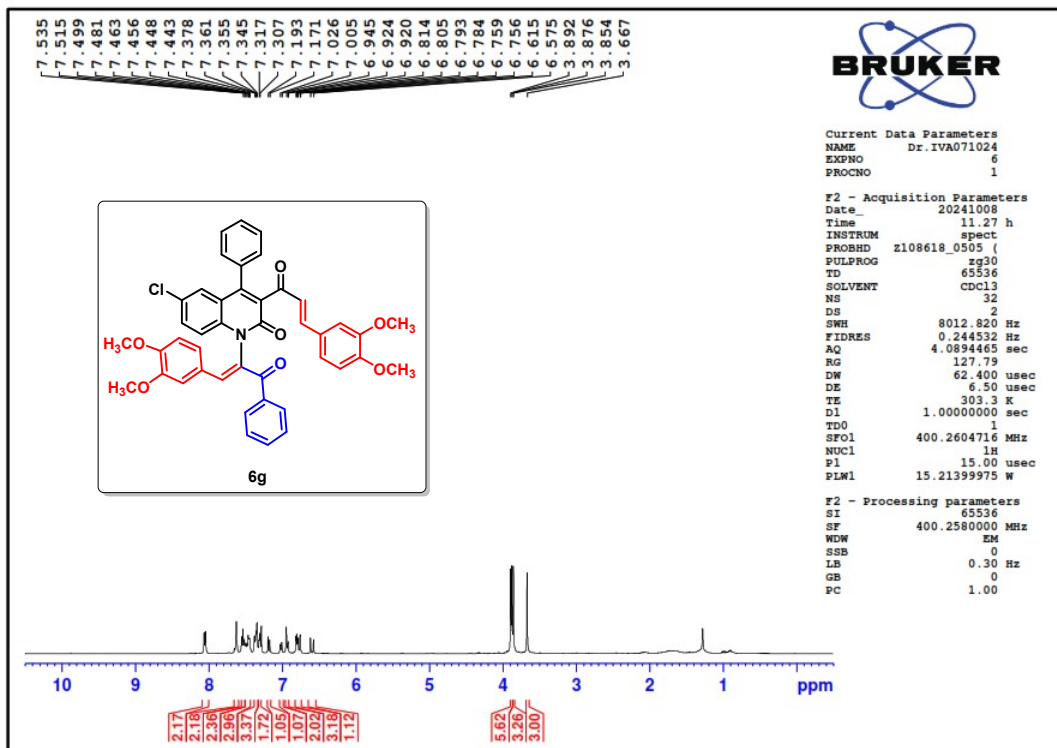

Signature SIF VIT VELLORE  
PB340

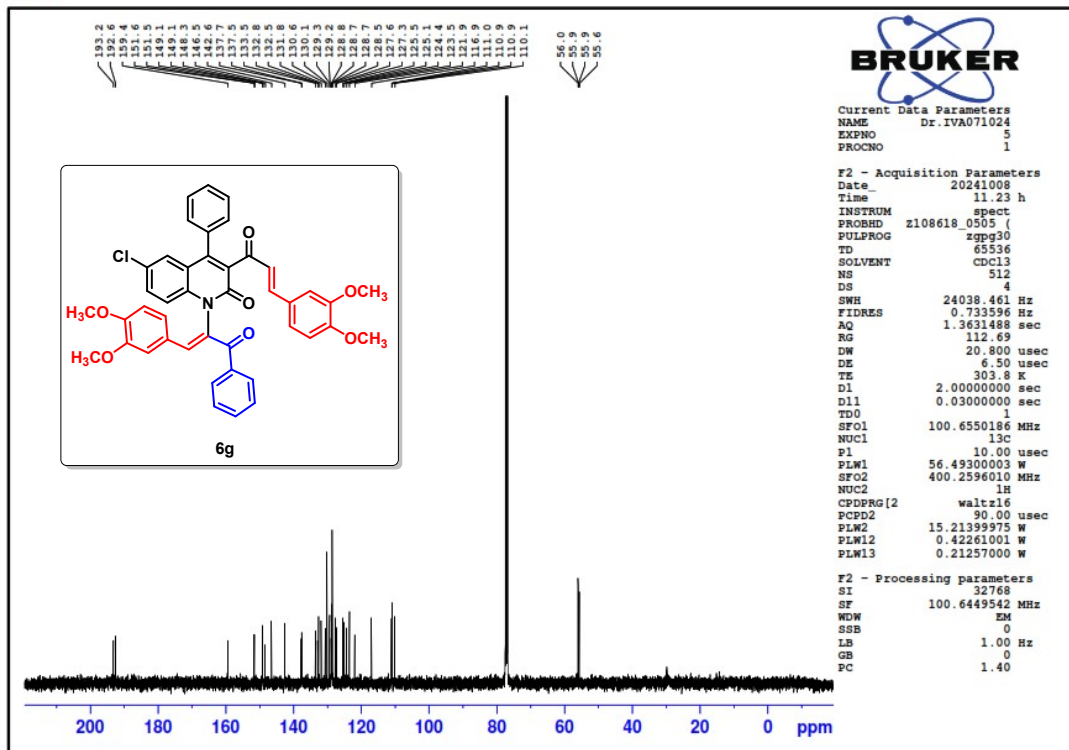

$^1\text{H}$  and  $^{13}\text{C}$  NMR spectra of compound **6g** in  $\text{CDCl}_3$

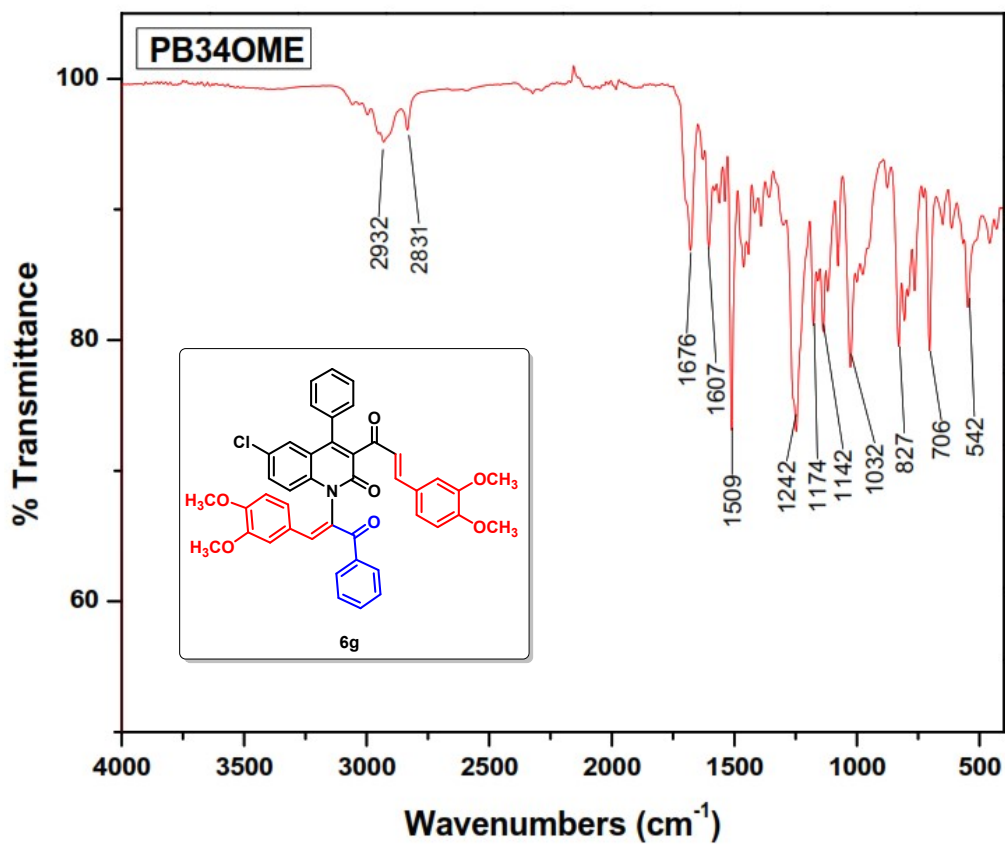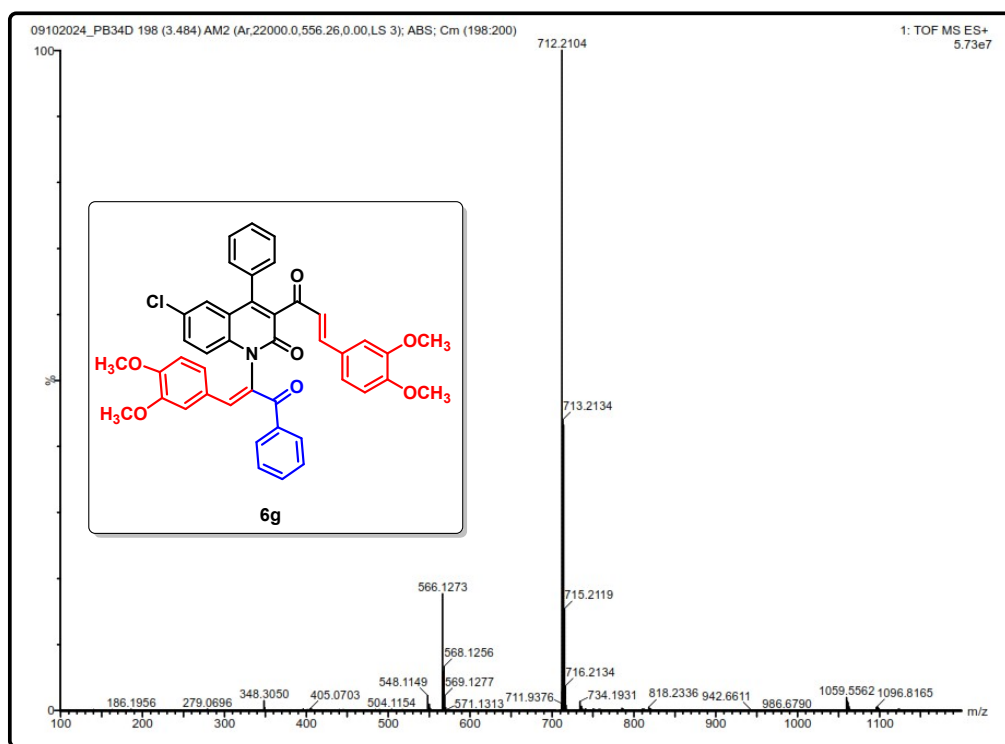

IR and HRMS spectra of compound **6g**

Signature SIF VIT VELLORE  
PB4CLPT

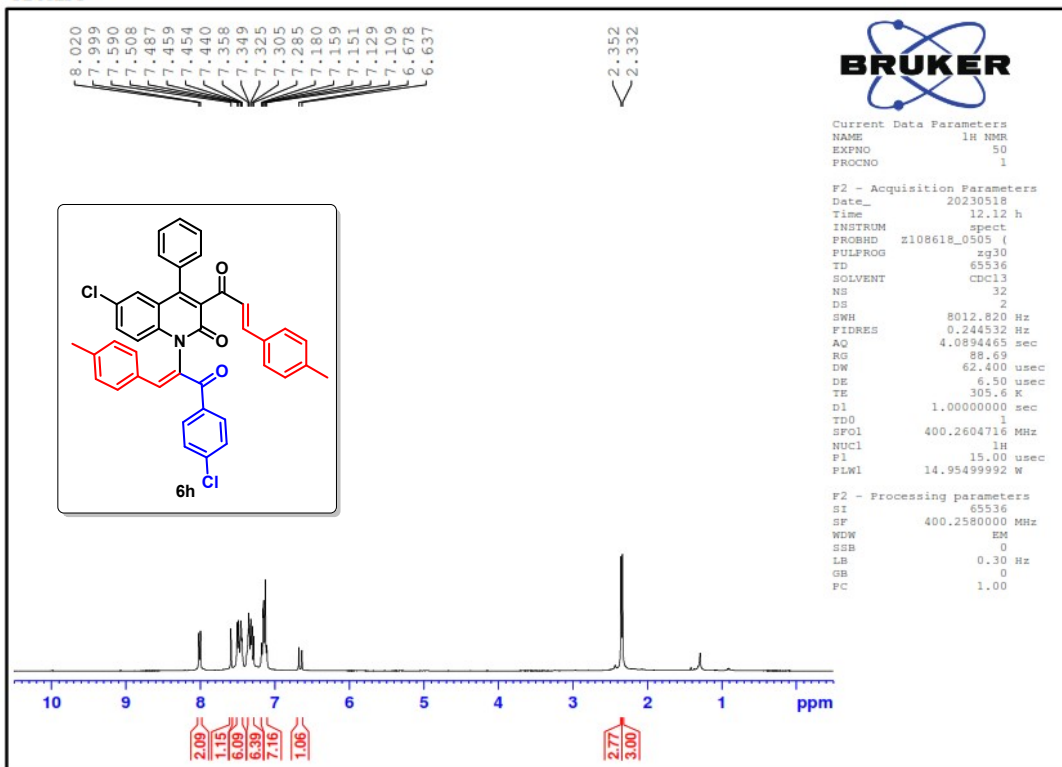

Signature SIF VIT VELLORE  
PB4CLPT

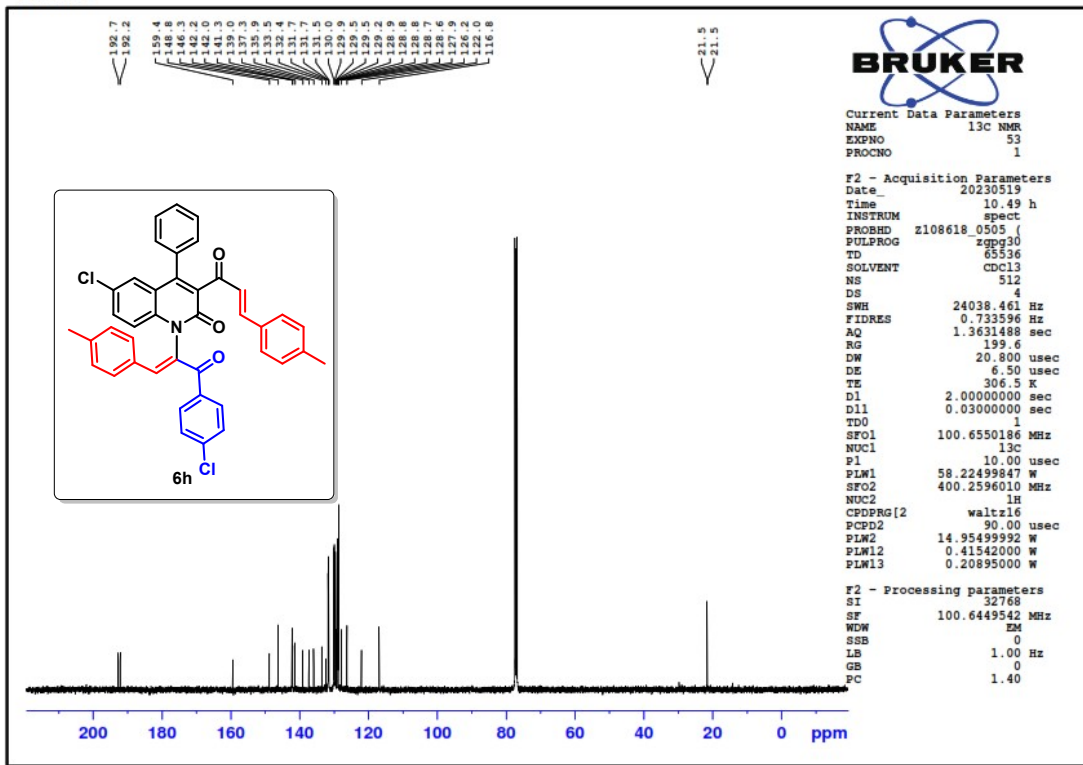

<sup>1</sup>H and <sup>13</sup>C NMR spectra of compound **6h** in CDCl<sub>3</sub>

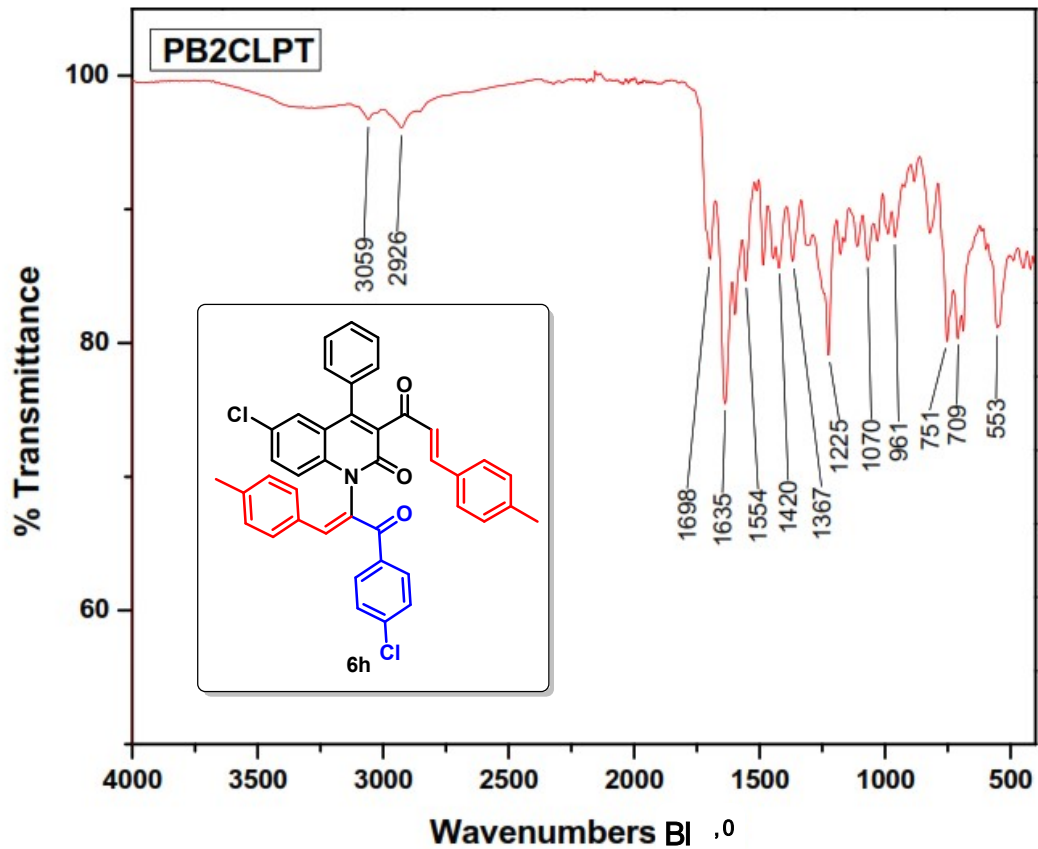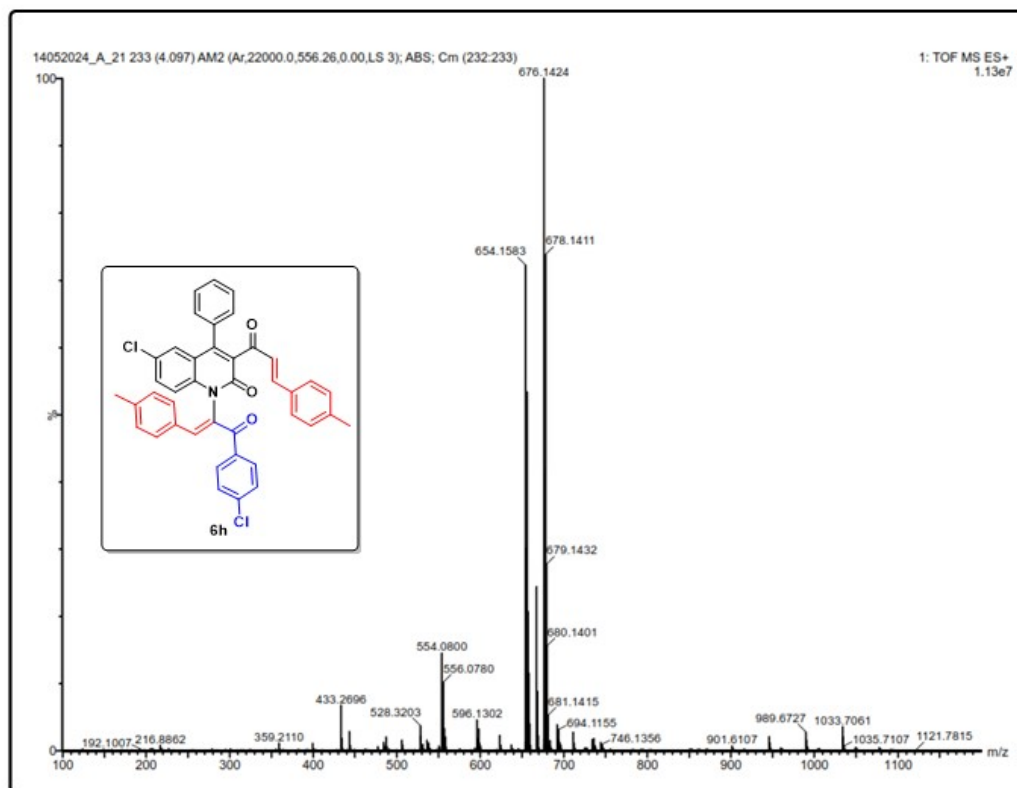

IR and HRMS spectra of compound **6h**

Signature SIF VIT VELLORE  
PB2OEt

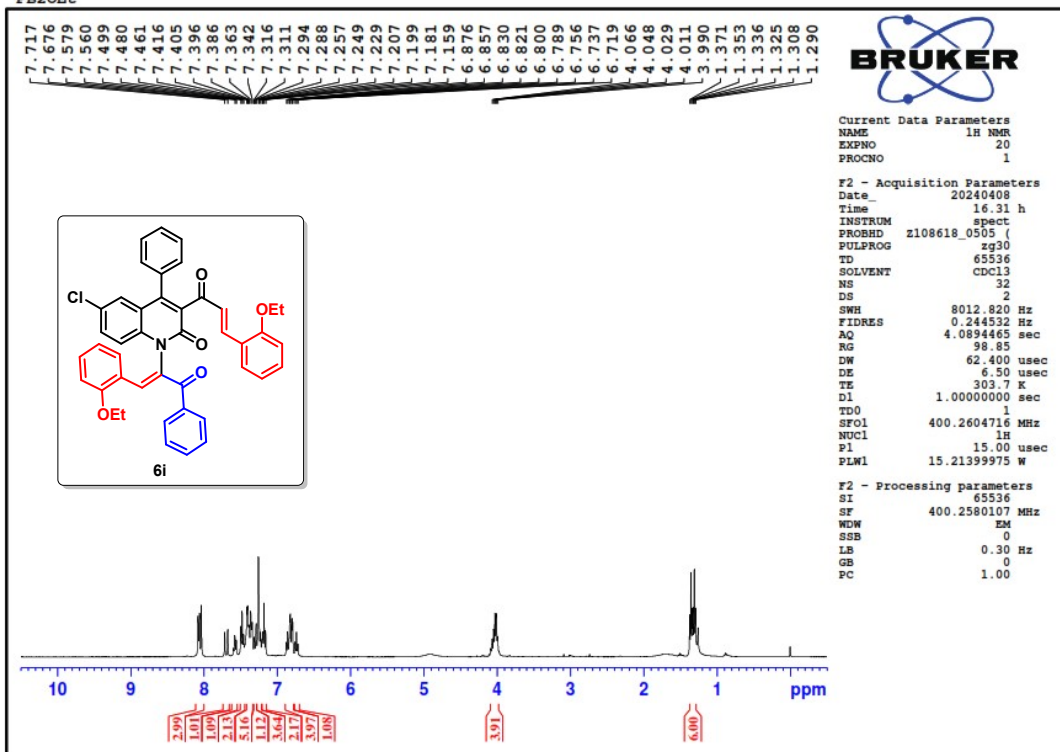

Signature SIF VIT VELLORE  
PB2OEt

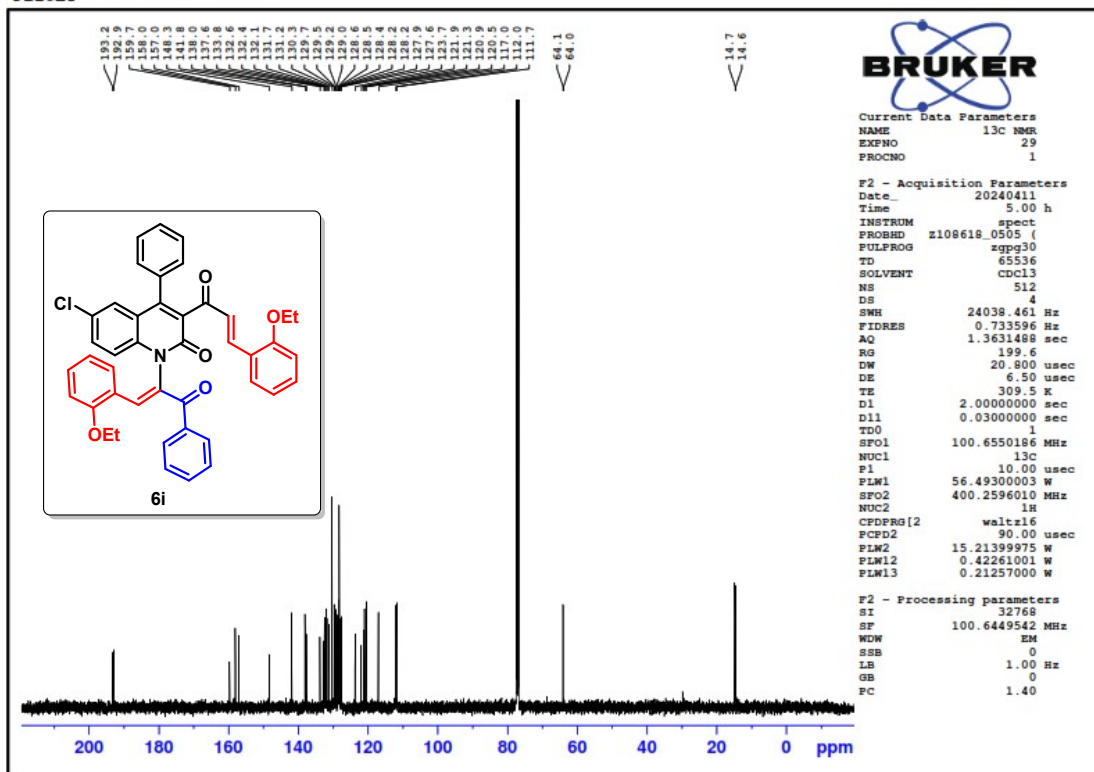

H and <sup>13</sup>C NMR spectra of compound **6i** in CDCl<sub>3</sub>

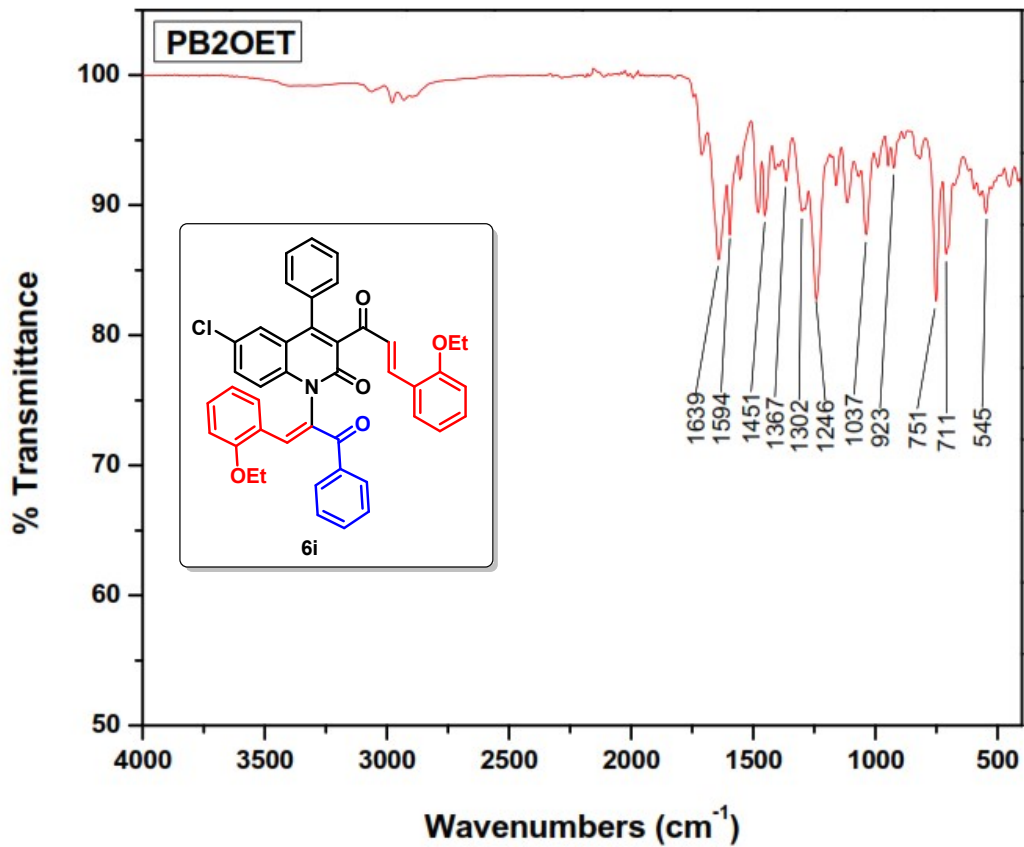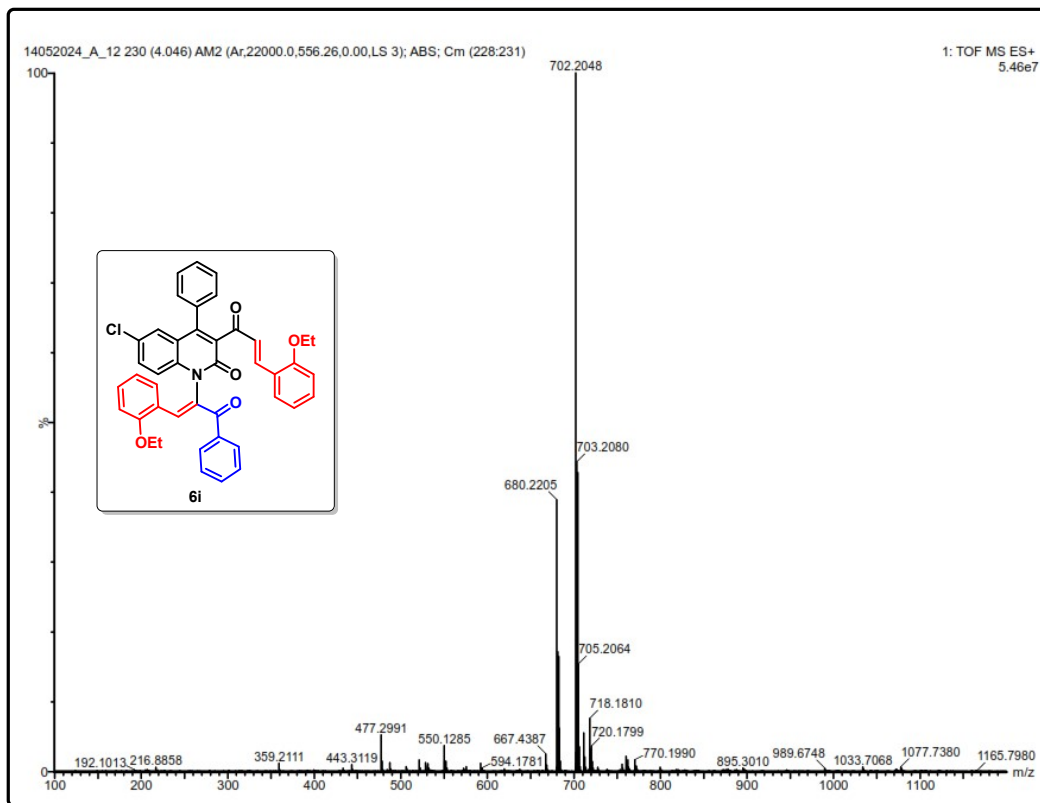

IR and HRMS spectra of compound **6i**



Signature SIF VIT VELLORE  
PBNME2

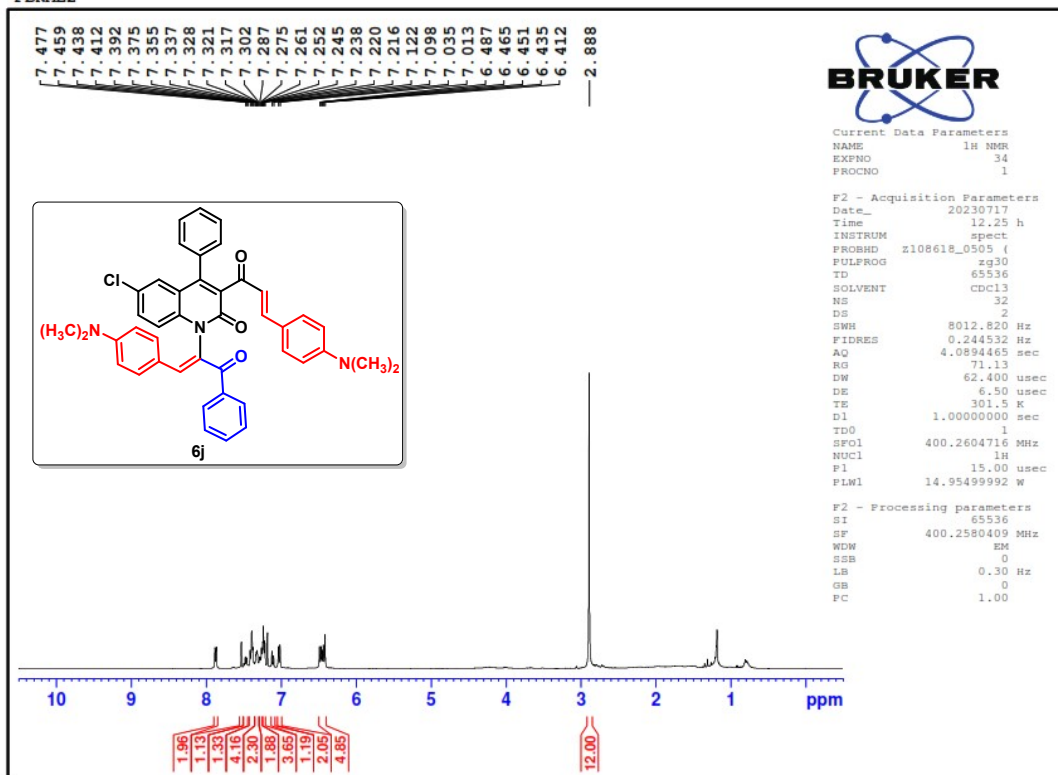

Signature SIF VIT VELLORE  
PBNME2

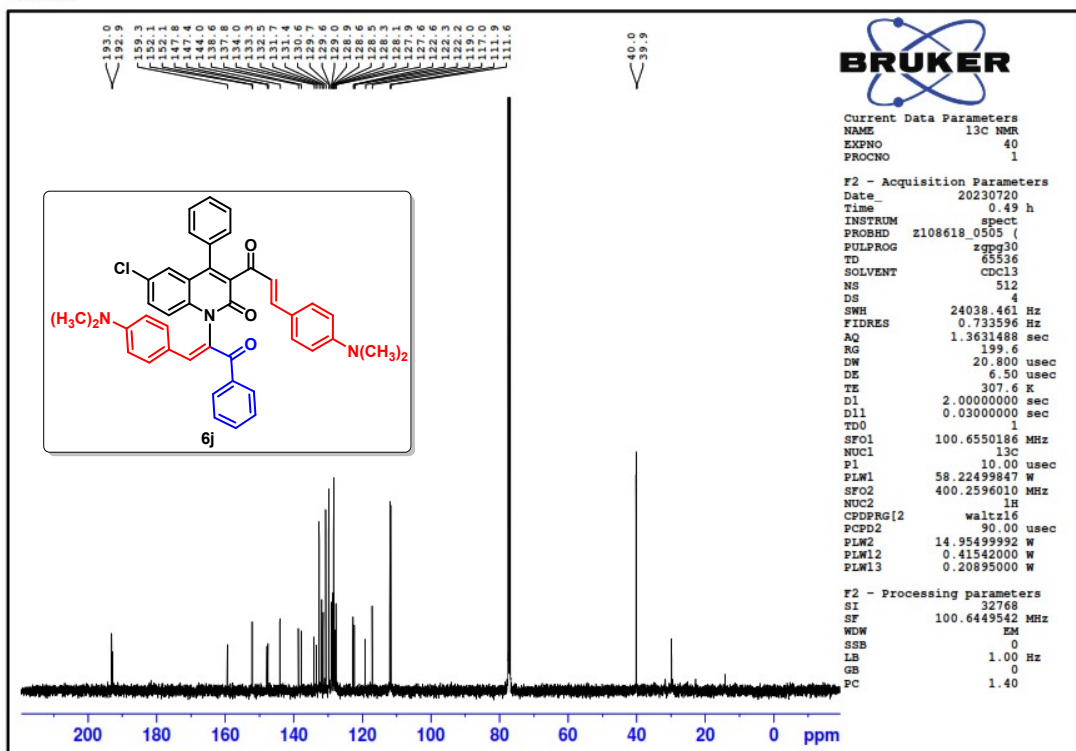

$^1\text{H}$  and  $^{13}\text{C}$  NMR spectra of compound **6j** in  $\text{CDCl}_3$

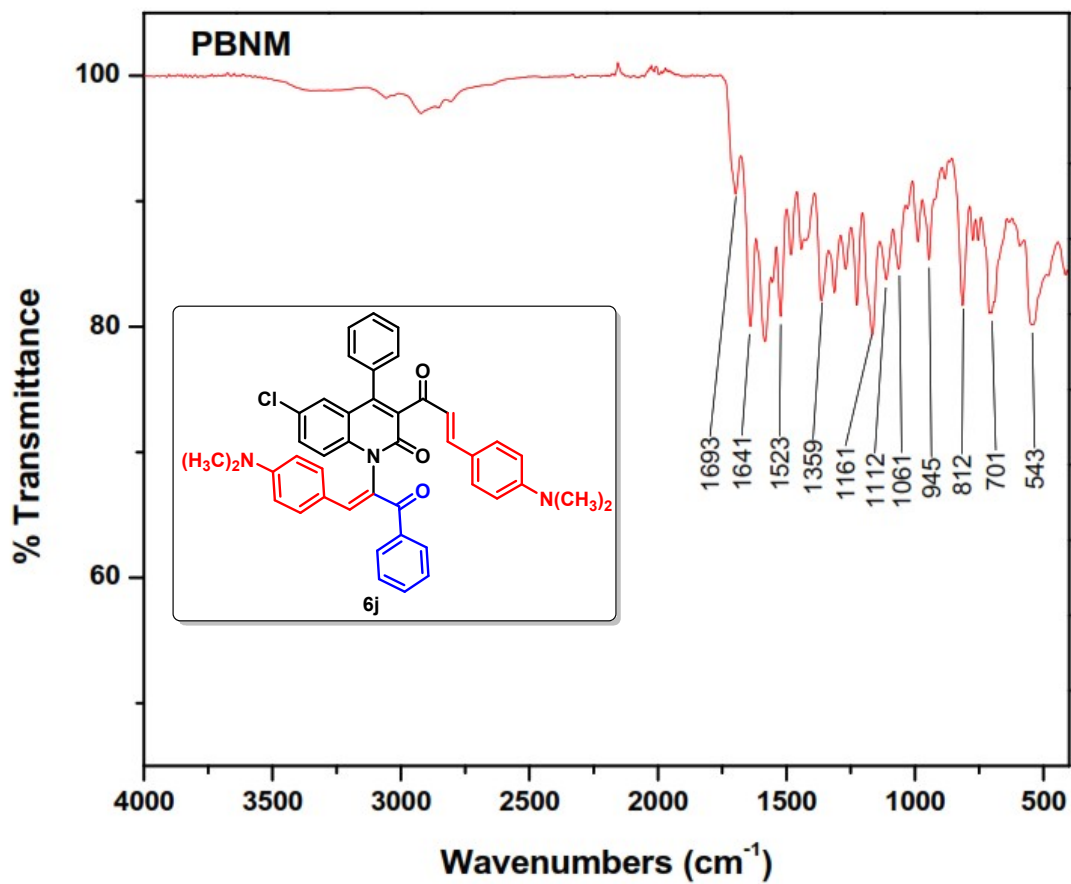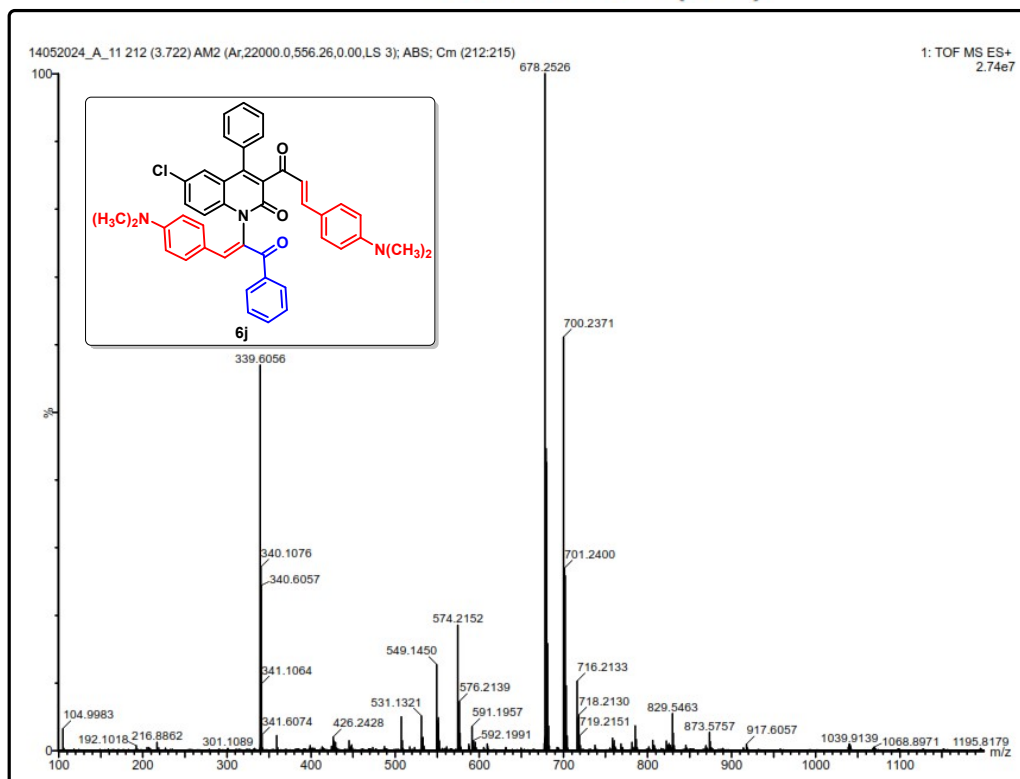

IR and HRMS spectra of compound **6j**

Signature SIF VIT VELLORE  
PB4BR1

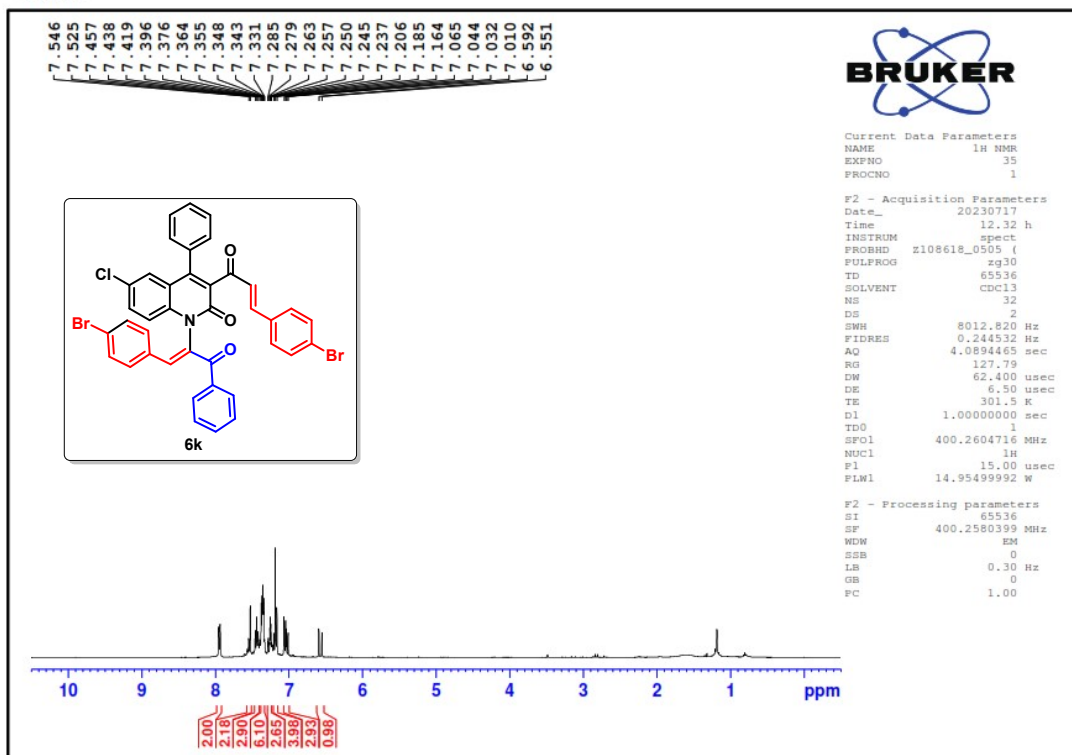

Signature SIF VIT VELLORE  
PB4BR1

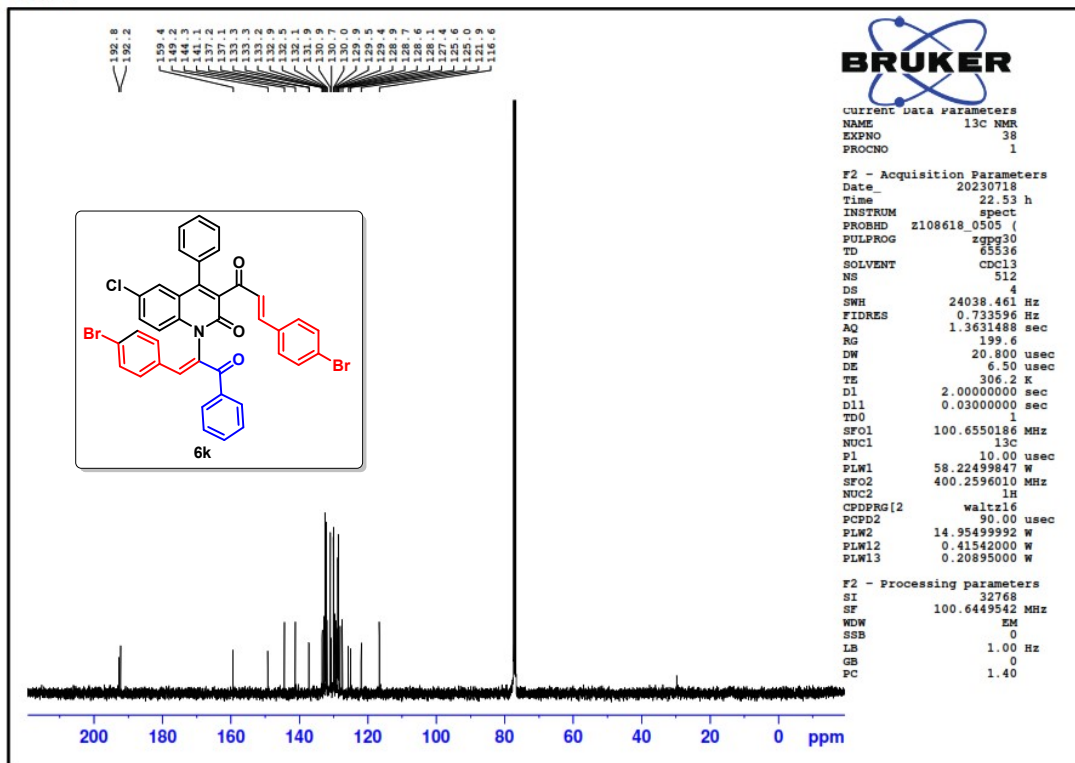

$^1\text{H}$  and  $^{13}\text{C}$  NMR spectra of compound **6k** in  $\text{CDCl}_3$

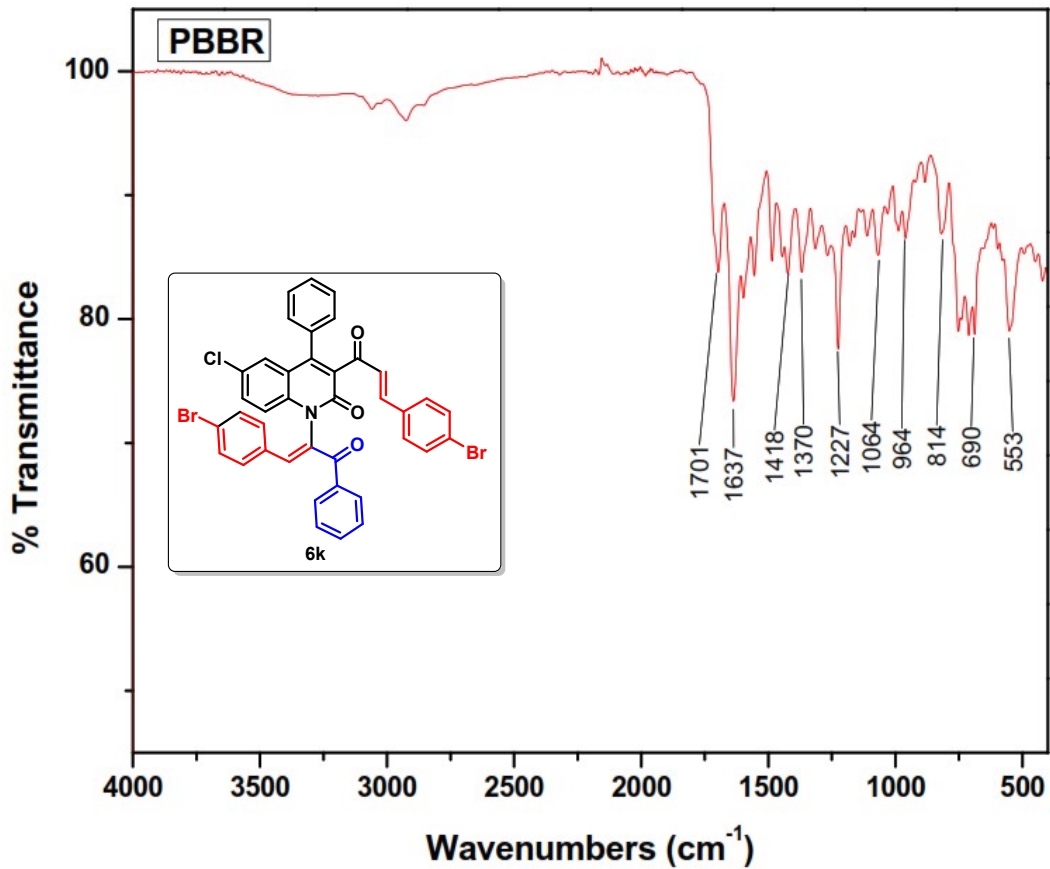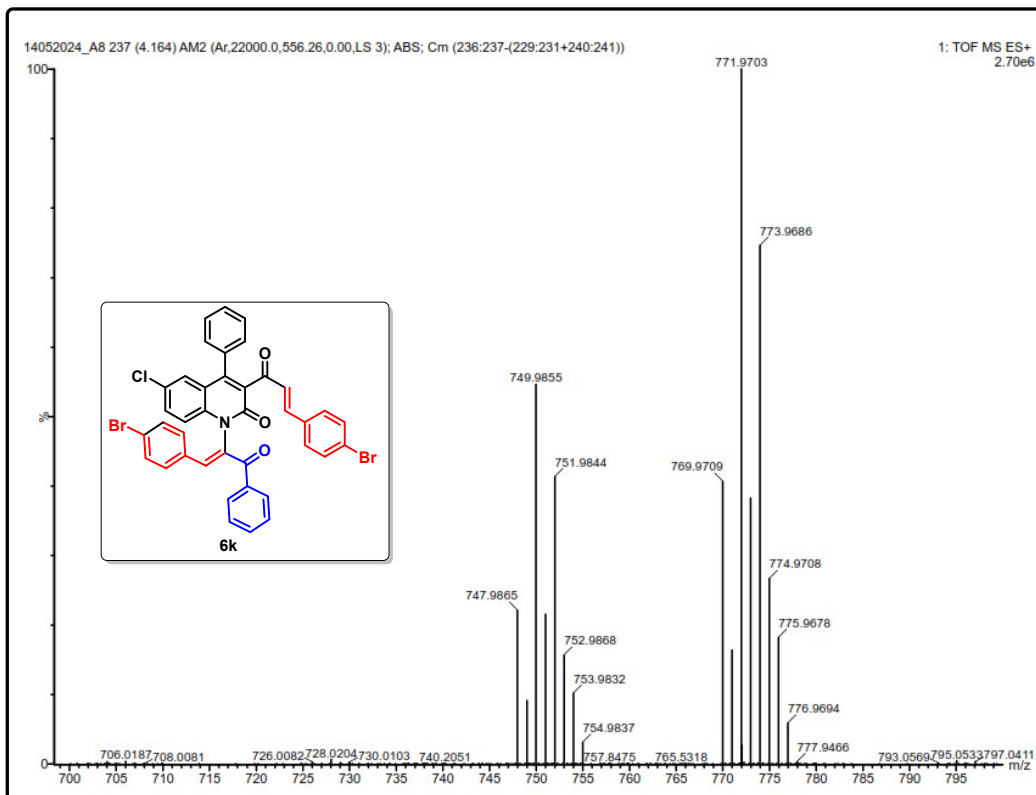

IR and HRMS spectra of compound **6k**

Signature SIF VIT VELLORE  
PB2CL2

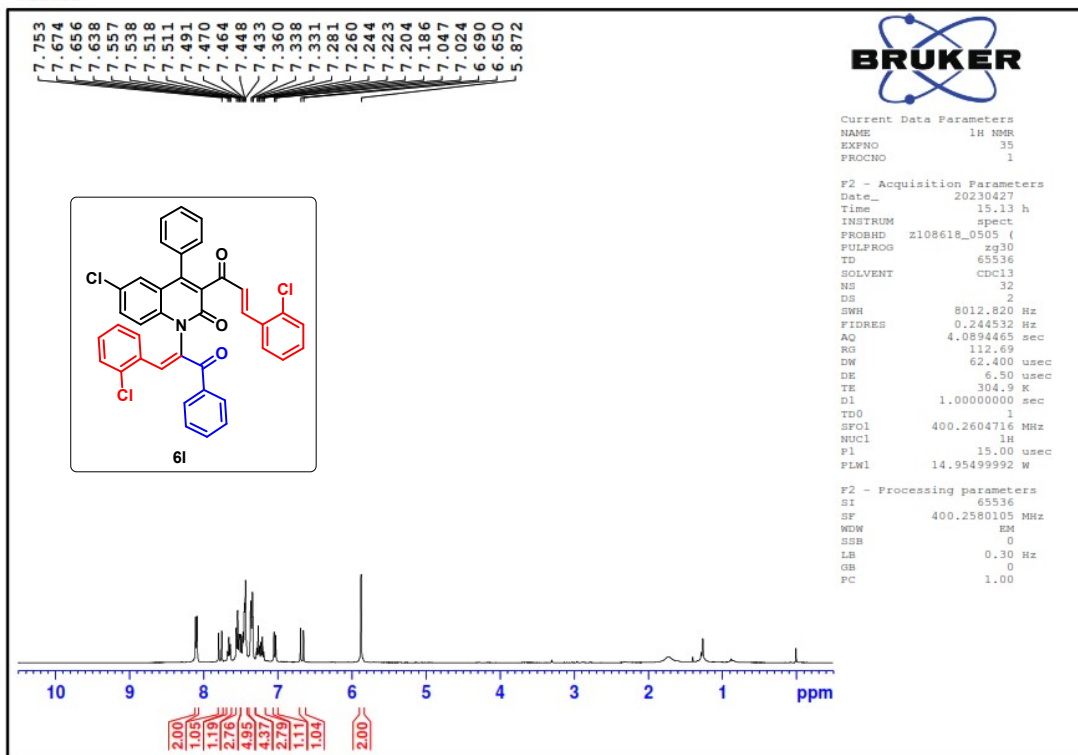

Signature SIF VIT VELLORE  
PB2CL1

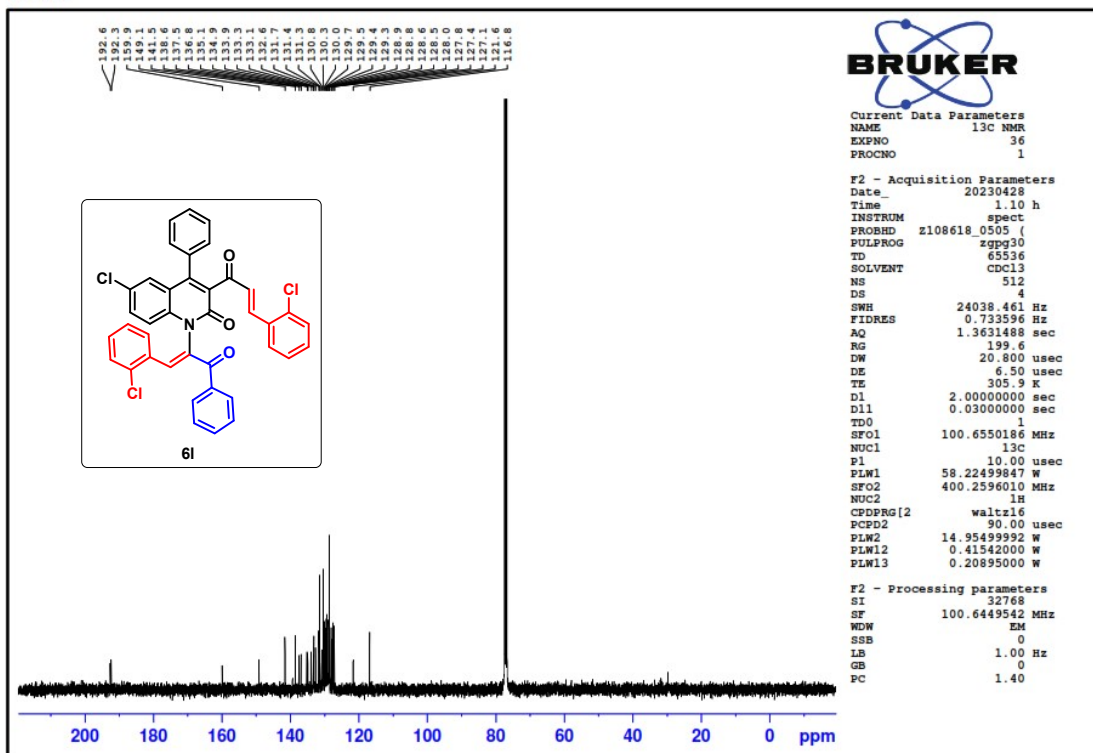

<sup>1</sup>H and <sup>13</sup>C NMR spectra of compound **6l** in CDCl<sub>3</sub>

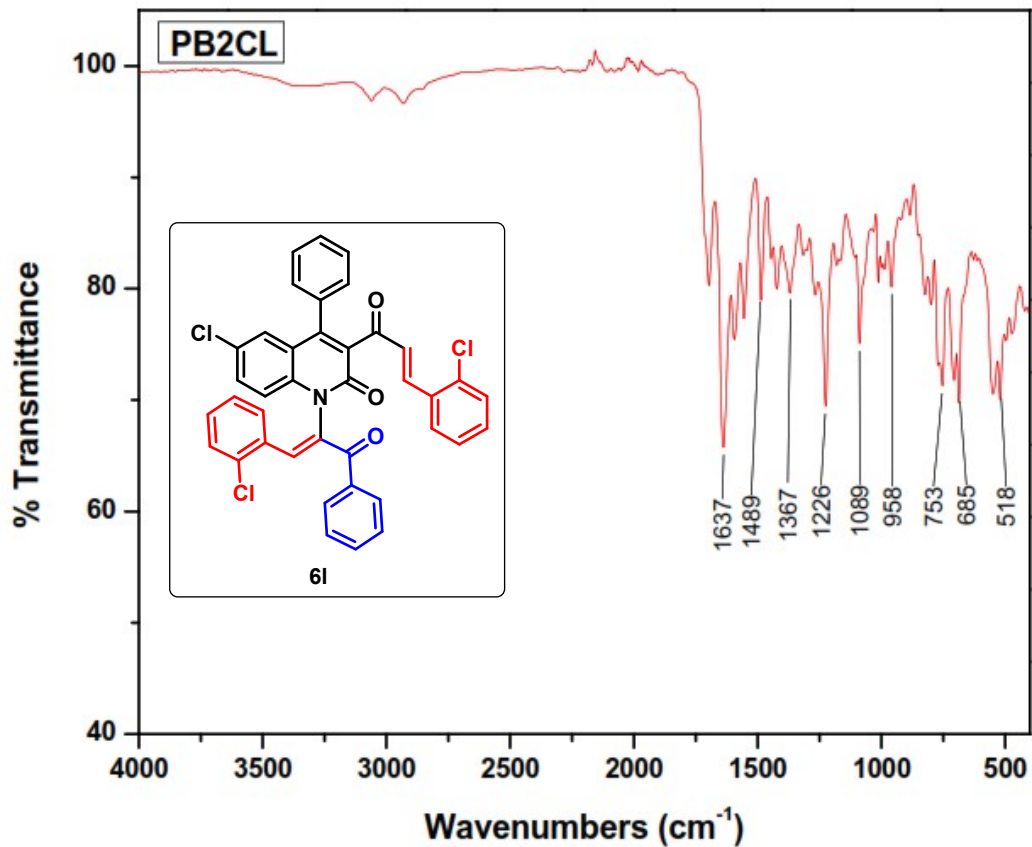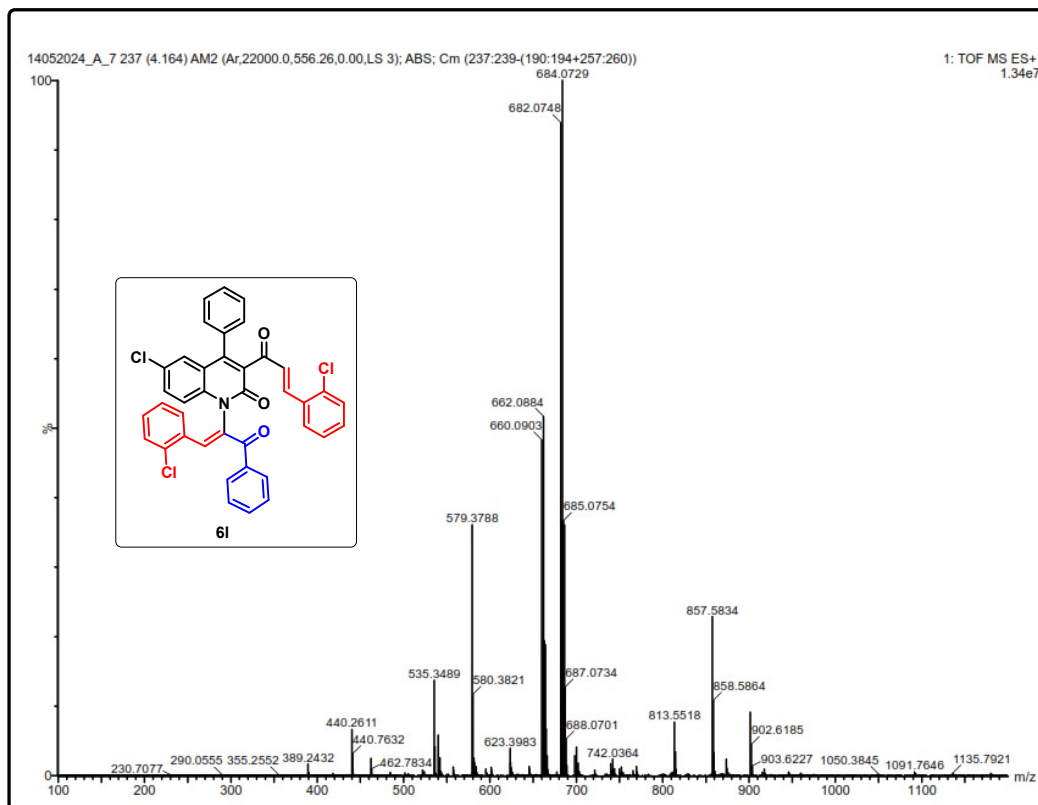

IR and HRMS spectra of compound **6l**

Signature SIF VIT VELLORE  
4CLPB2CL

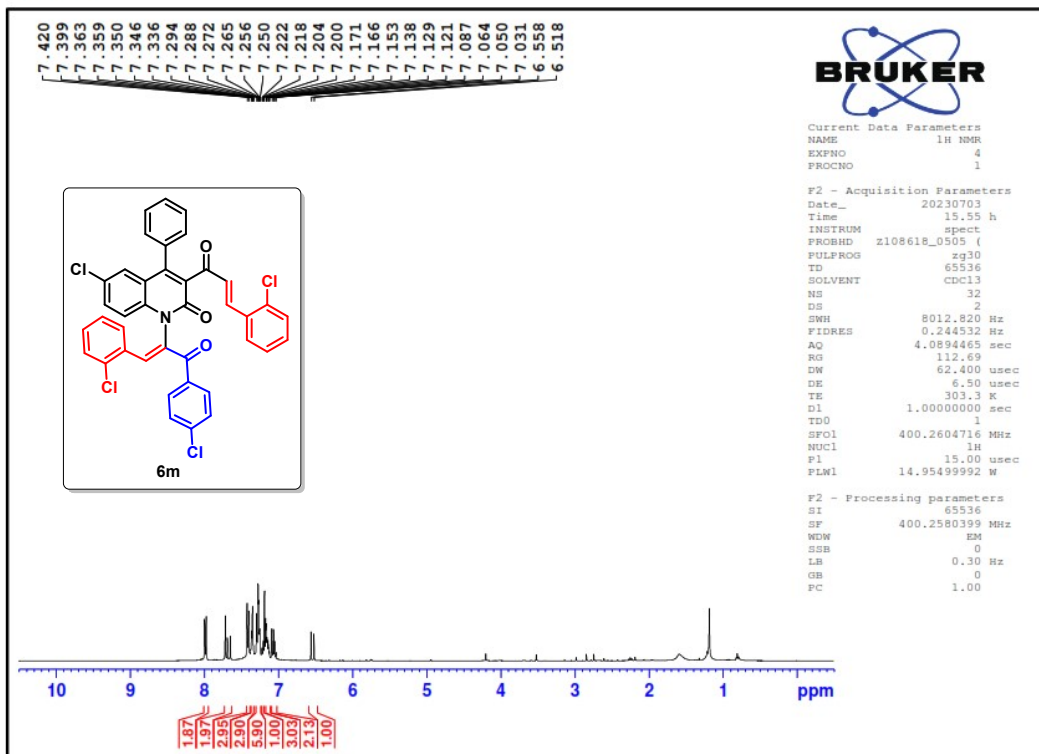

Signature SIF VIT VELLORE  
4CLPB2CL

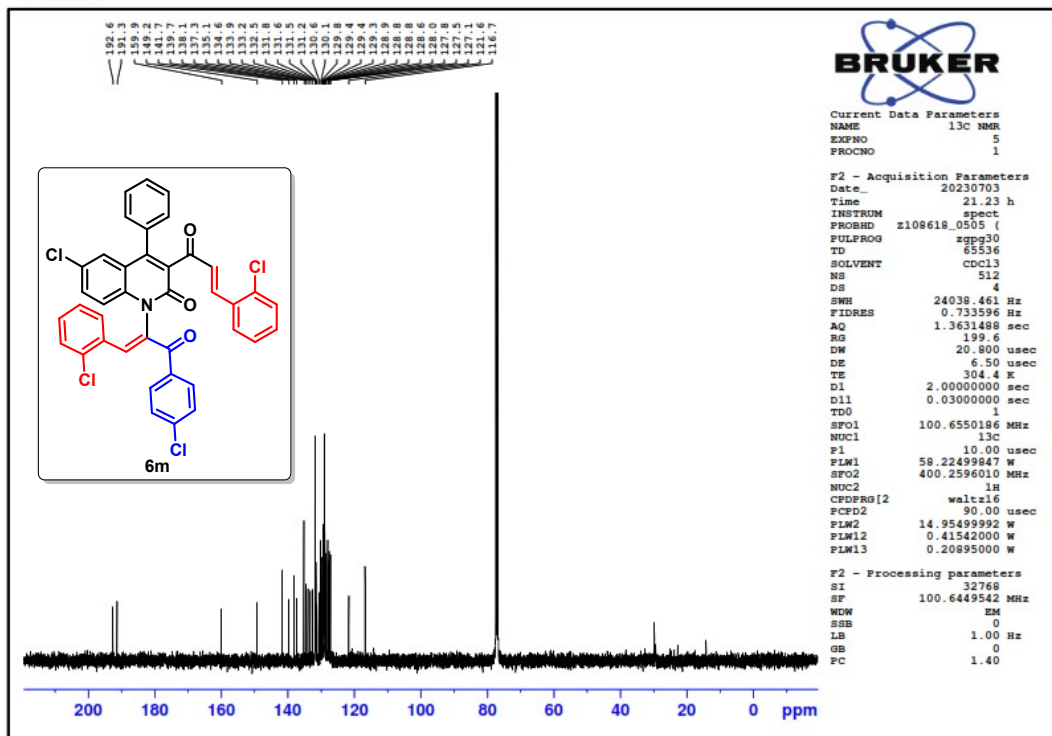

<sup>1</sup>H and <sup>13</sup>C NMR spectra of compound **6m** in CDCl<sub>3</sub>

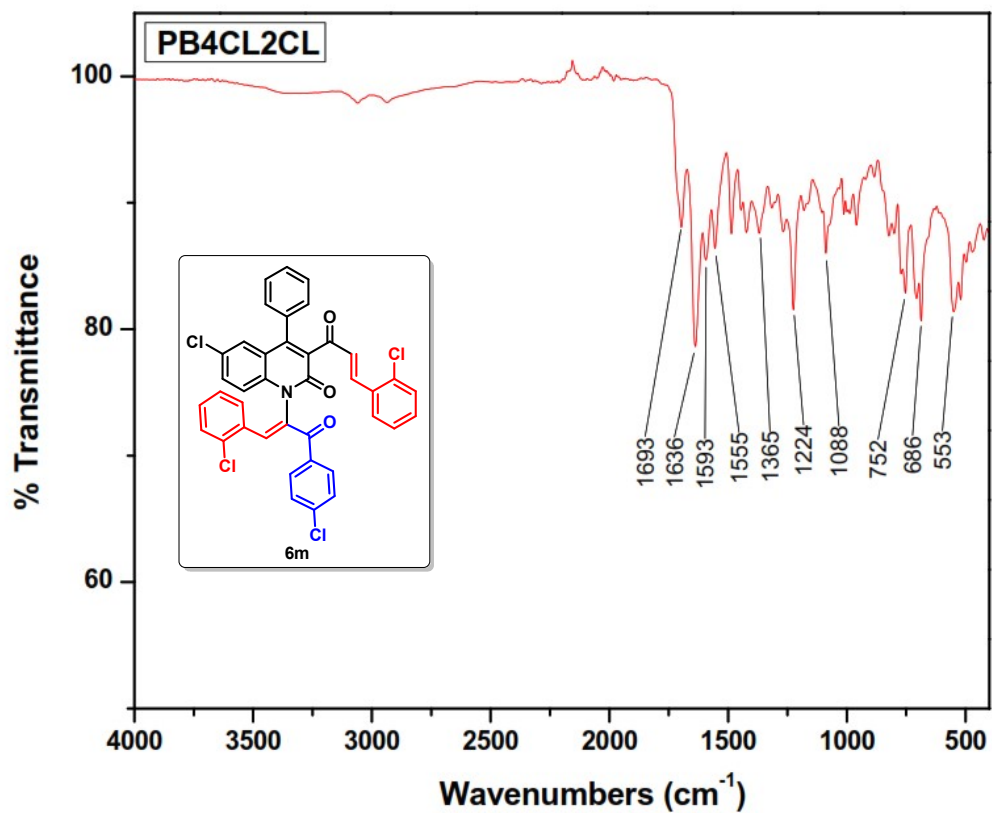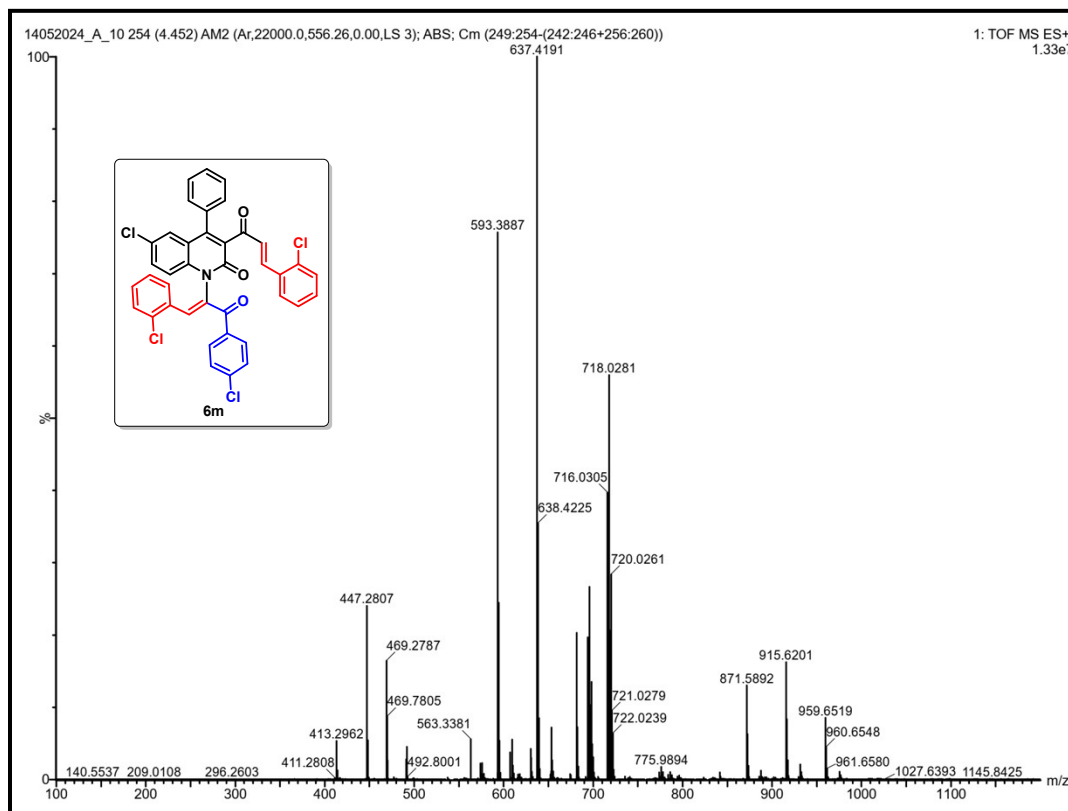

IR and HRMS spectra of compound **6m**



Signature SIF VIT VELLORE  
PB4FI

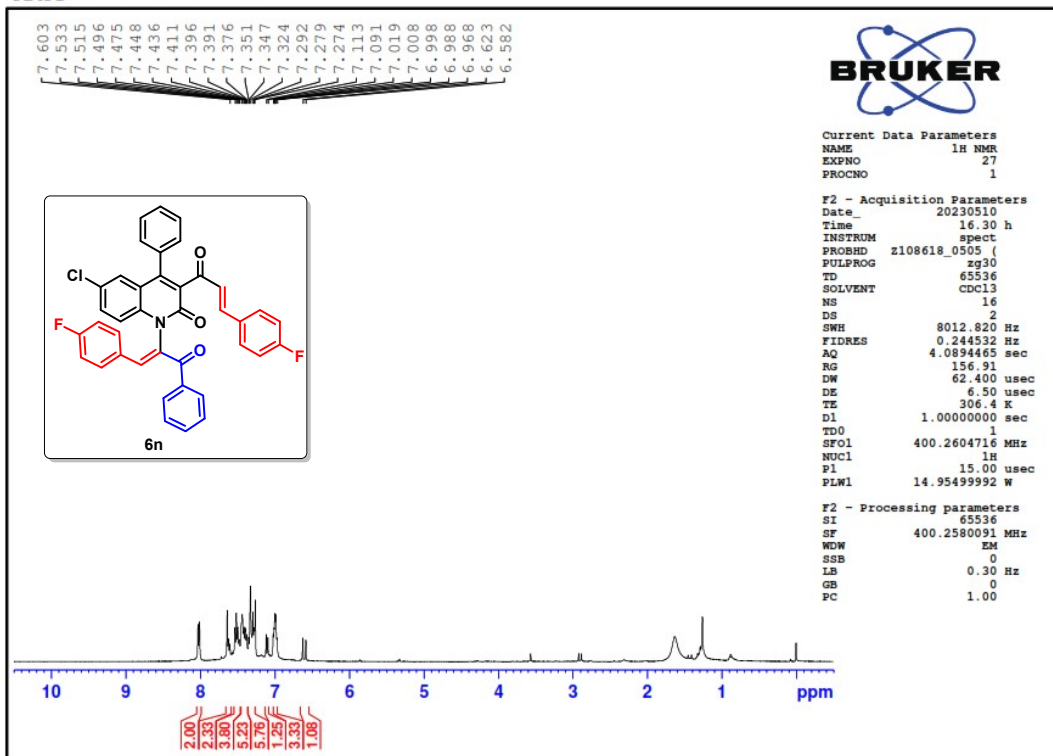

Signature SIF VIT VELLORE  
PB4F7

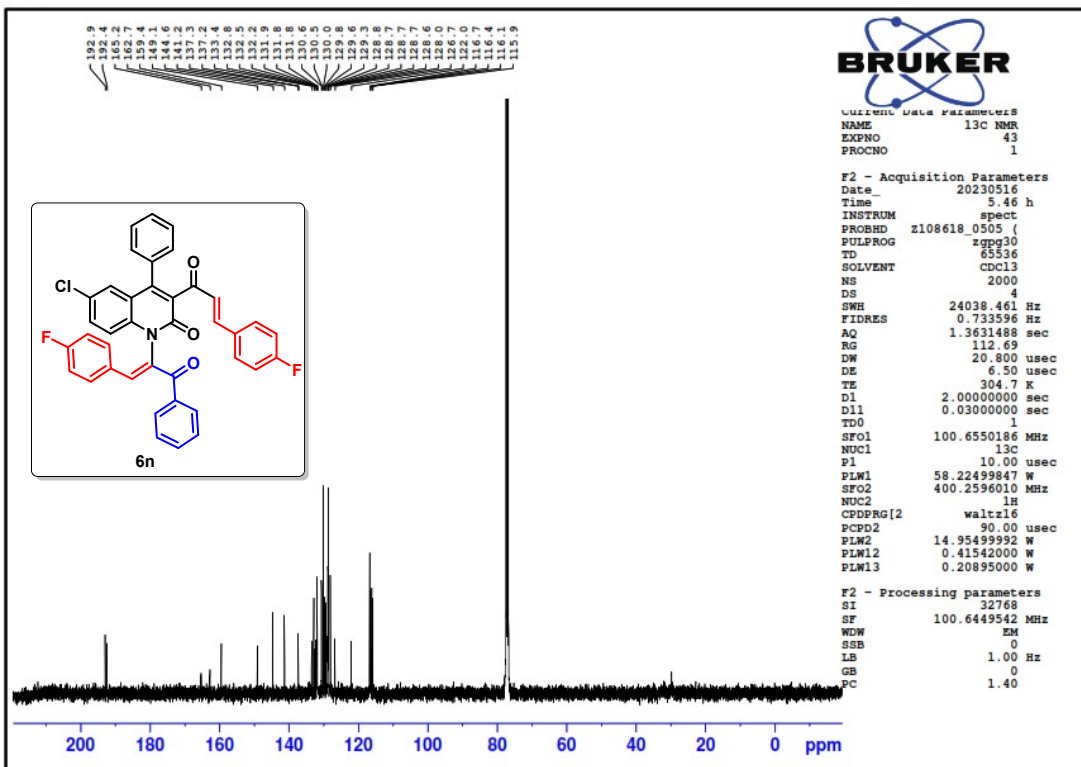

$^1\text{H}$  and  $^{13}\text{C}$  NMR spectra of compound **6n** in  $\text{CDCl}_3$

Signature SIF VIT VELLORE  
ACPB4F

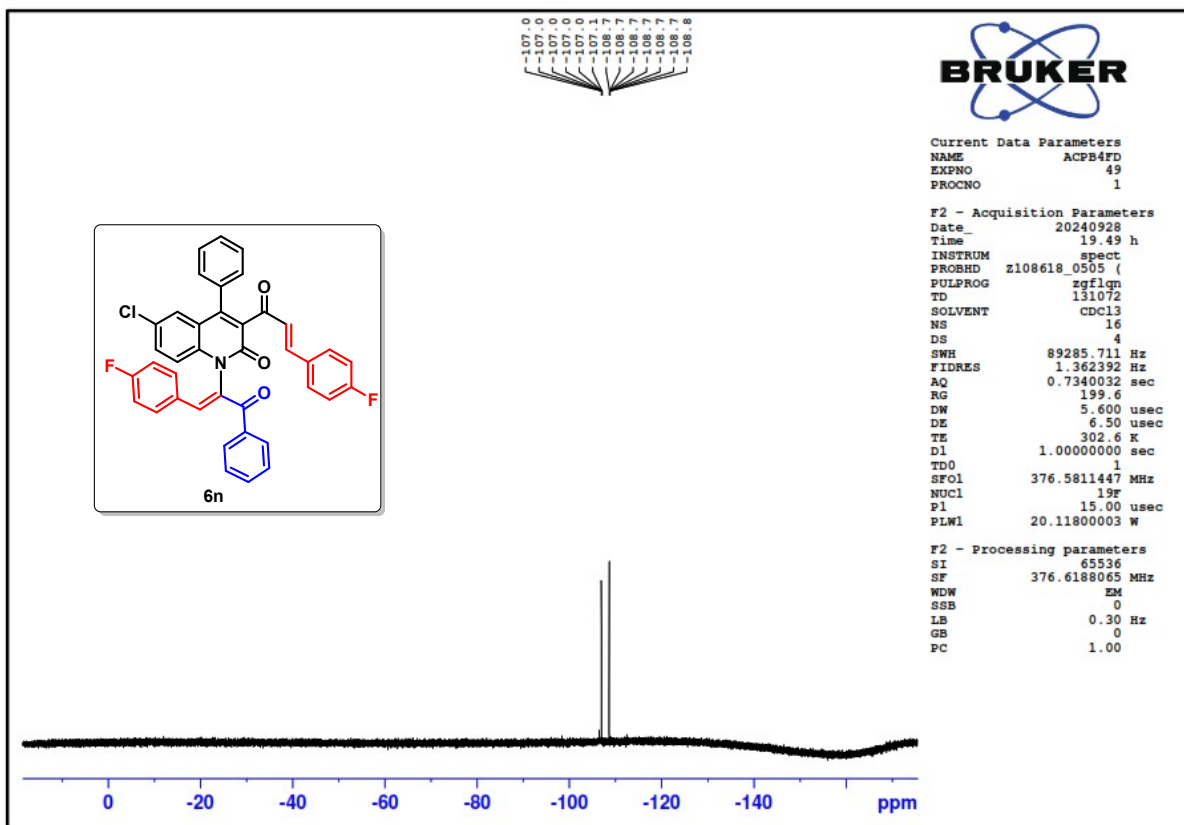

<sup>19</sup>F spectra of compound **6n**

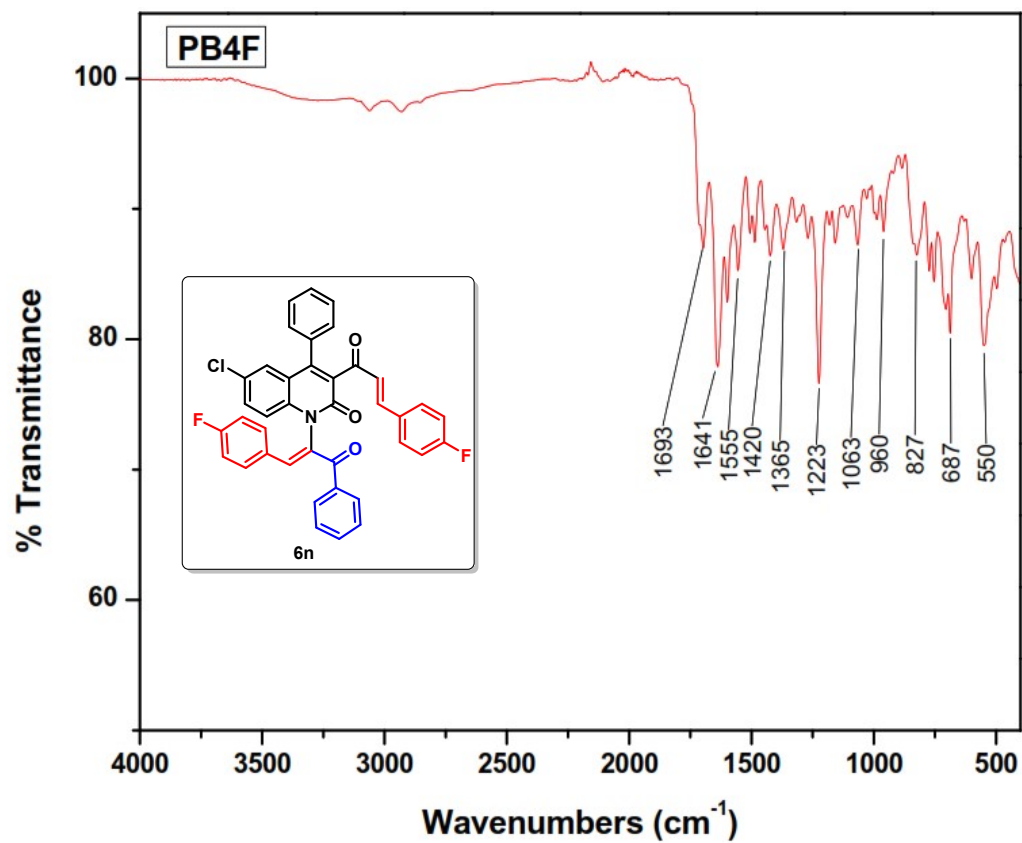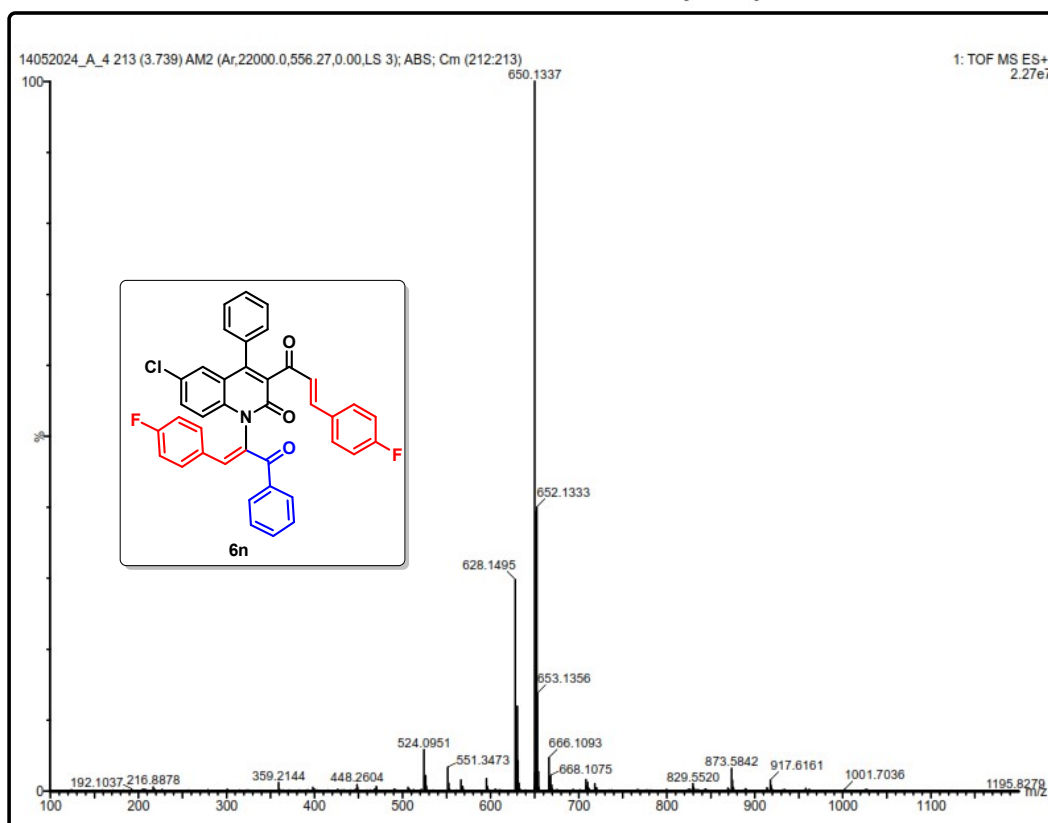

IR and HRMS spectra of compound **6n**

Signature SIF VIT VELLORE  
PBPTP

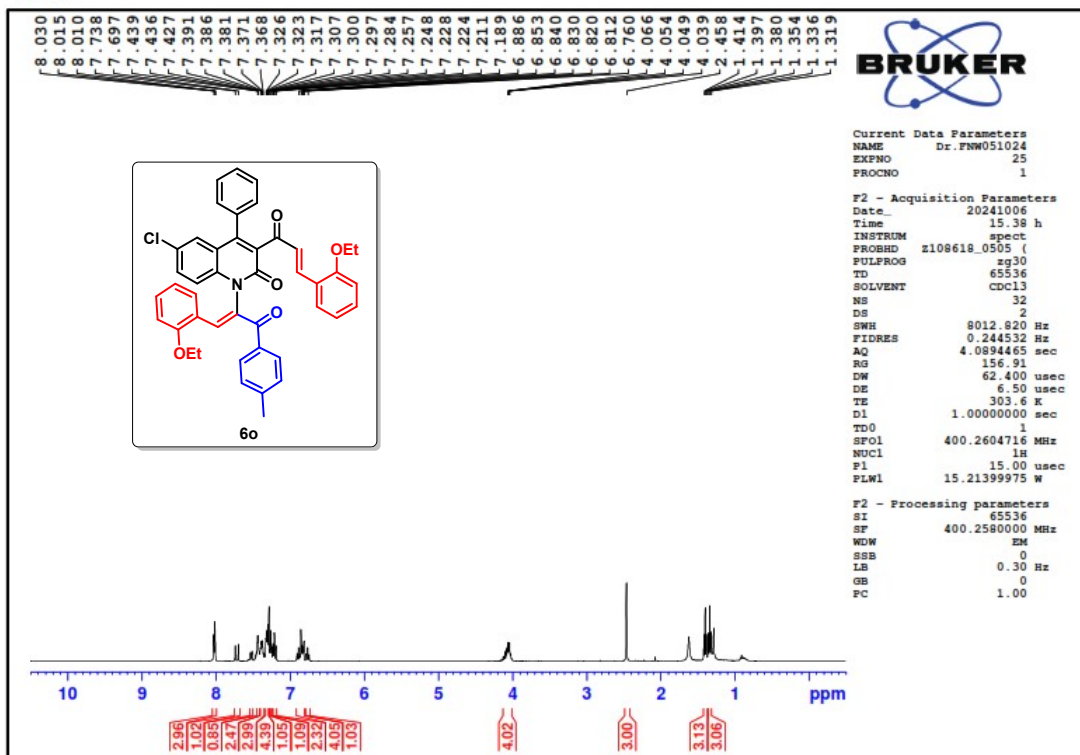

Signature SIF VIT VELLORE  
PBPTP

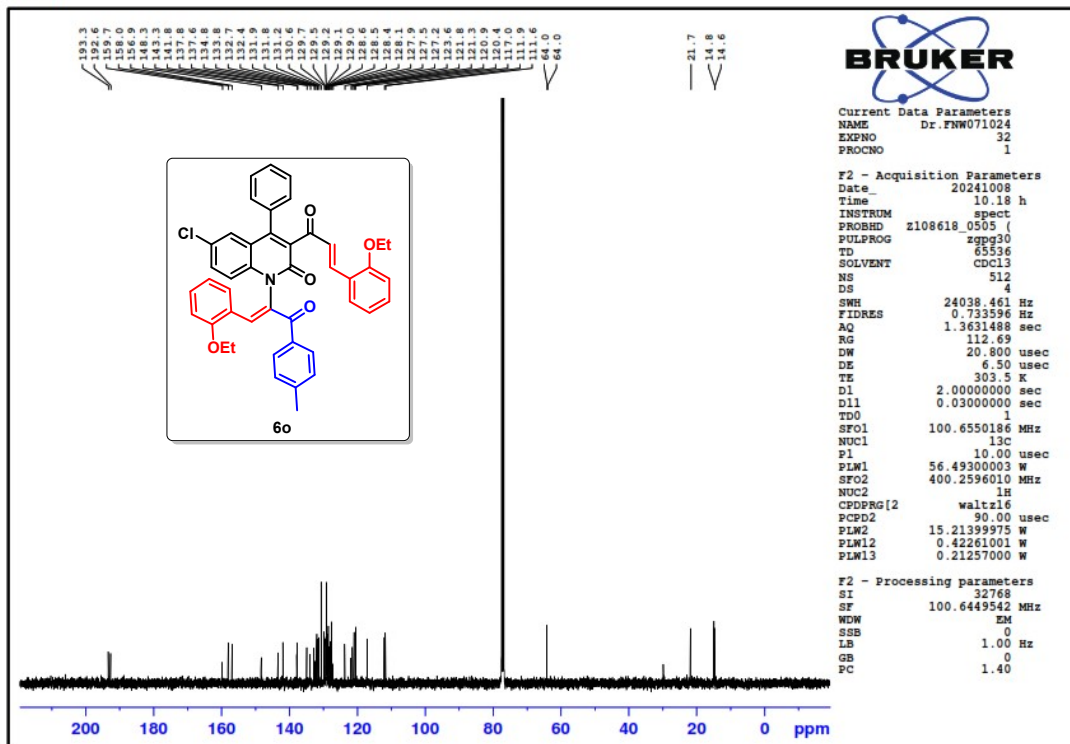

<sup>1</sup>H and <sup>13</sup>C NMR spectra of compound **6o** in CDCl<sub>3</sub>

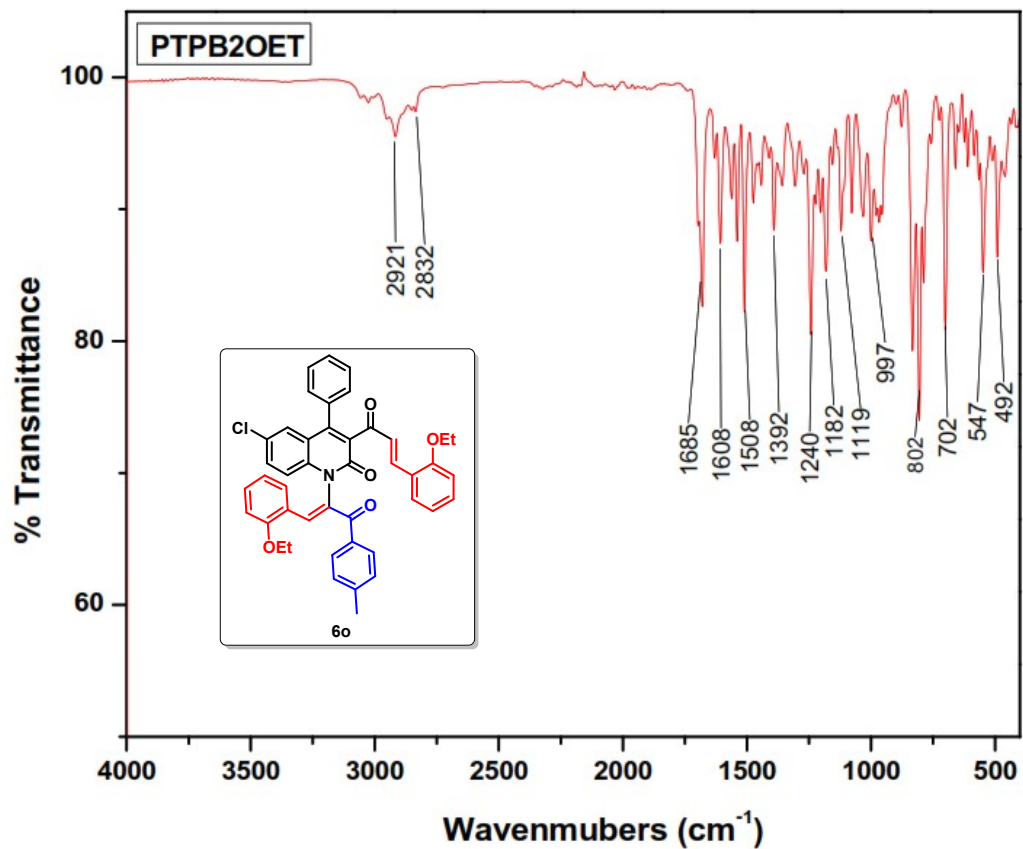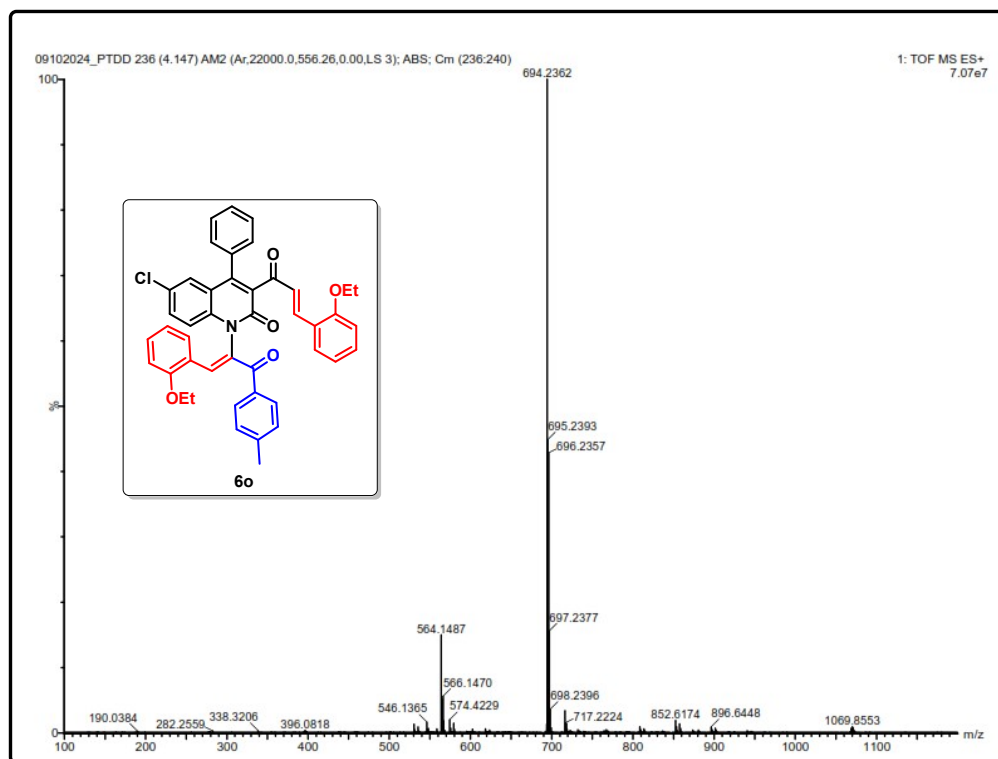

IR and HRMS spectra of compound **6o**

Signature SIF VIT VELLORE  
NO2P

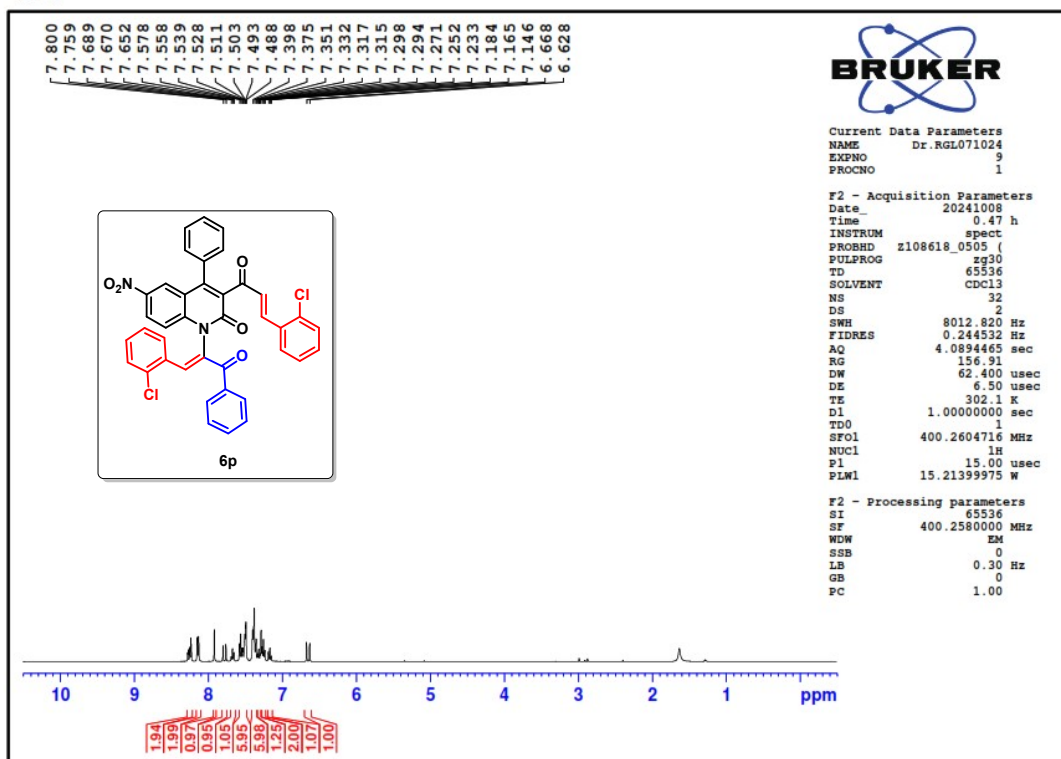

Signature SIF VIT VELLORE  
NO2P

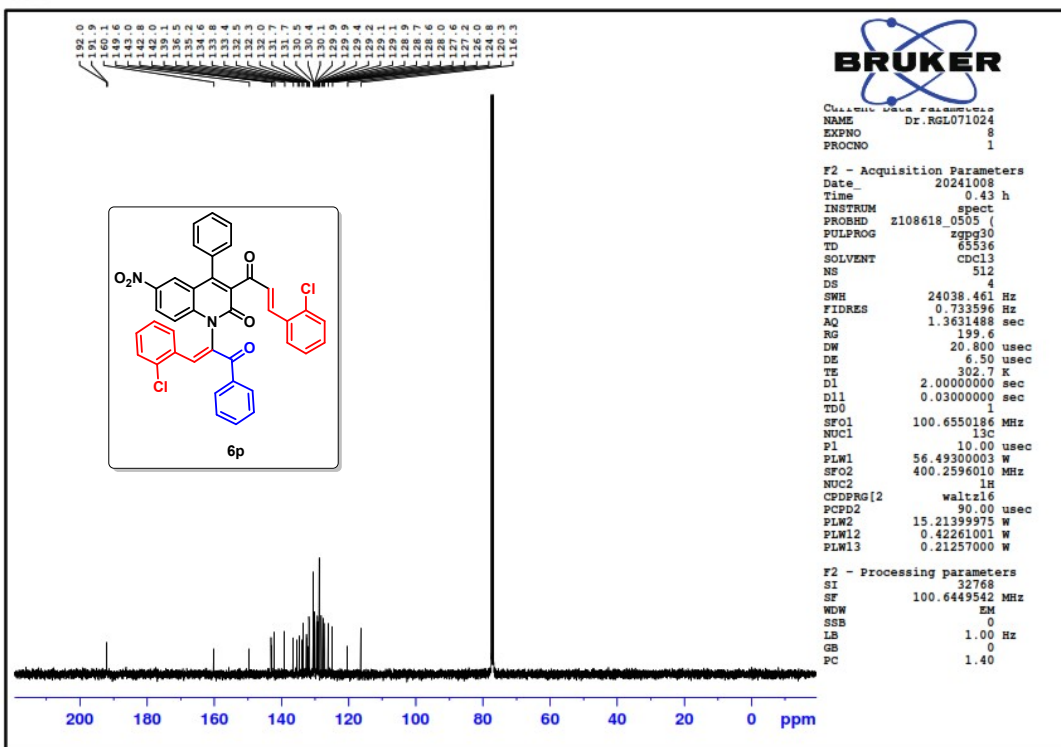

<sup>1</sup>H and <sup>13</sup>C NMR spectra of compound **6p** in CDCl<sub>3</sub>

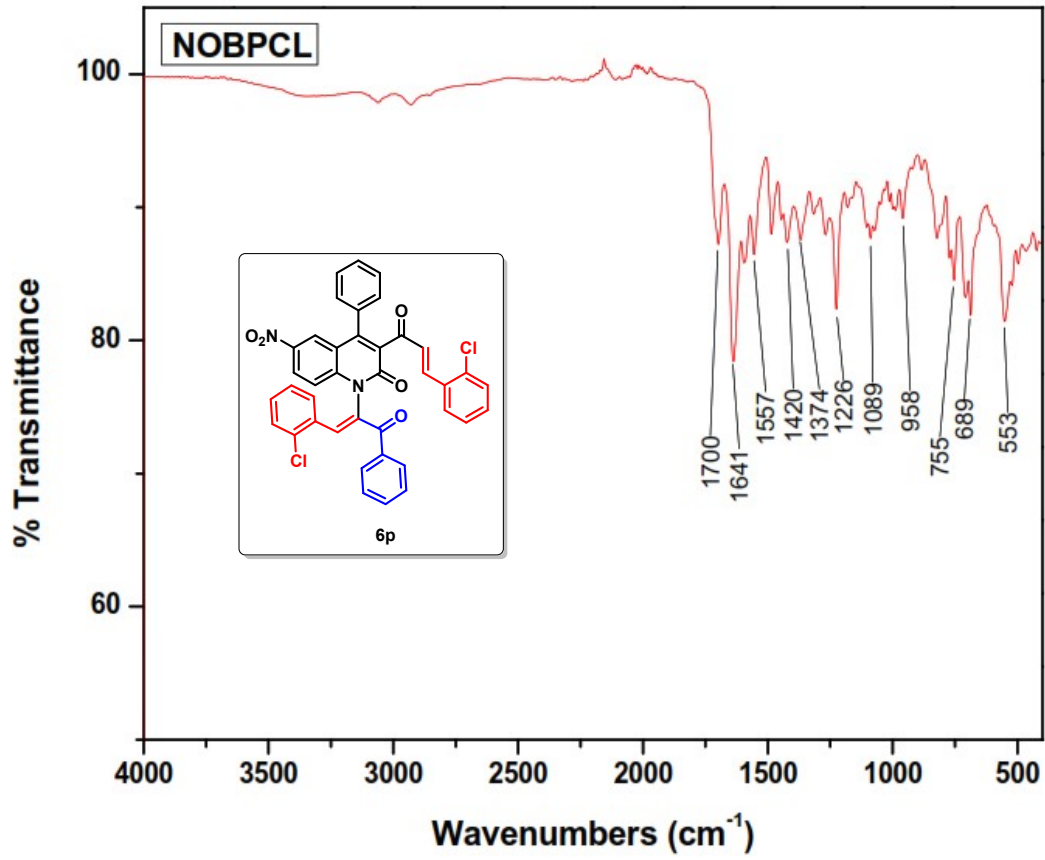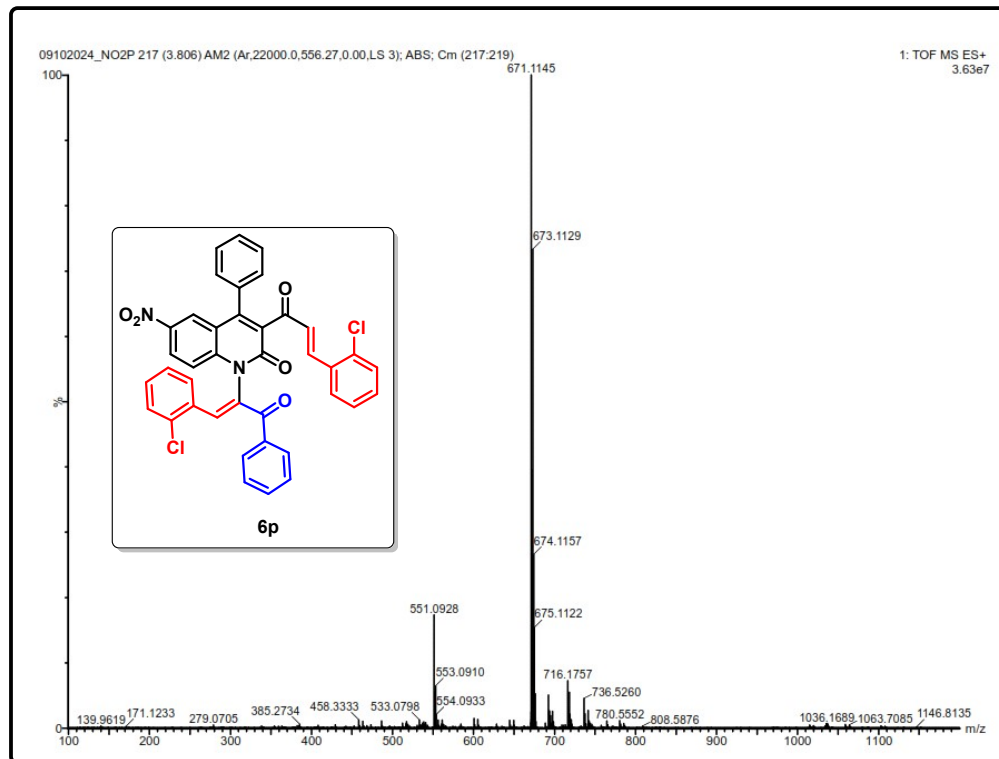

IR and HRMS spectra of compound **6p**

Signature SIF VIT VELLORE  
BOH

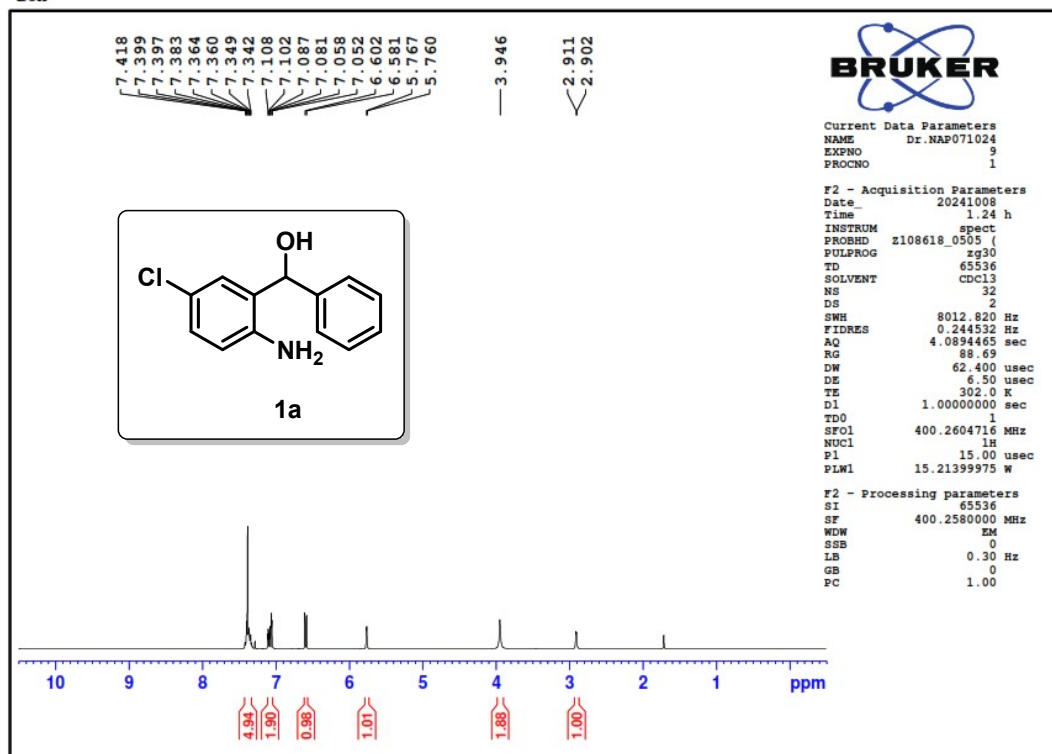

Signature SIF VIT VELLORE  
BOH

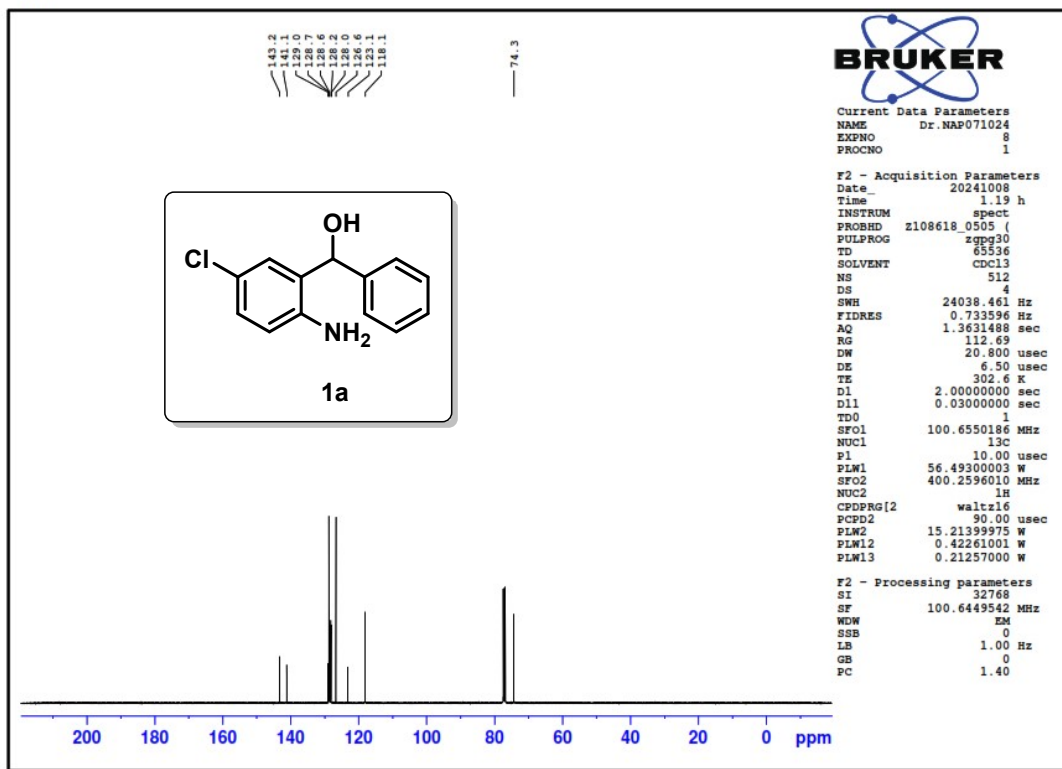

<sup>1</sup>H and <sup>13</sup>C NMR spectra of compound **1a** in CDCl<sub>3</sub>



## 7. References:

1. V. Krishnakumar, N. G. Vindhya, B. K. Mandal and F.-R. Nawaz Khan, *Ind. Eng. Chem. Res.*, 2014, **53**, 10814–10819.
2. J.-C. Yang, M.-L. Liao, P.-G. Li and L.-H. Zou, *Green Chem.*, 2024, **26**, 9295–9299.
